# Supplementary material for: Iminophosphorane-mediated regioselective umpolung alkylation reaction of α-iminoesters
Source: Royal Society of Chemistry journal article supplement (doi:10.1039/d1ob00596k), 2021-01-01
Supplement: d1ob00596k1.pdf [file d1ob00596k1.pdf]

*Supporting Information*

**Iminophosphorane-mediated regioselective umpolung alkylation reaction of  $\alpha$ -iminoesters**

Yasushi Yoshida,\* Mayu Kukita, Kazuki Omori, Takashi Mino, and Masami Sakamoto

Molecular Chirality Research Center, Graduate School of Science and Engineering, Chiba University

1-33, Yayoi-cho, Inage-ku, Chiba-shi, Chiba 263-8522 (Japan)

Fax +8143-290-3386

E-mail yoshiday@chiba-u.jp

**Table of Contents**

|                                                 |                |
|-------------------------------------------------|----------------|
| <b>1. NMR and HPLC charts for new compounds</b> | <b>S2–S85</b>  |
| <b>2. Calculation results</b>                   | <b>S85–S92</b> |

# 1. NMR and HPLC charts for new compounds

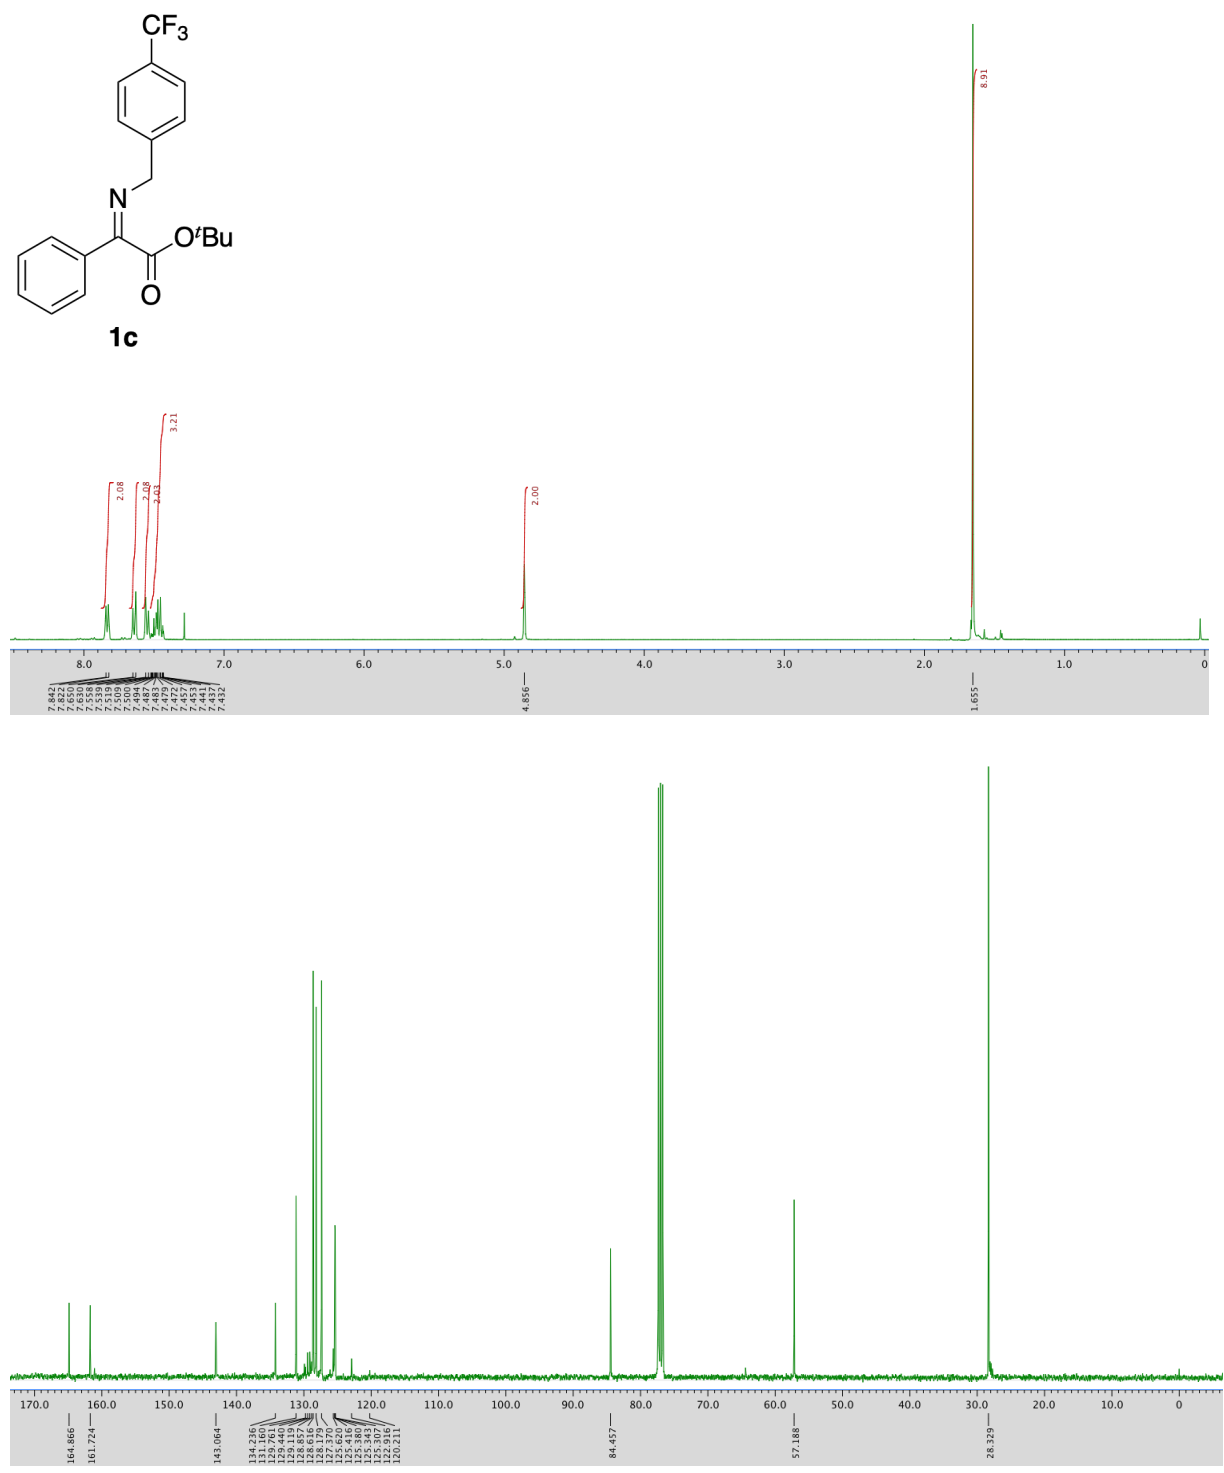

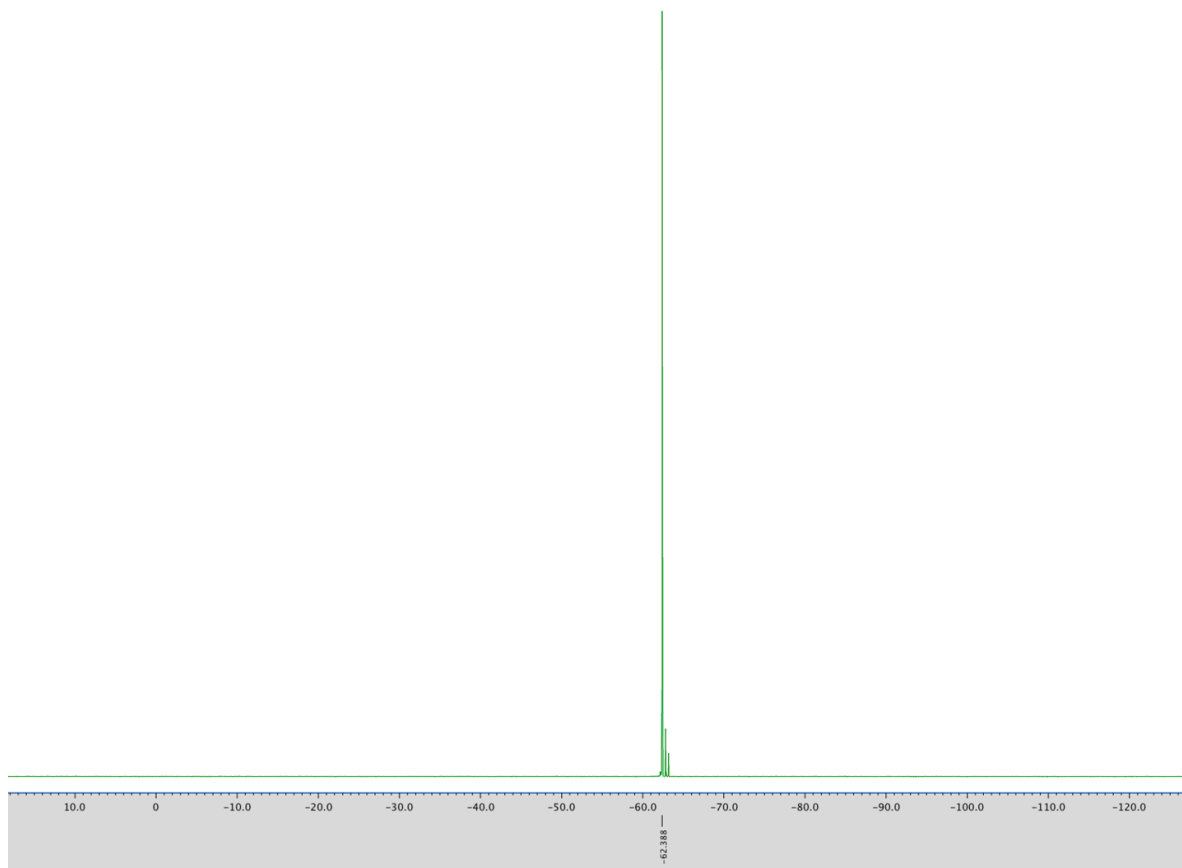

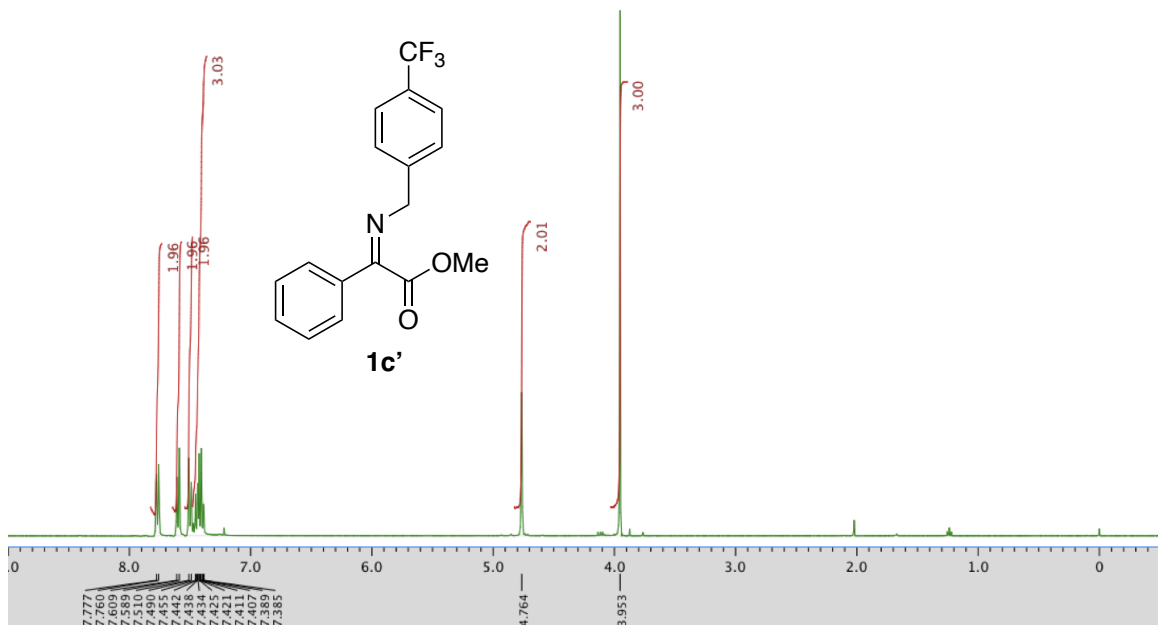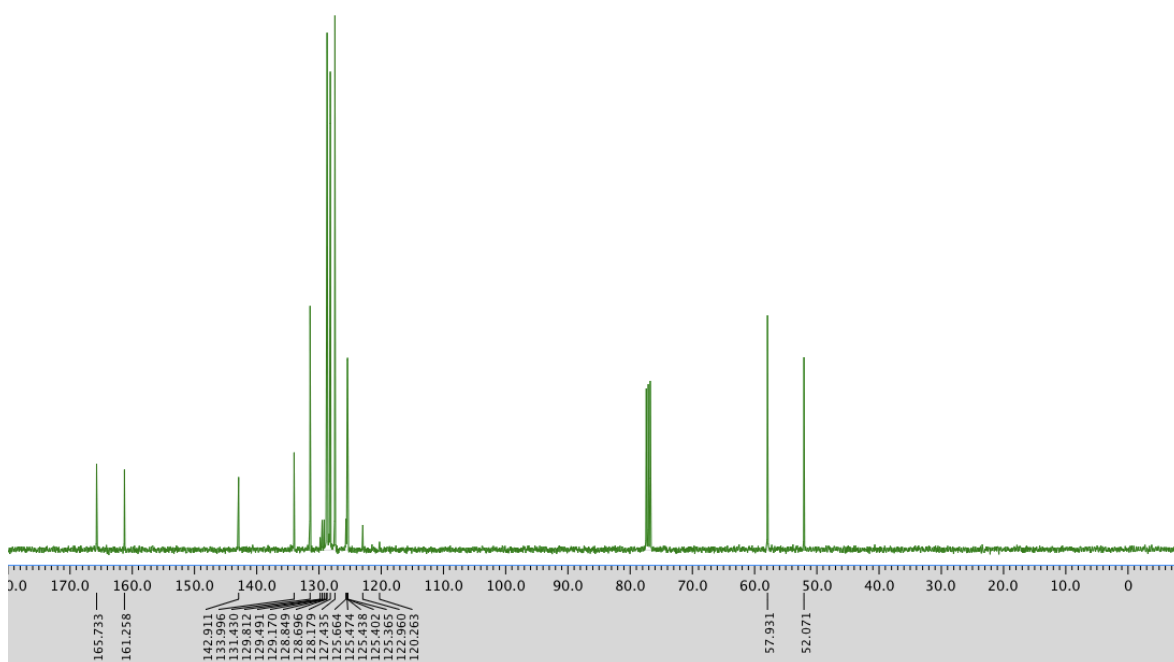

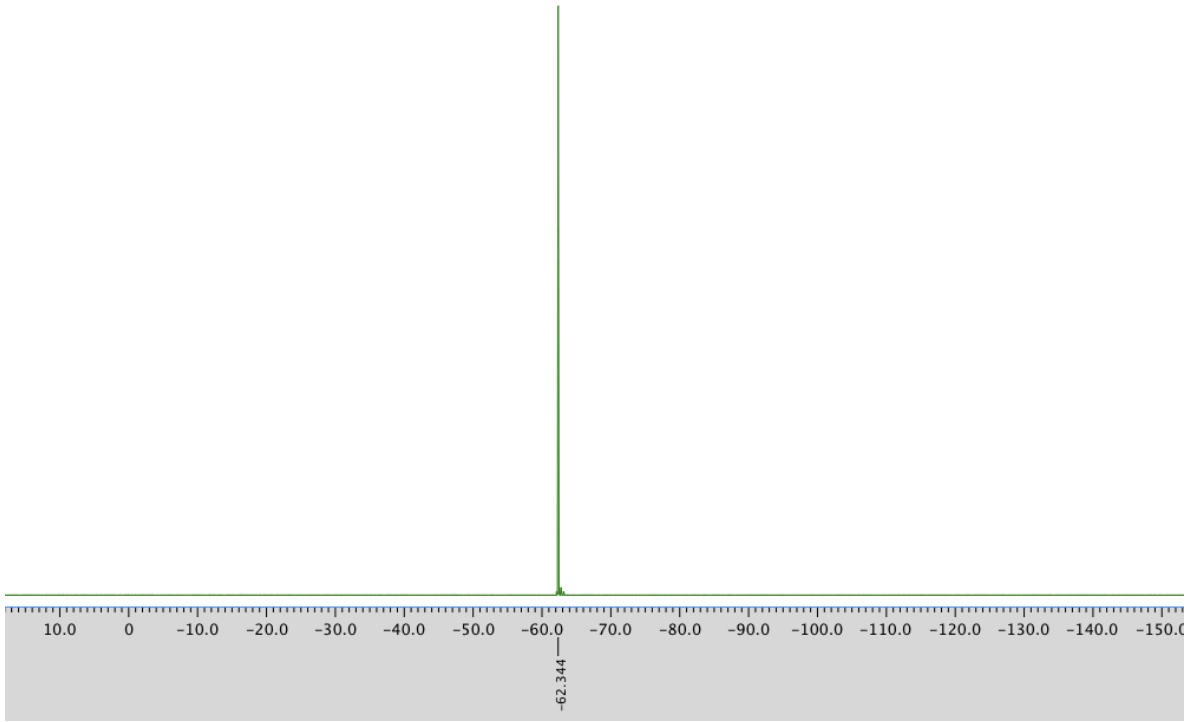

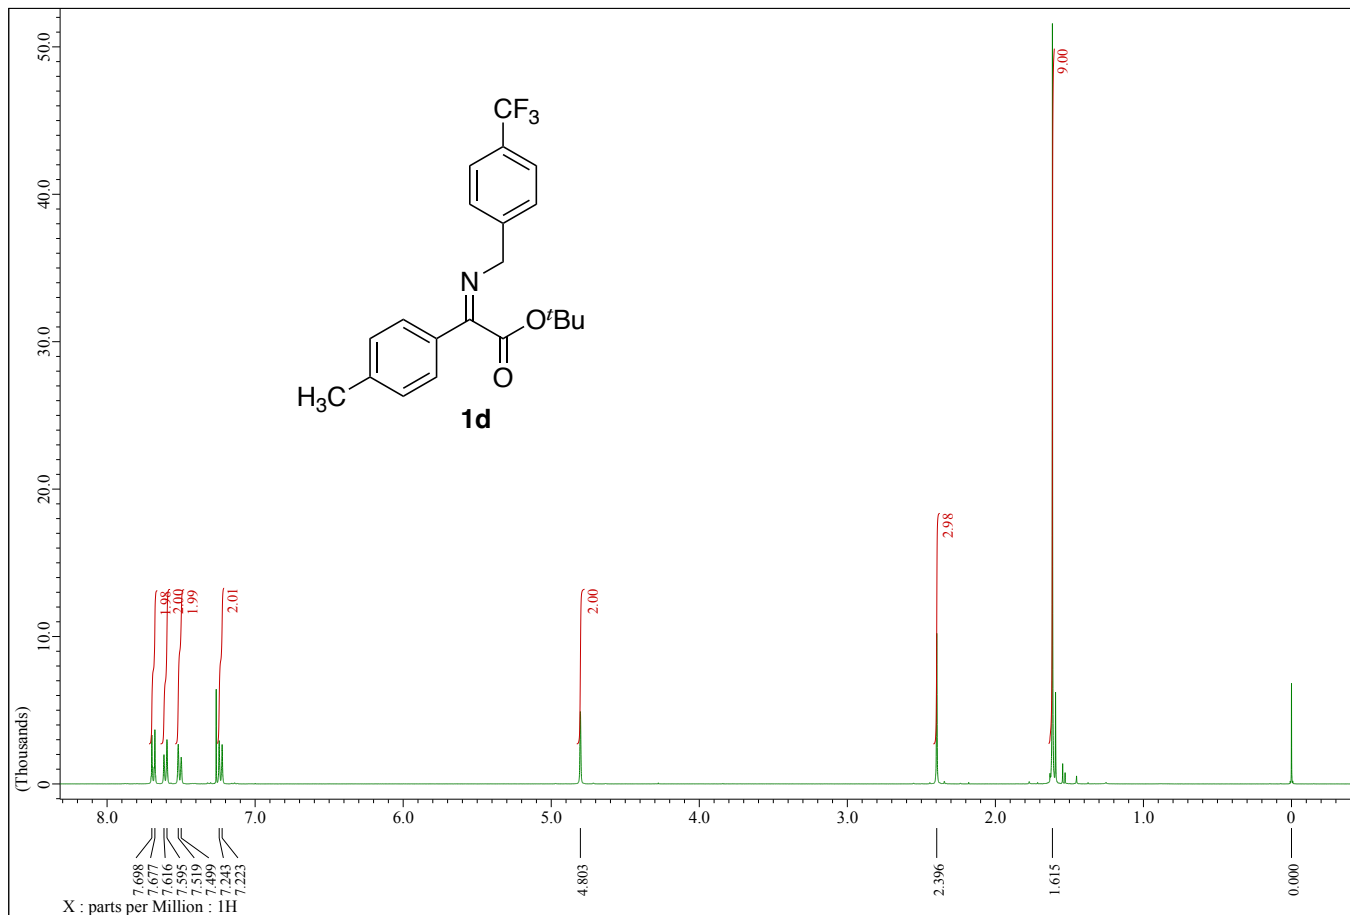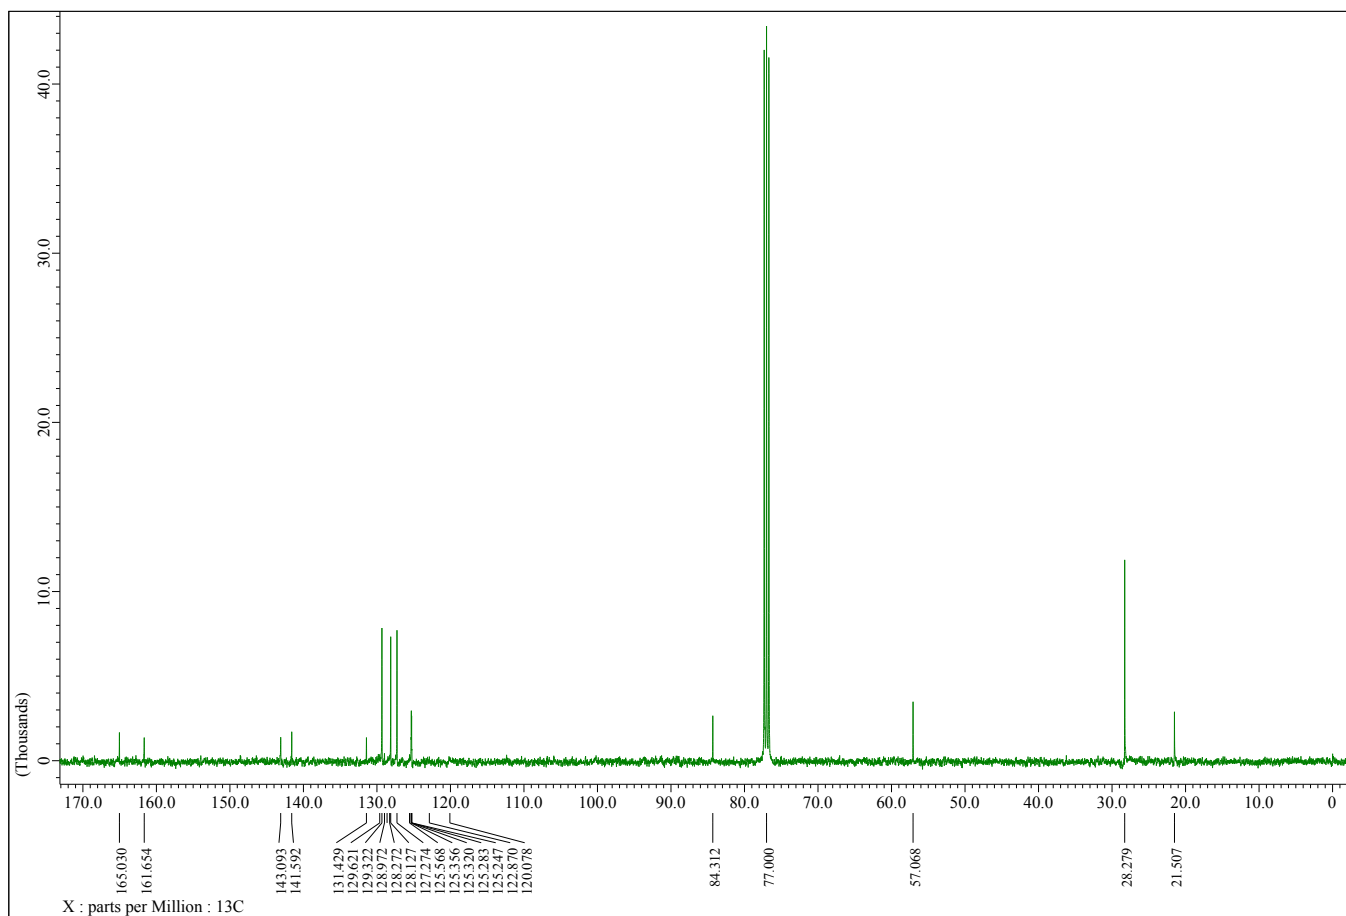

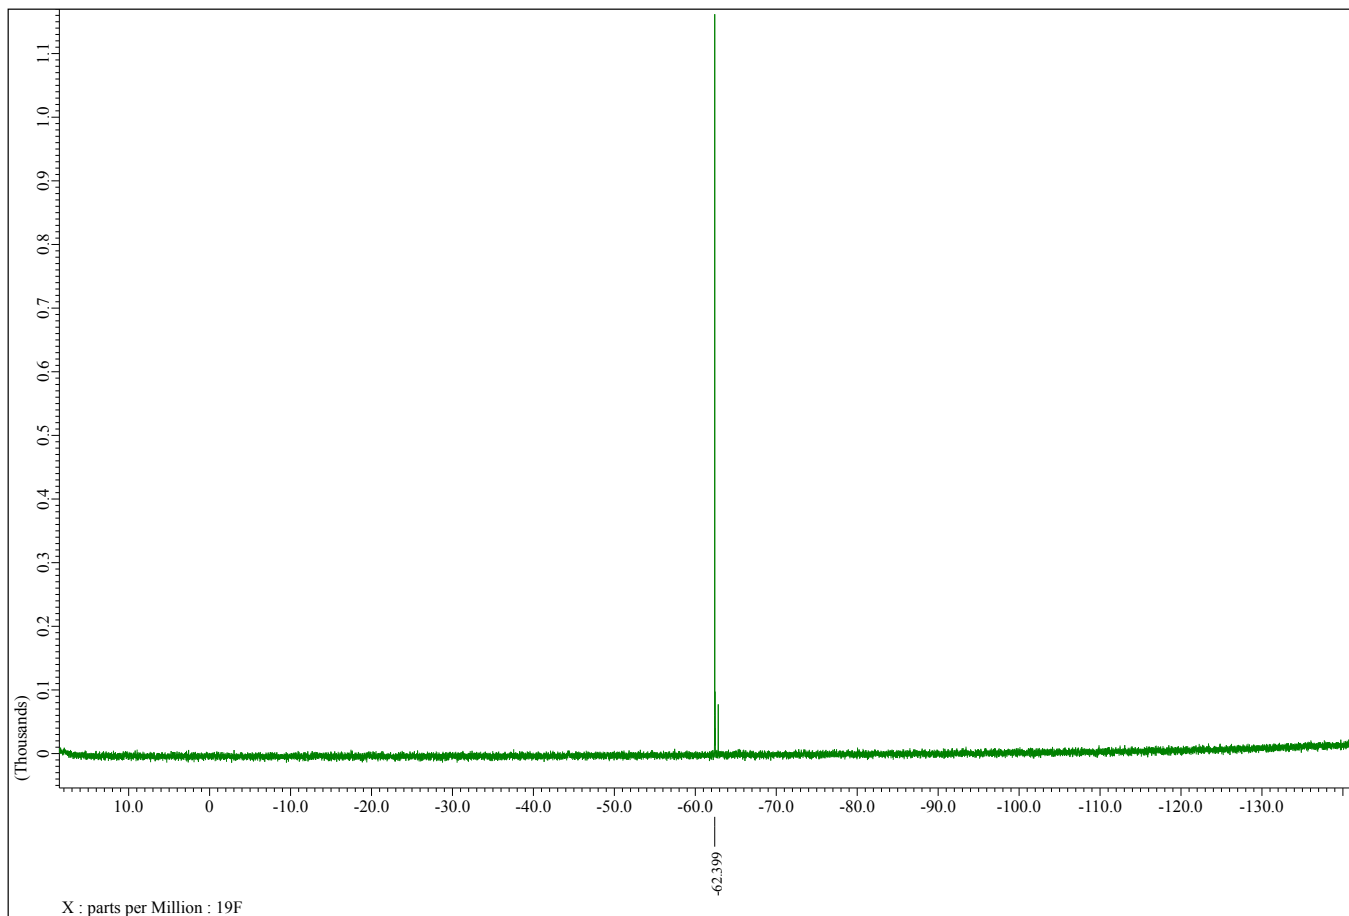

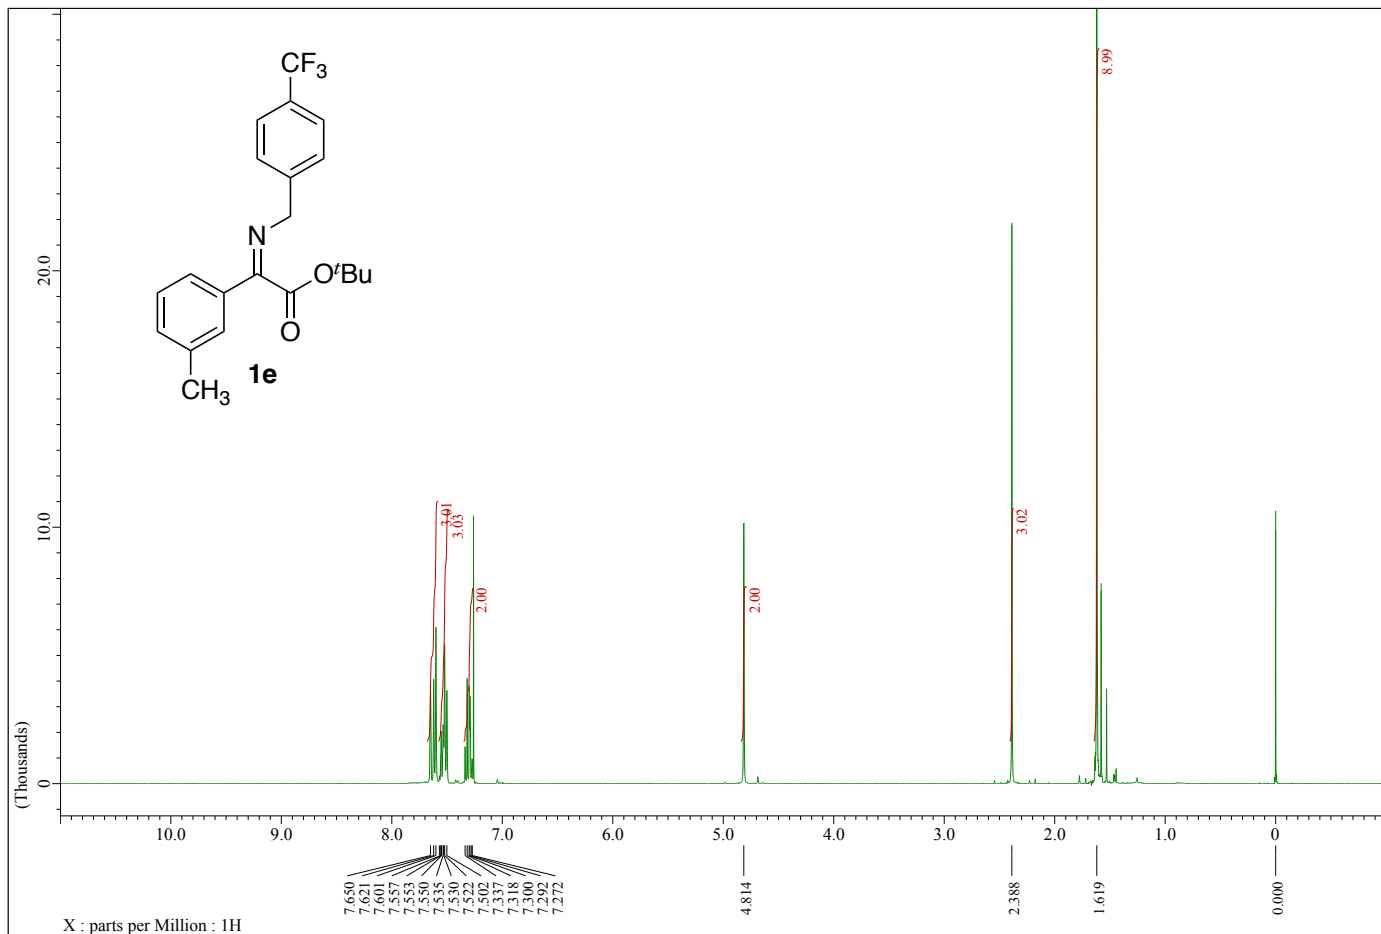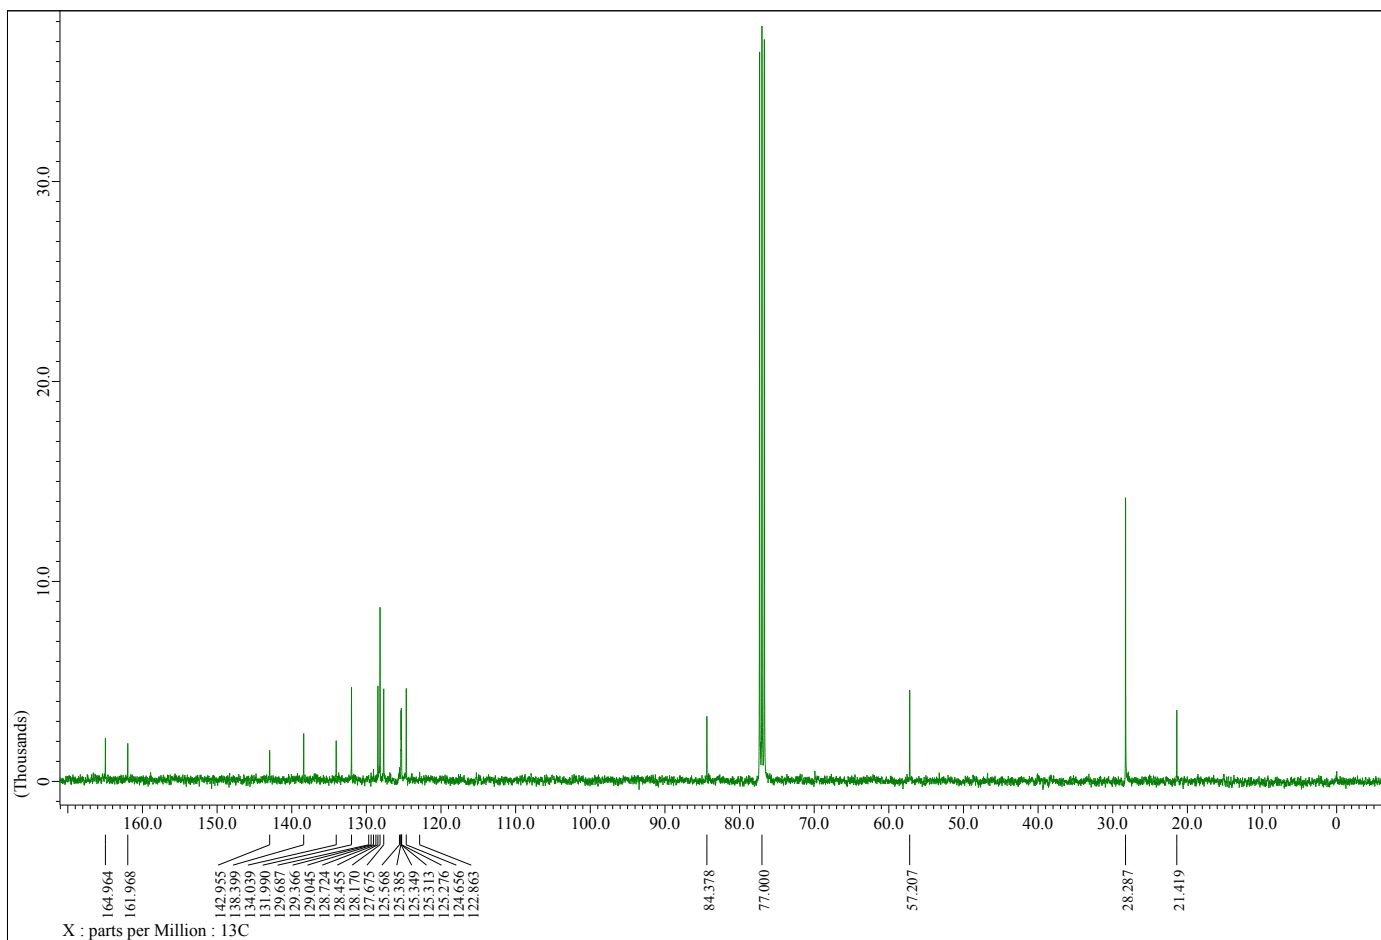



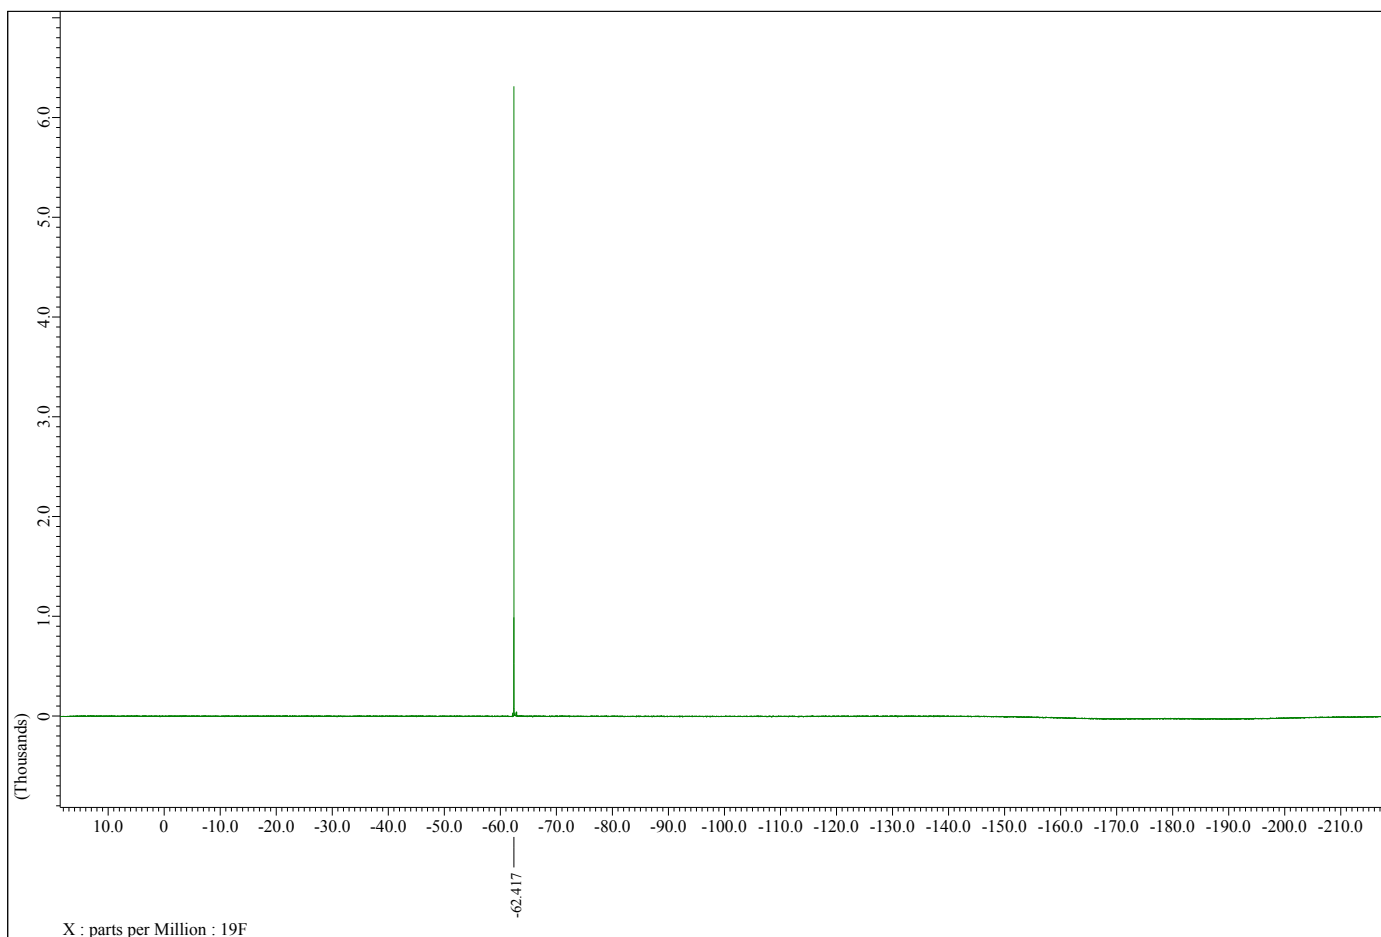

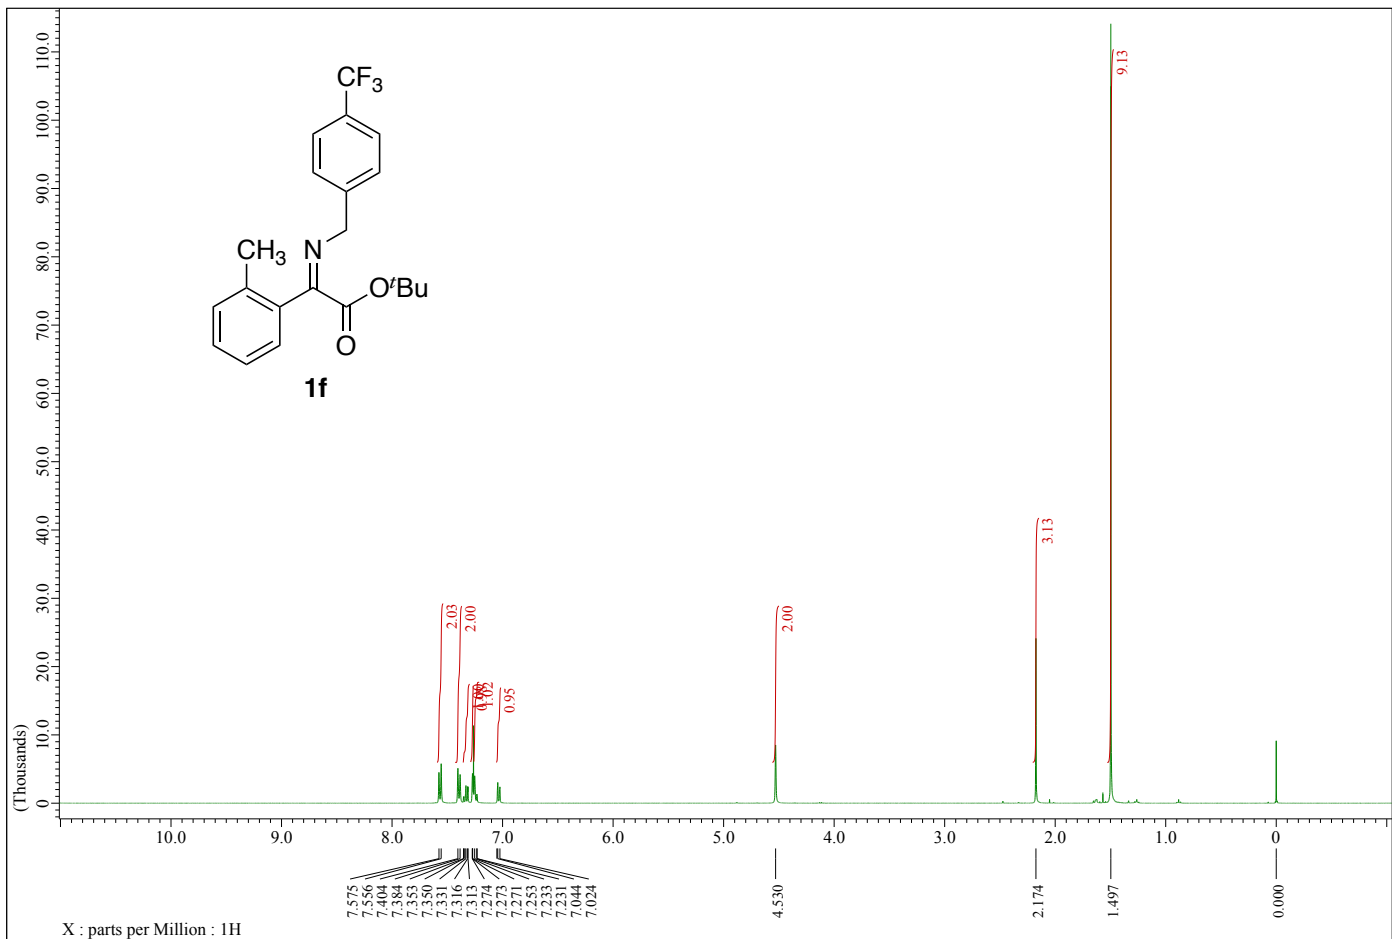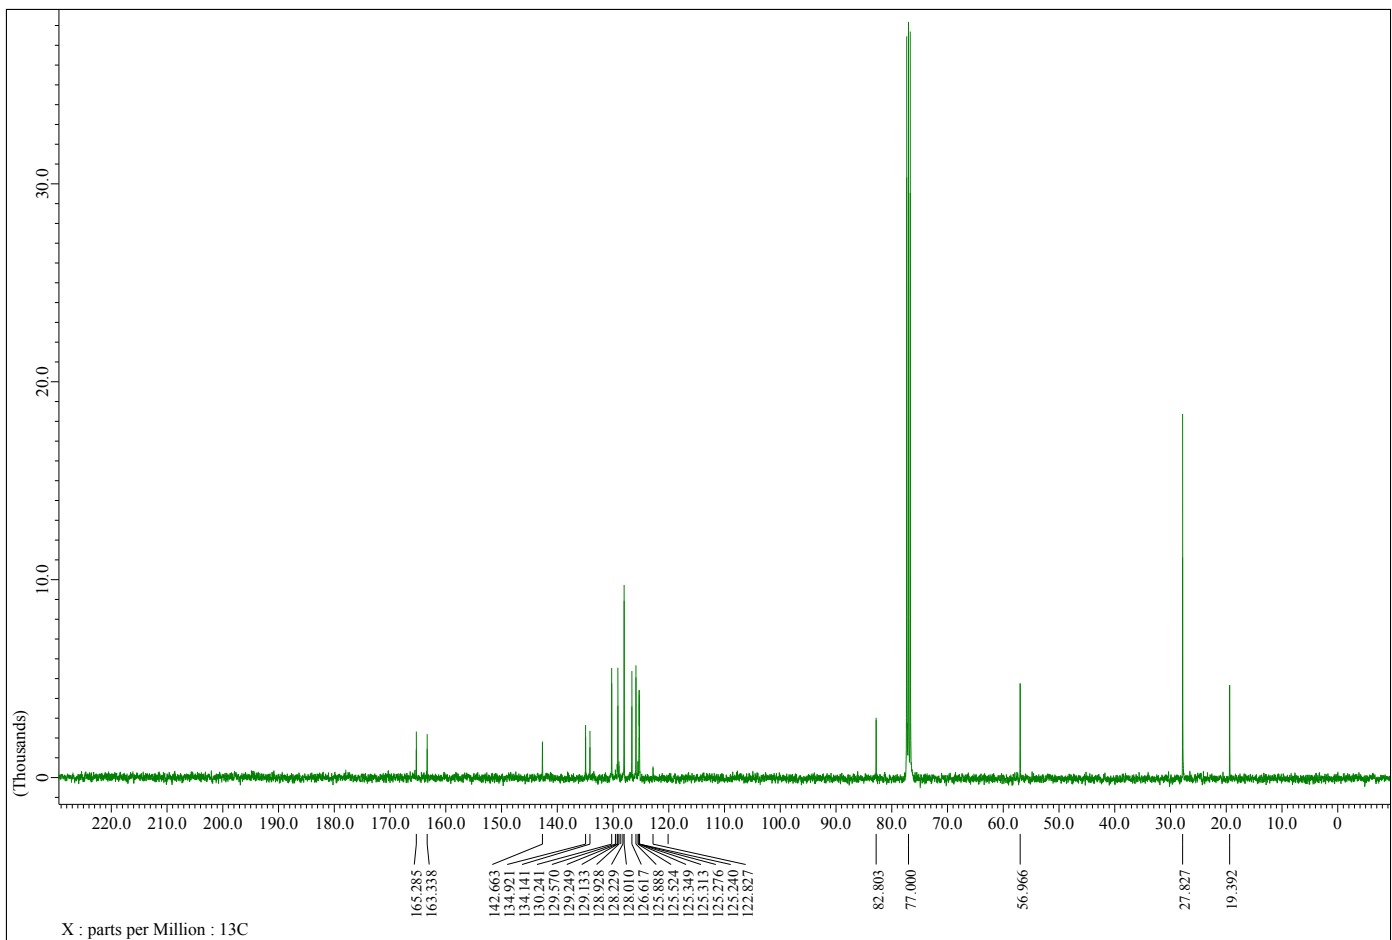

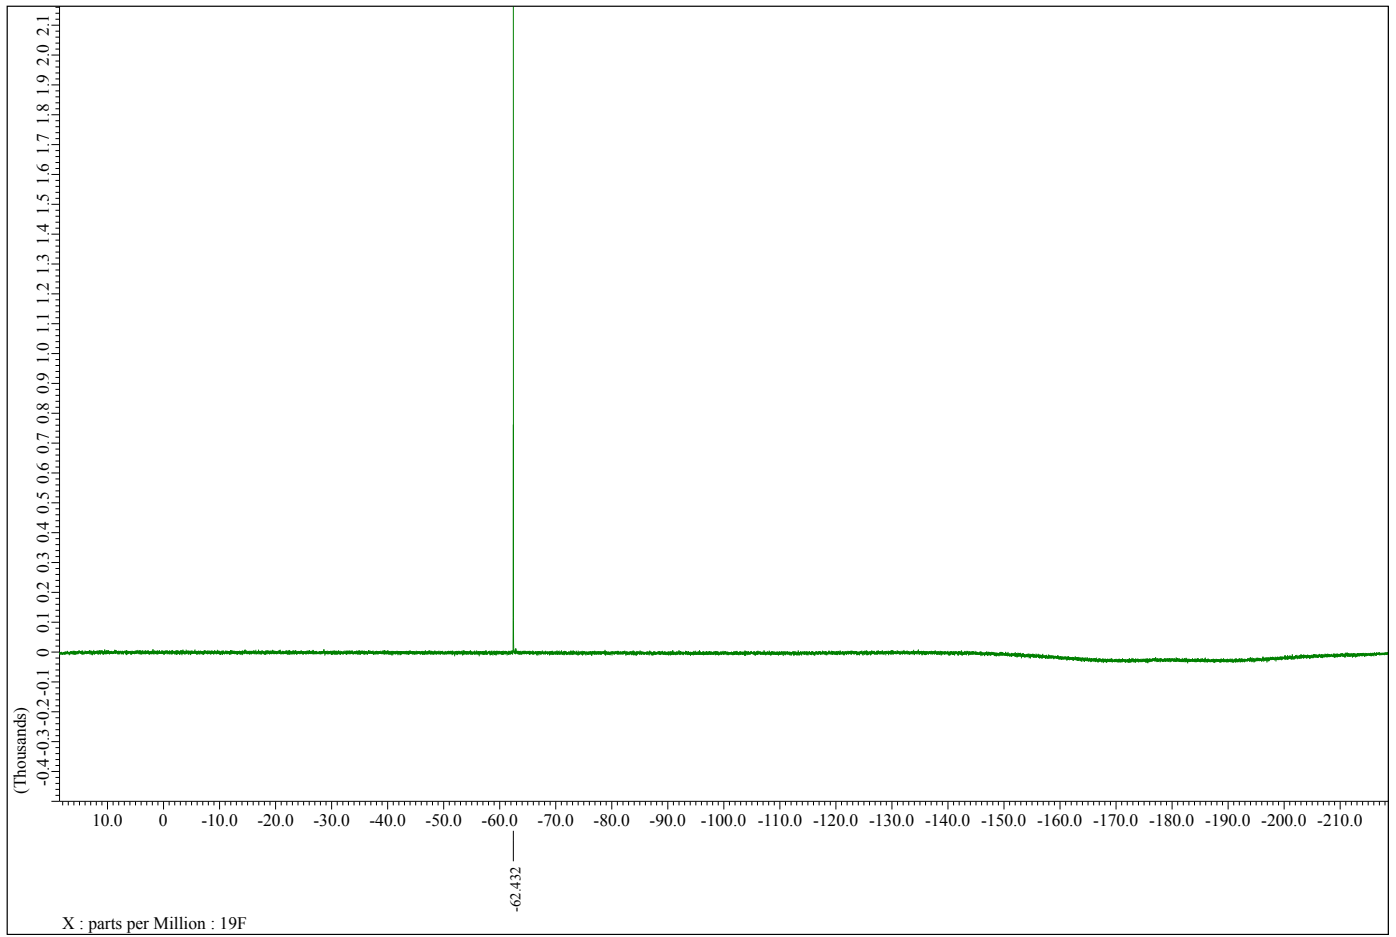

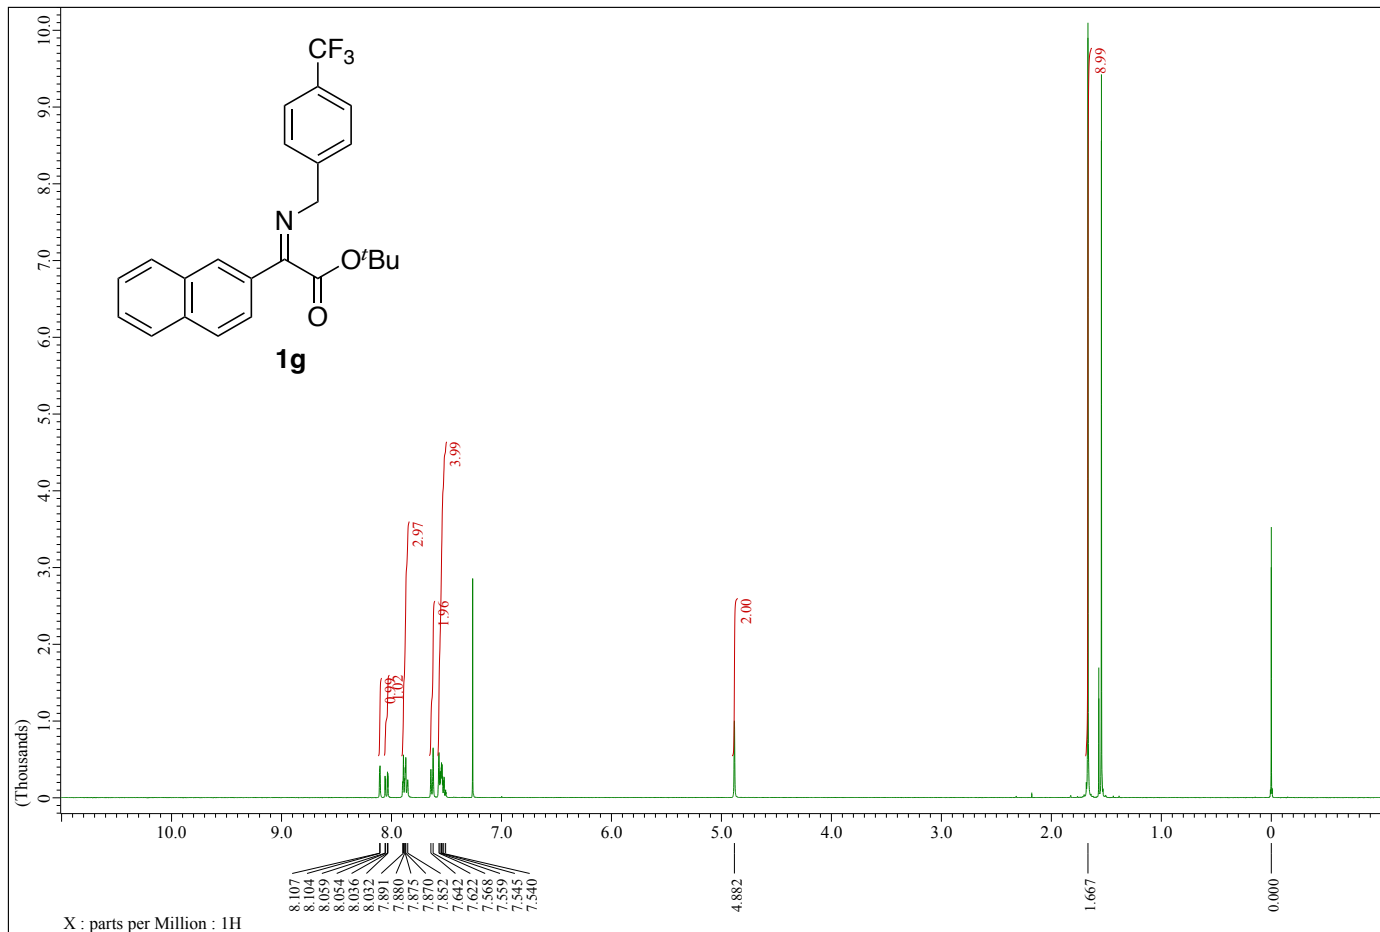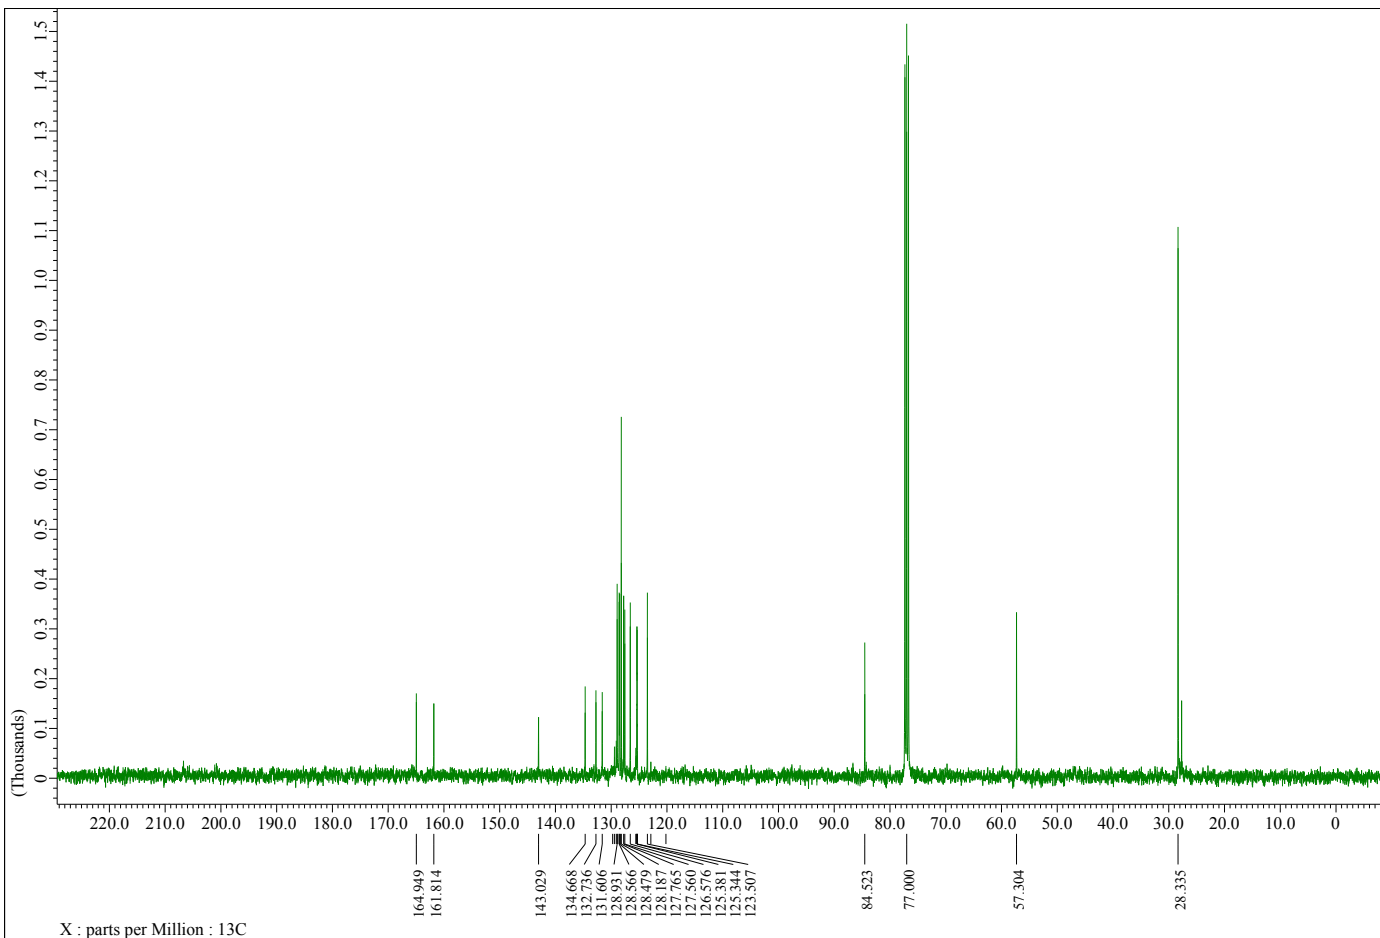

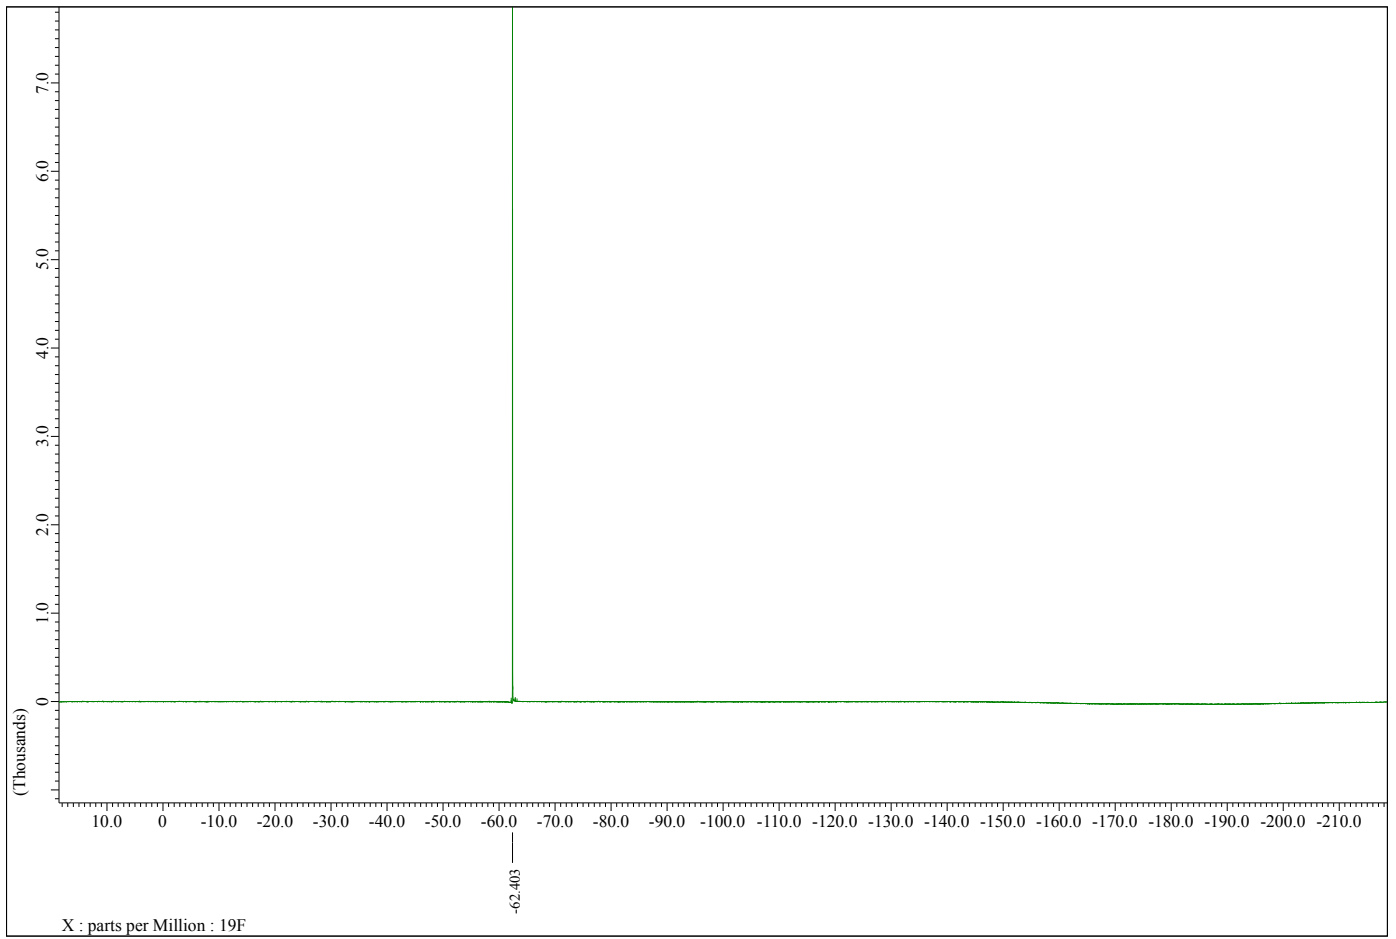

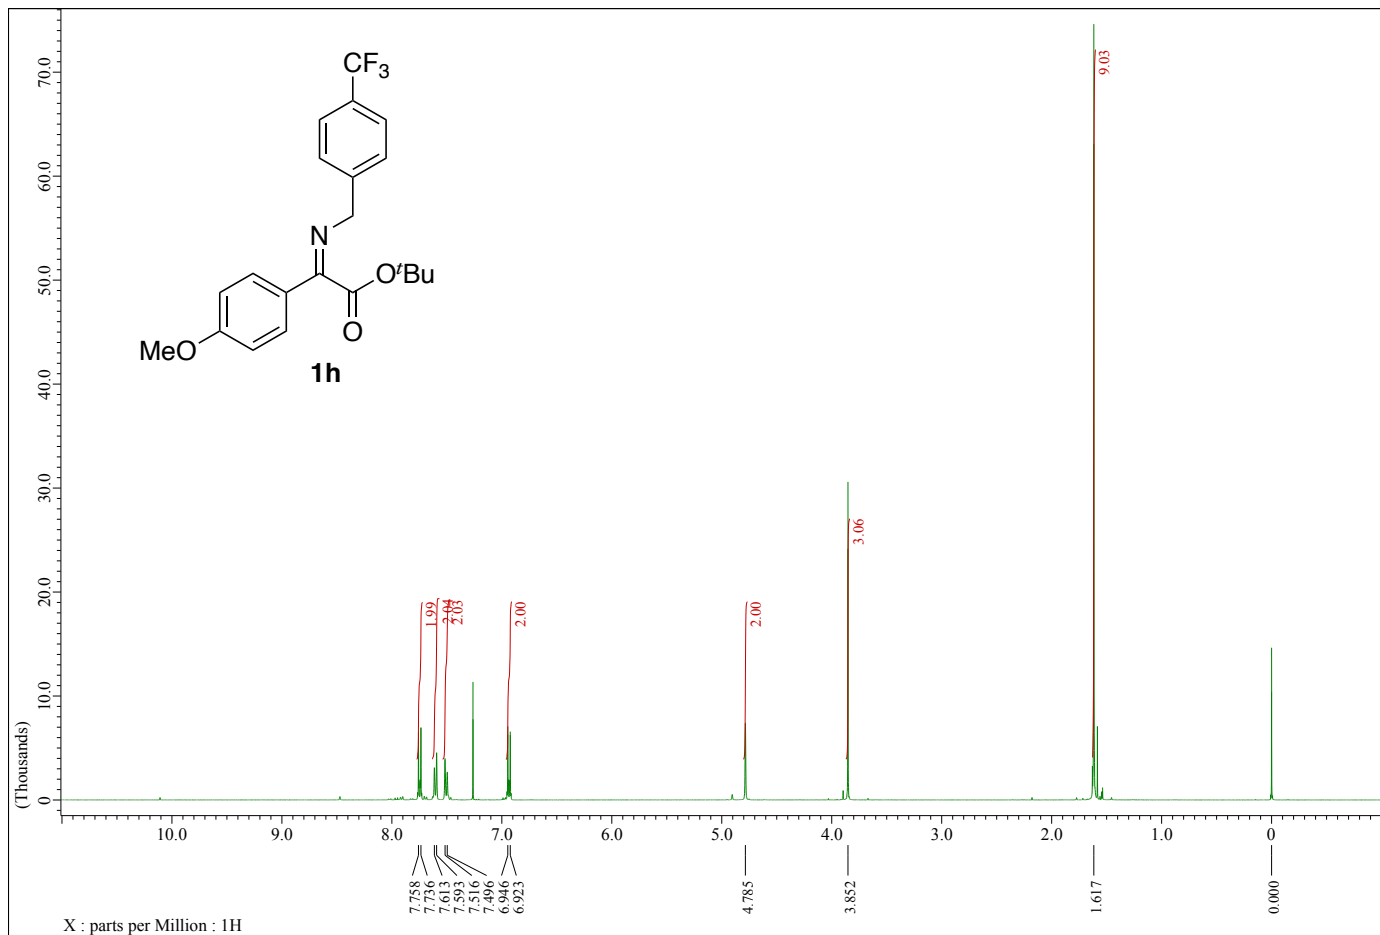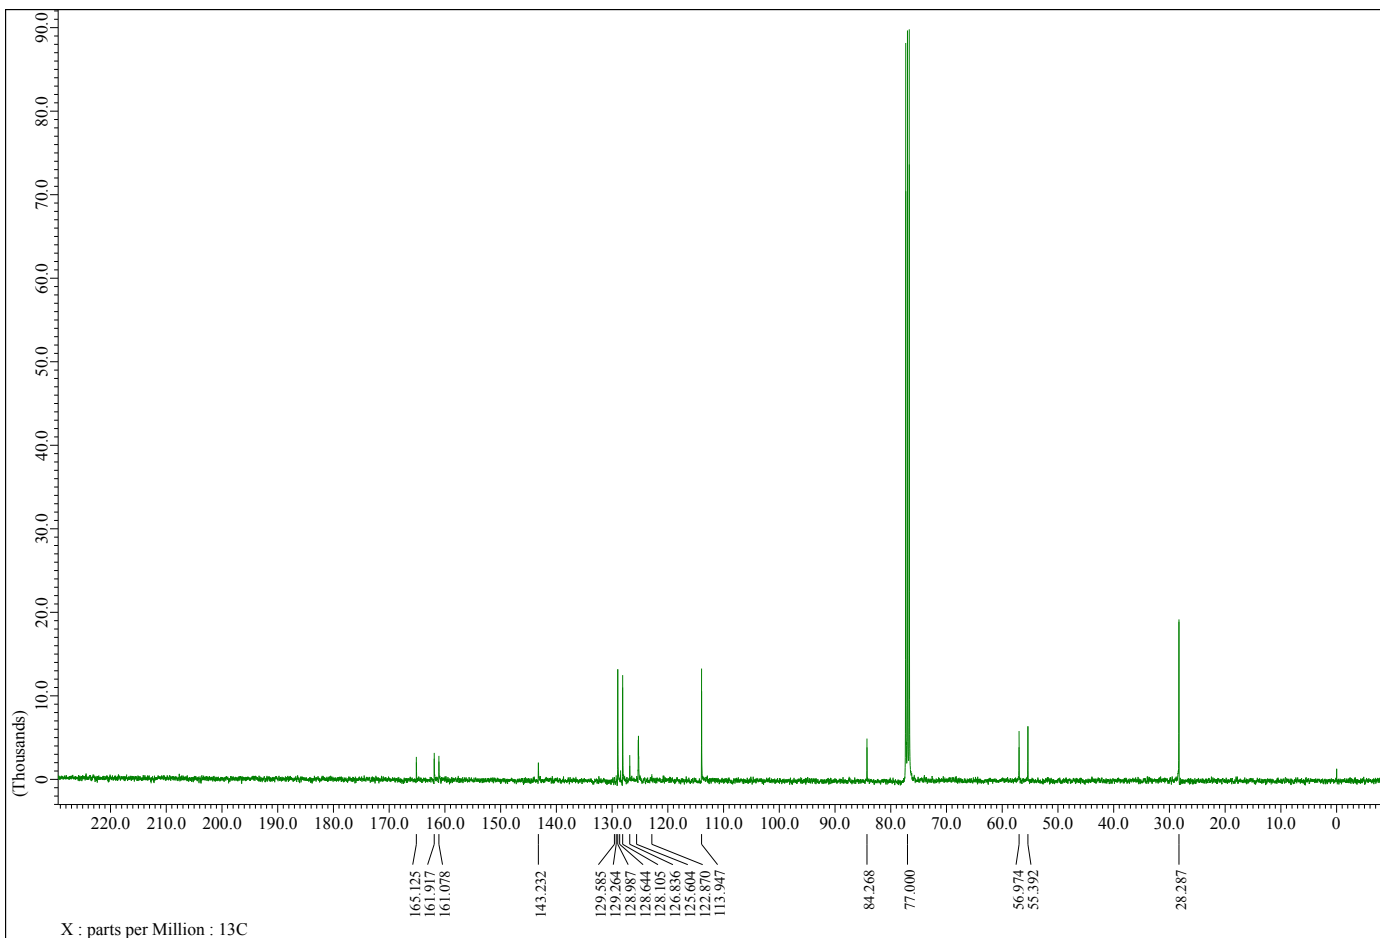

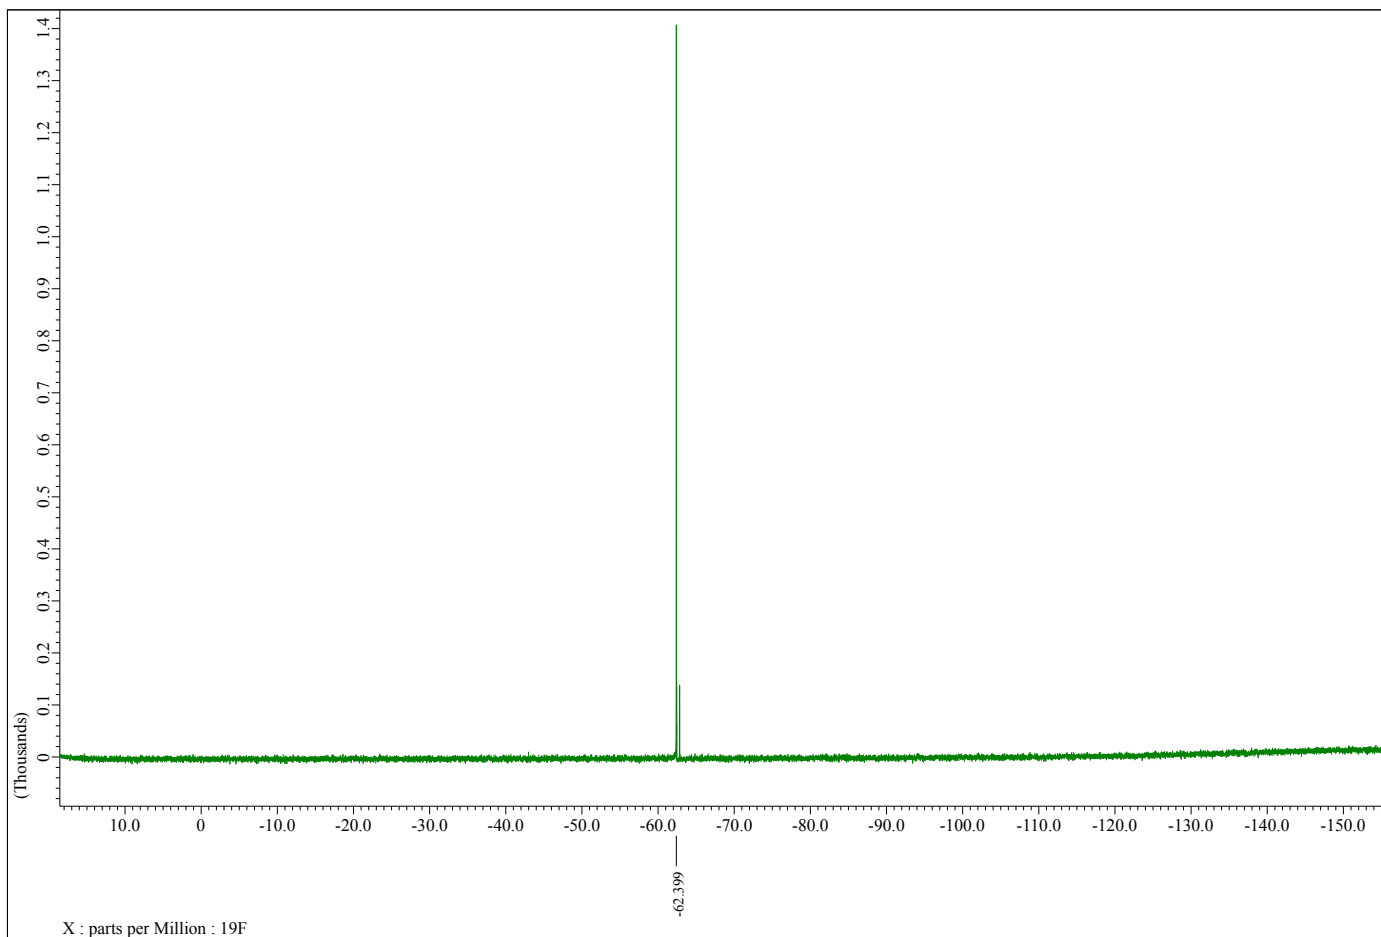

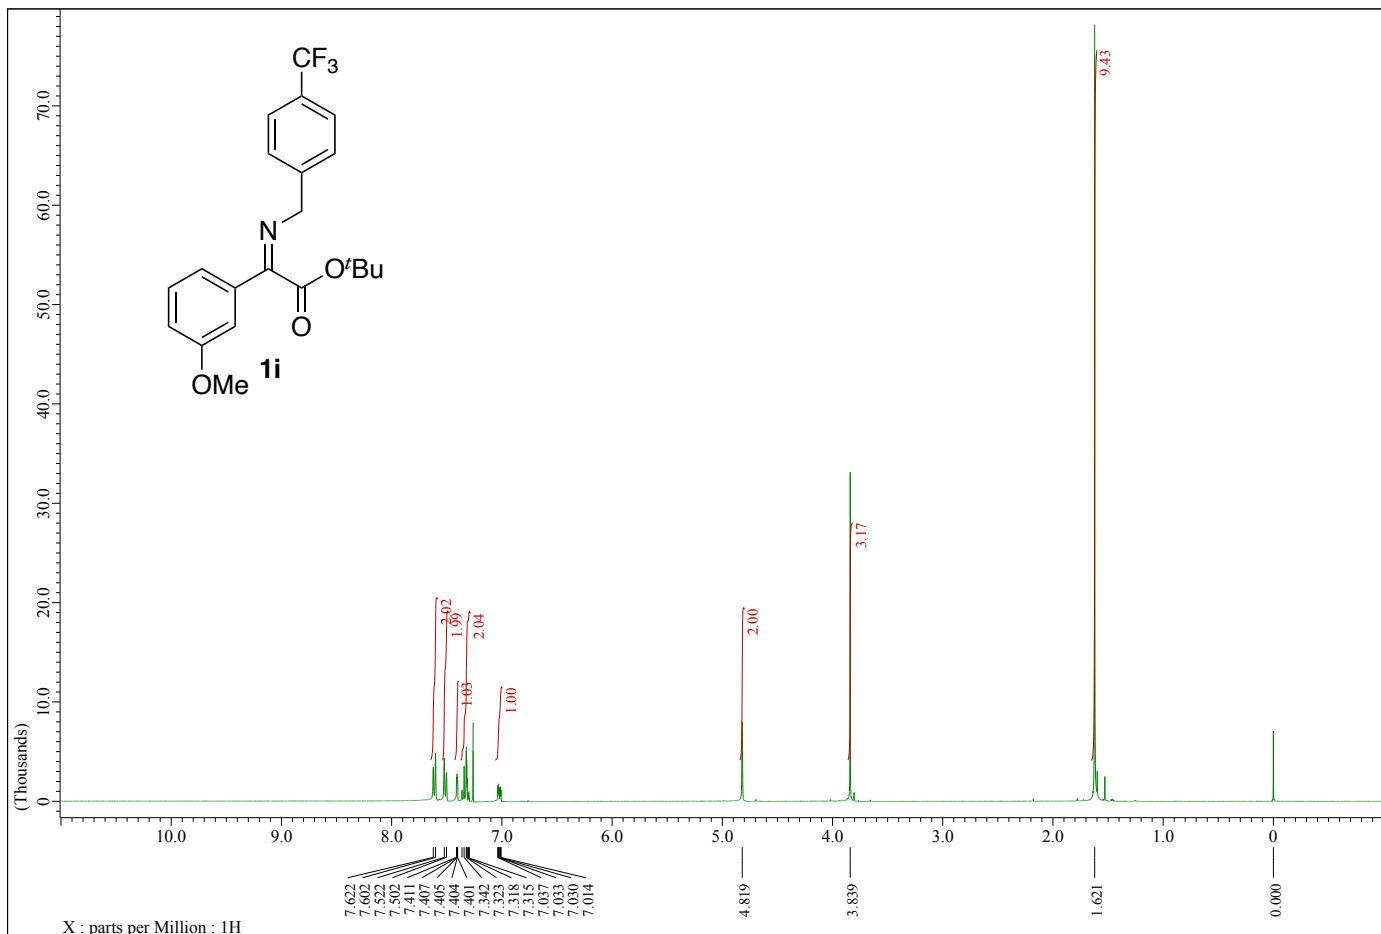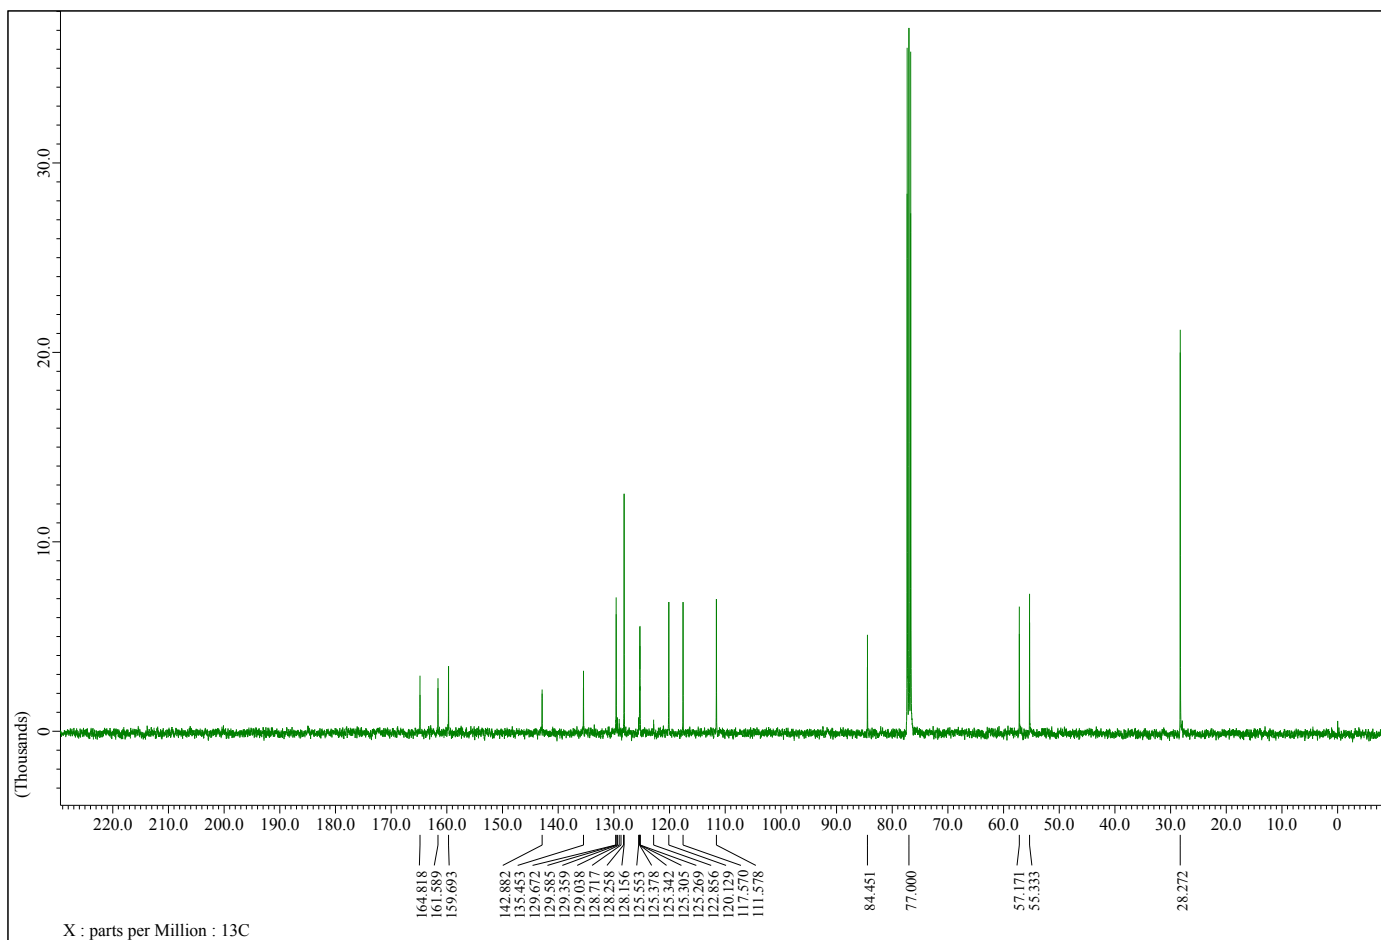



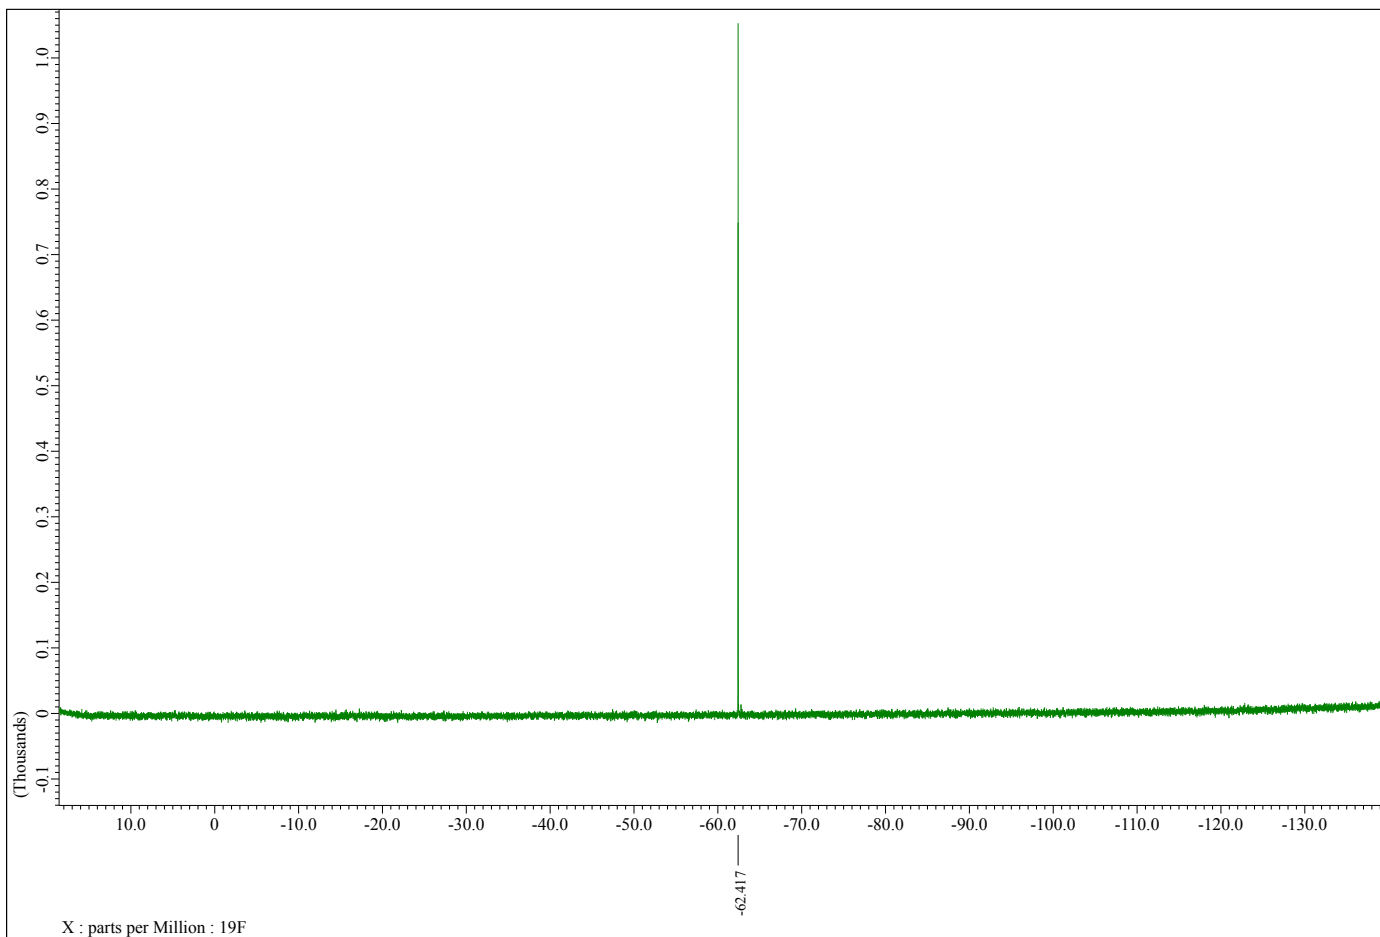

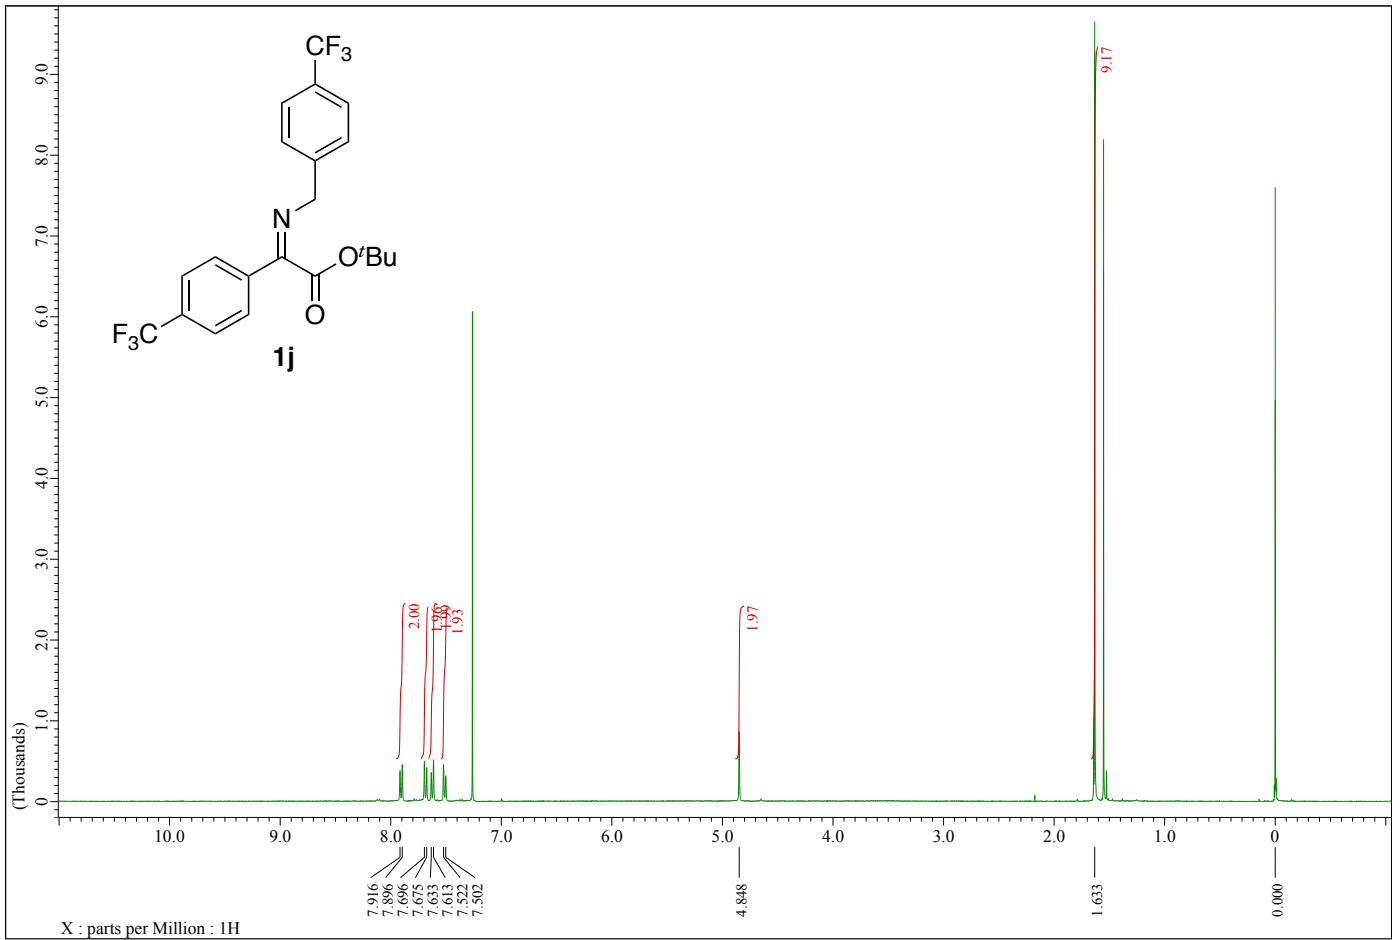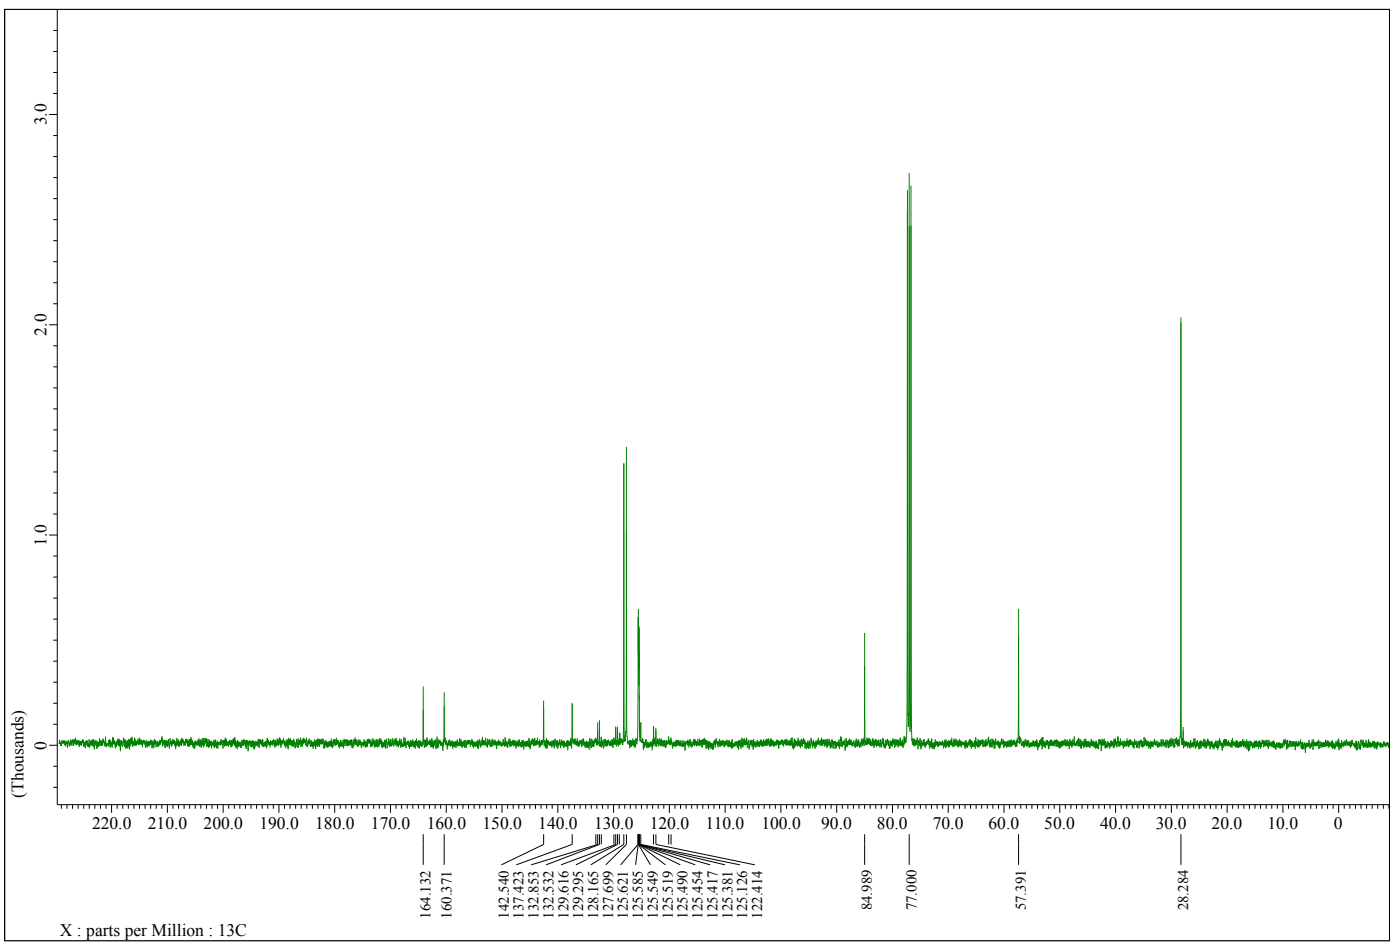

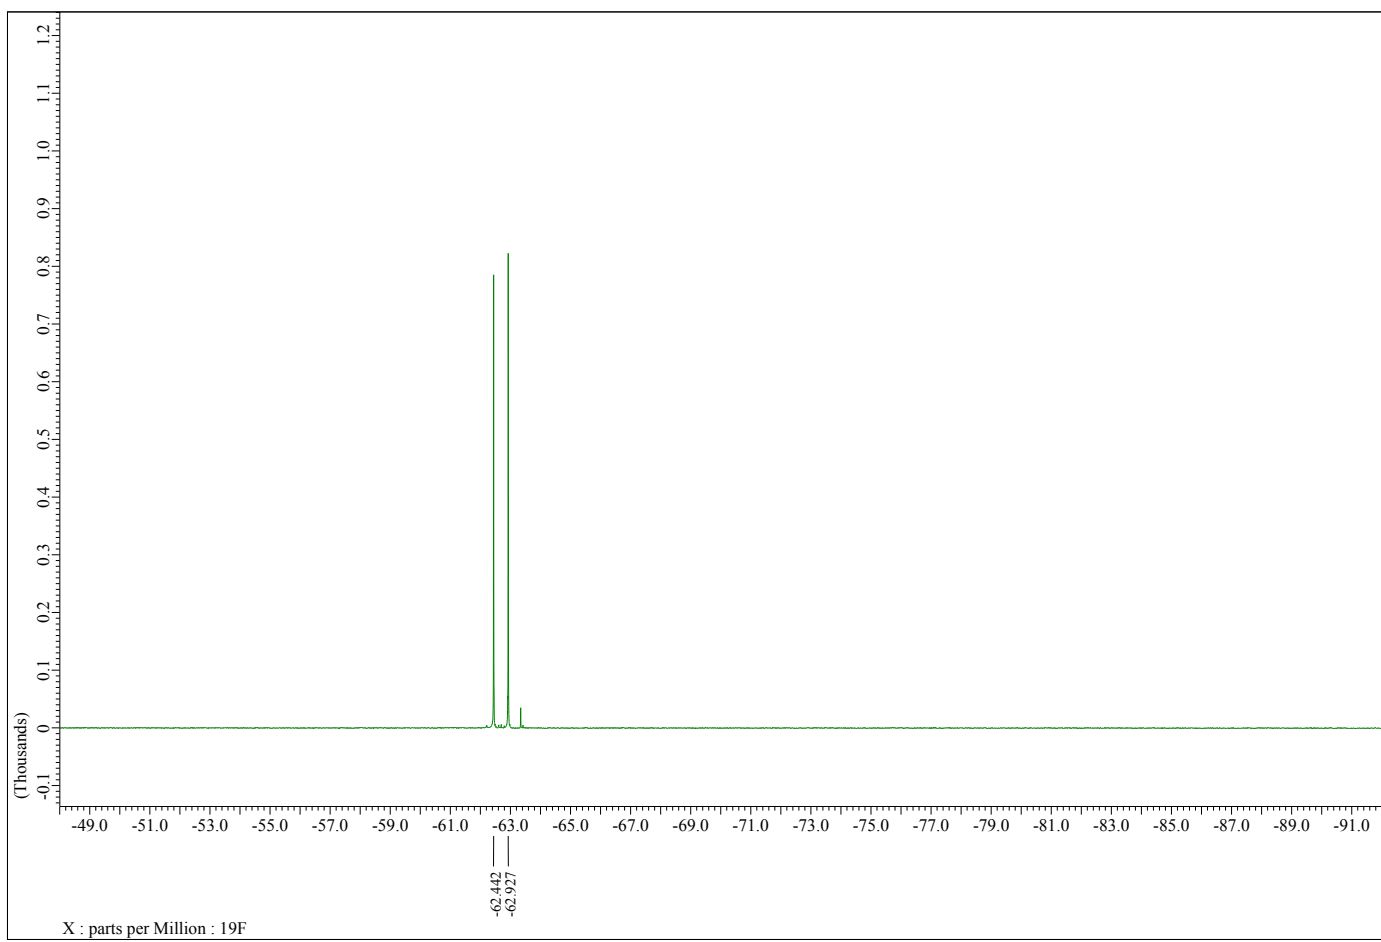

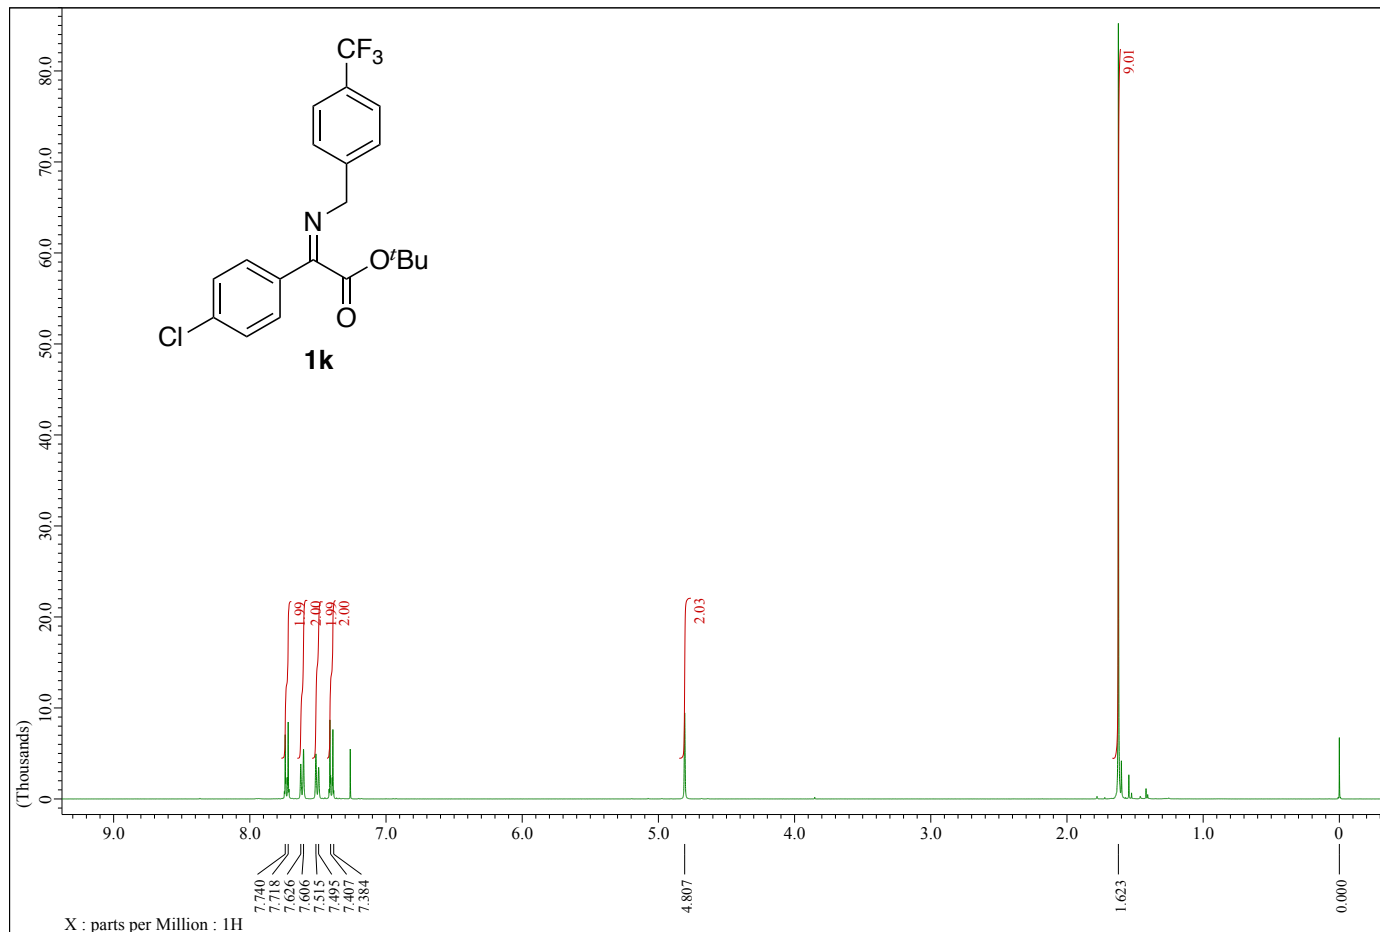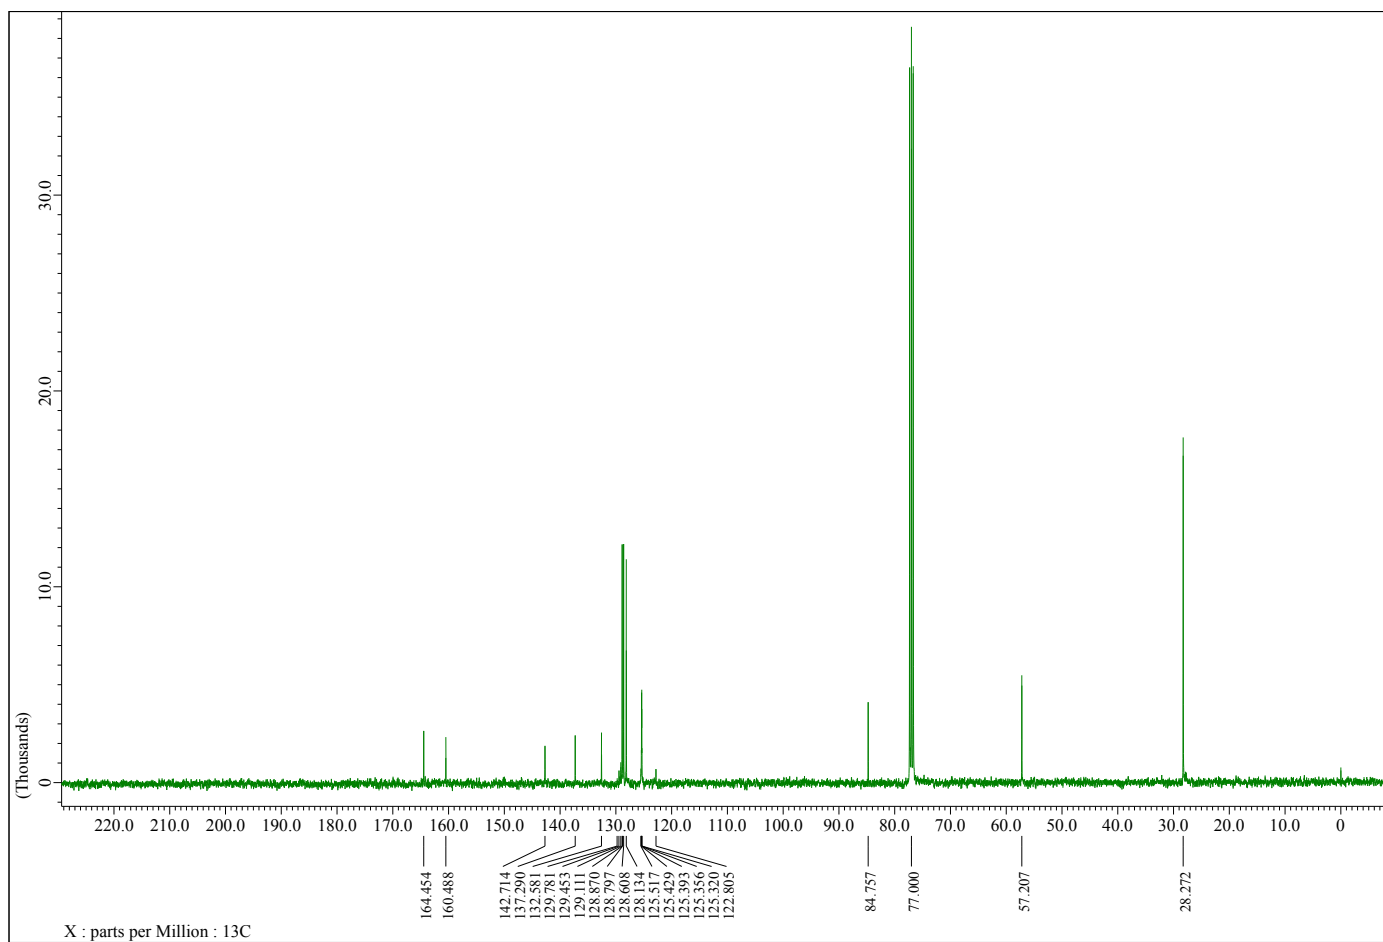

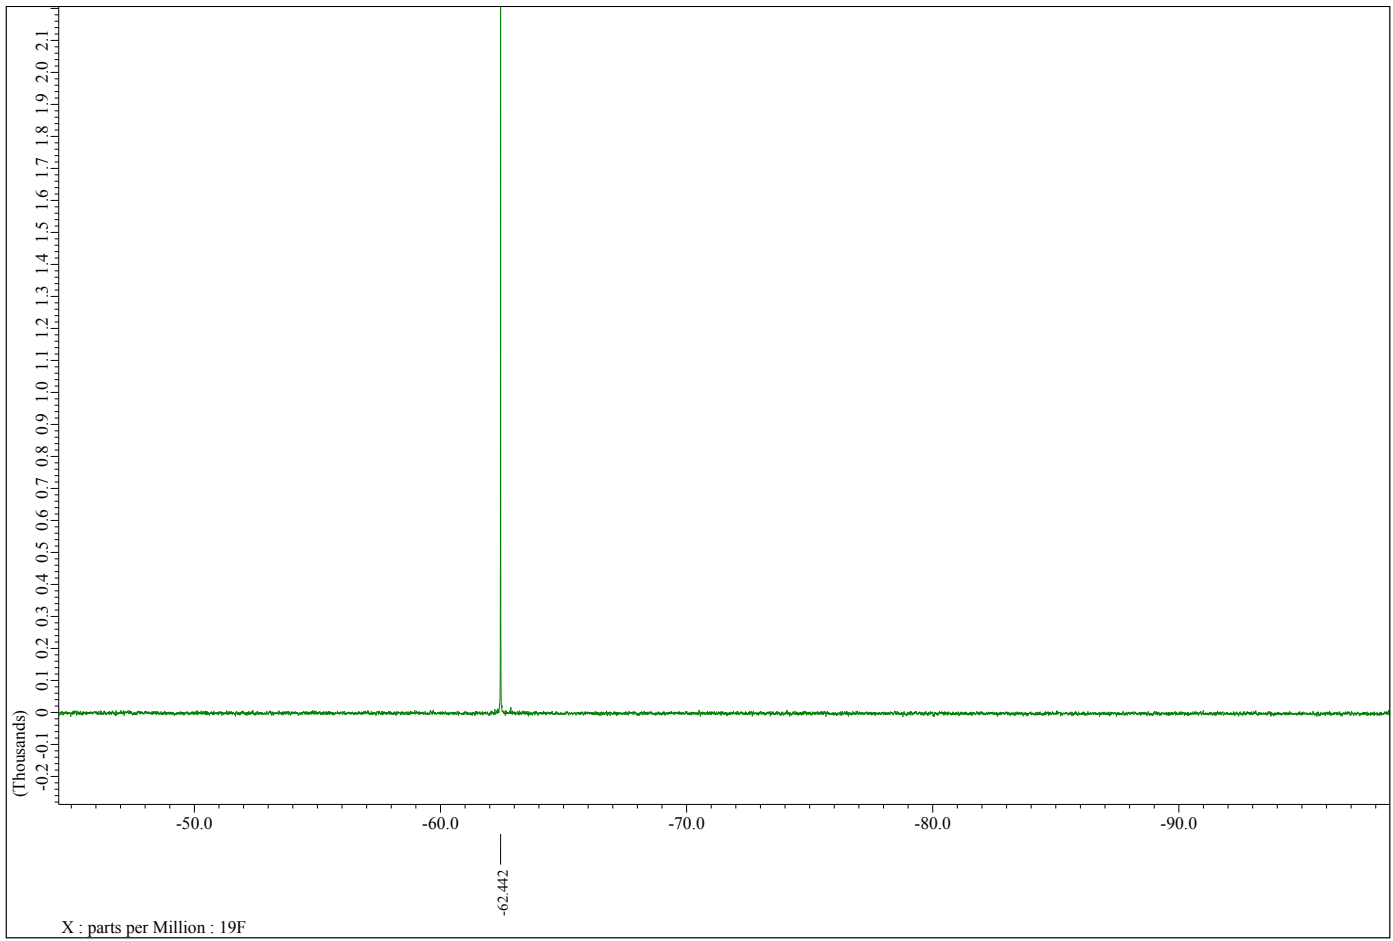

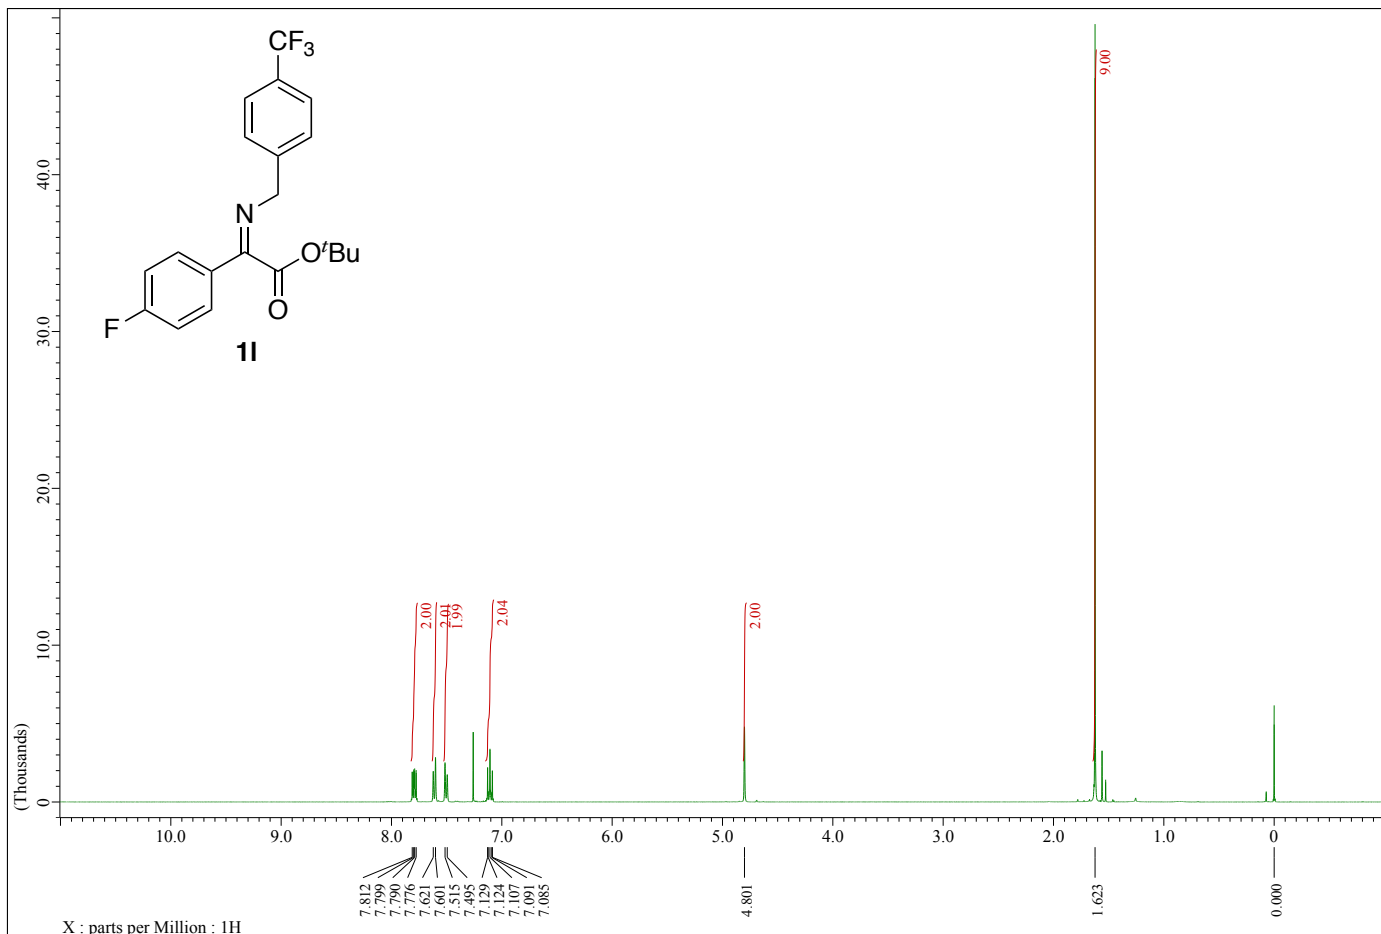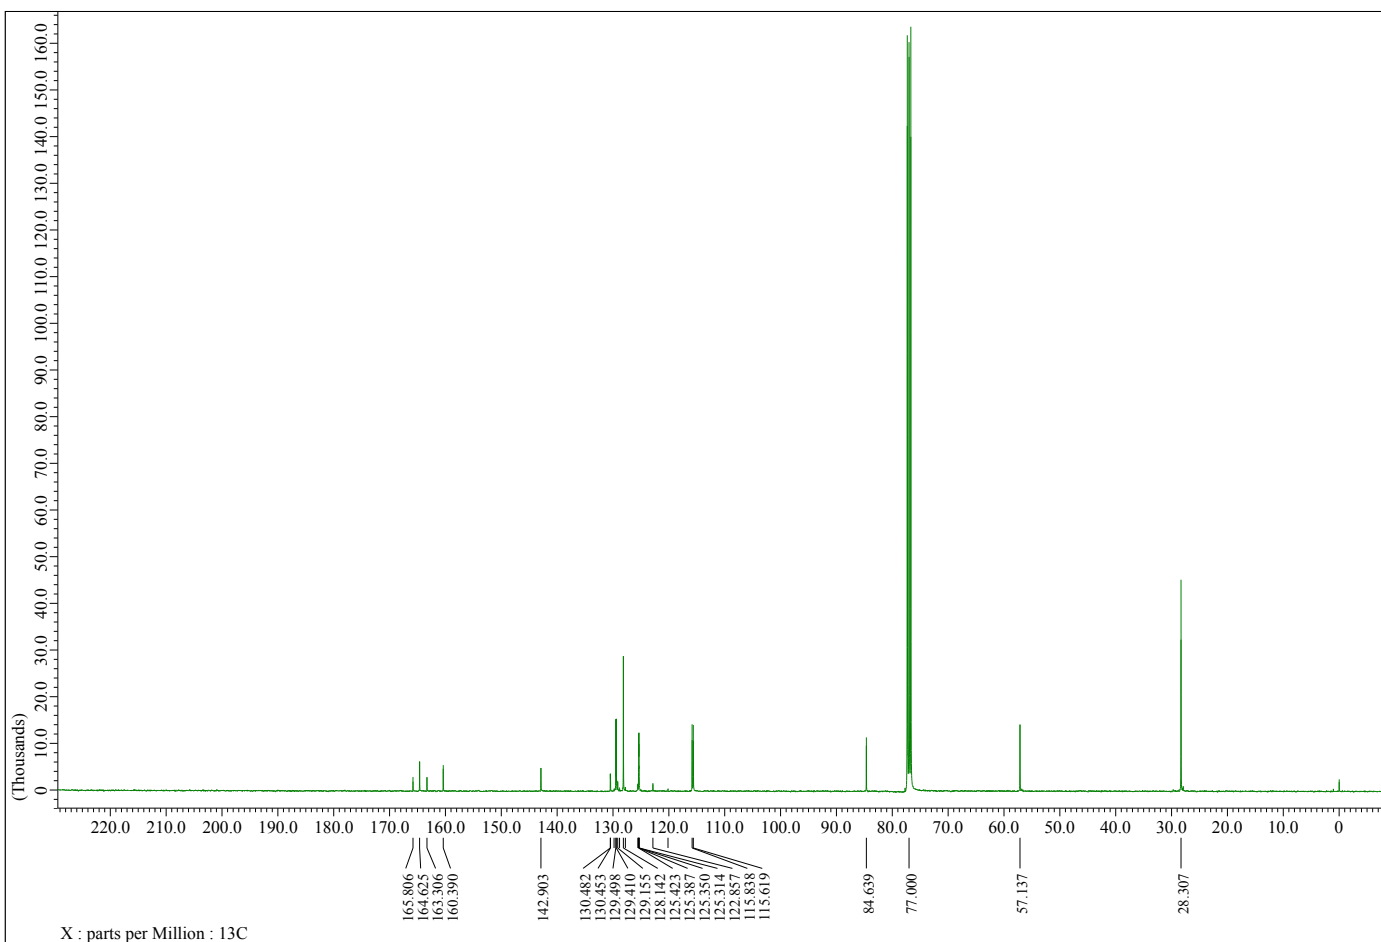

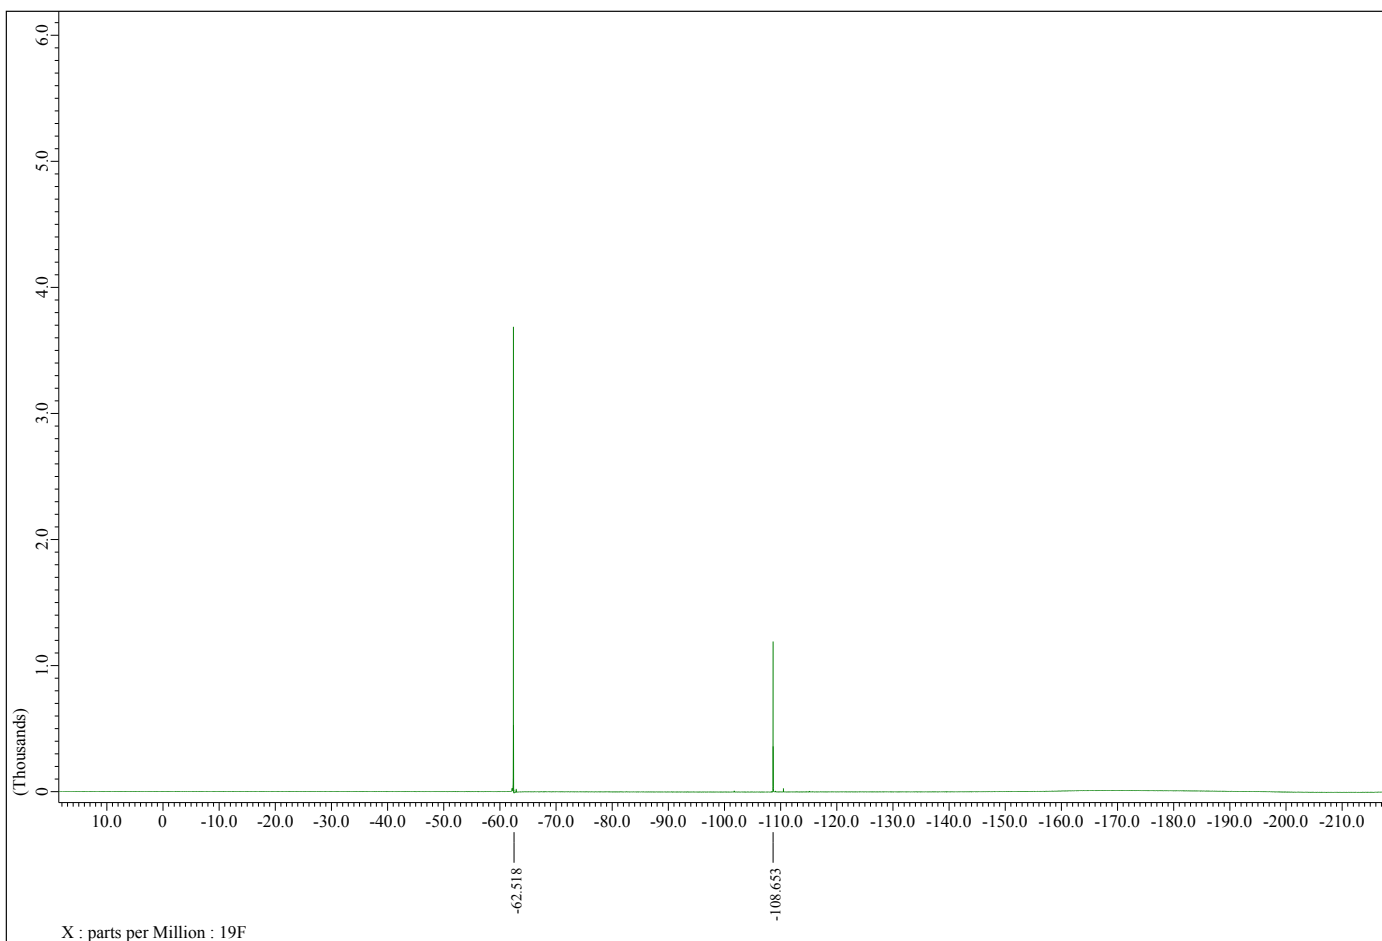

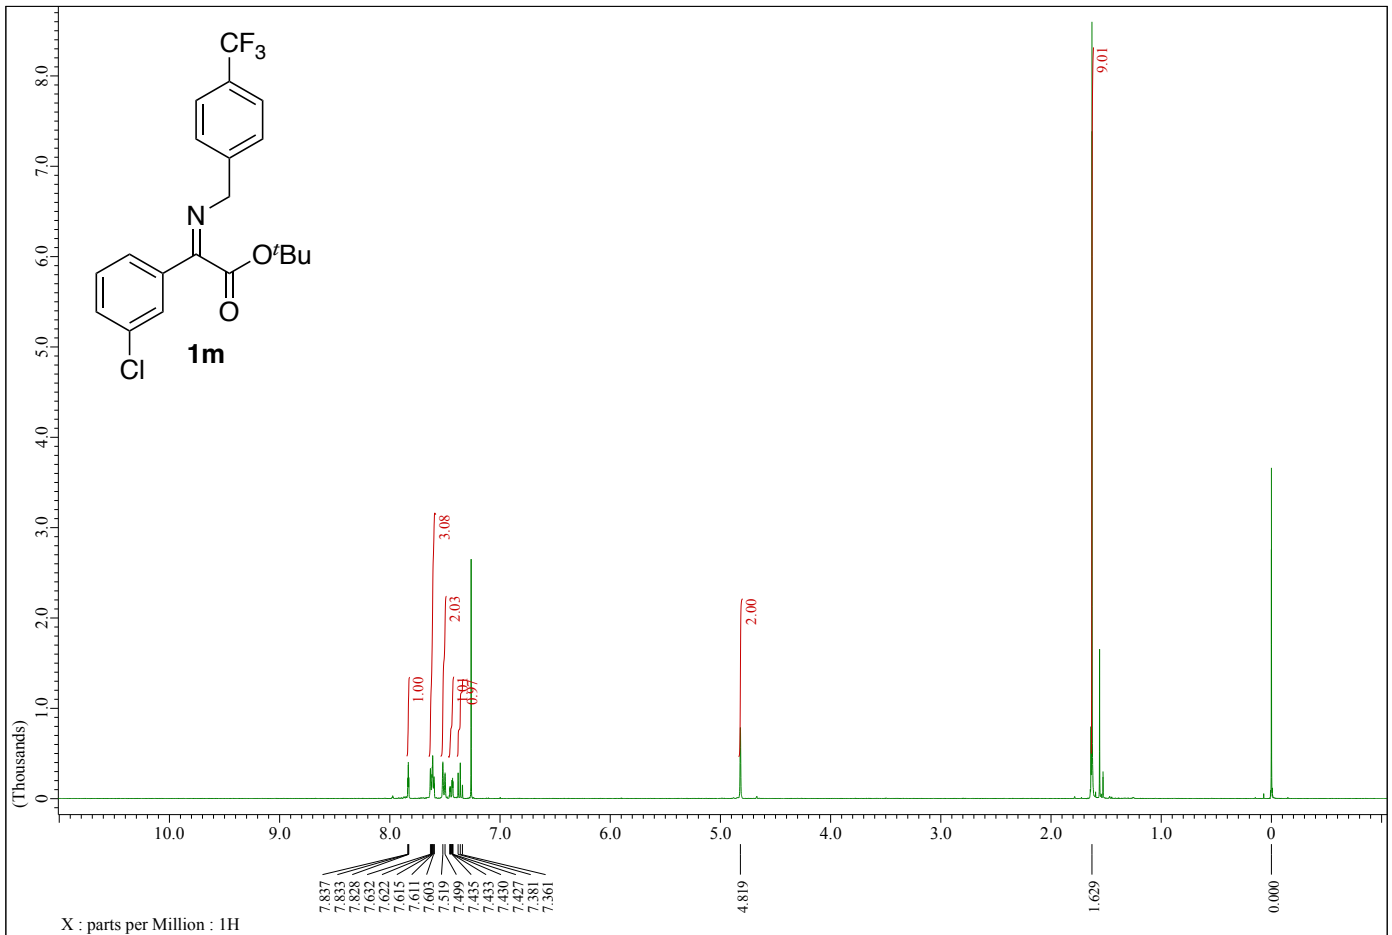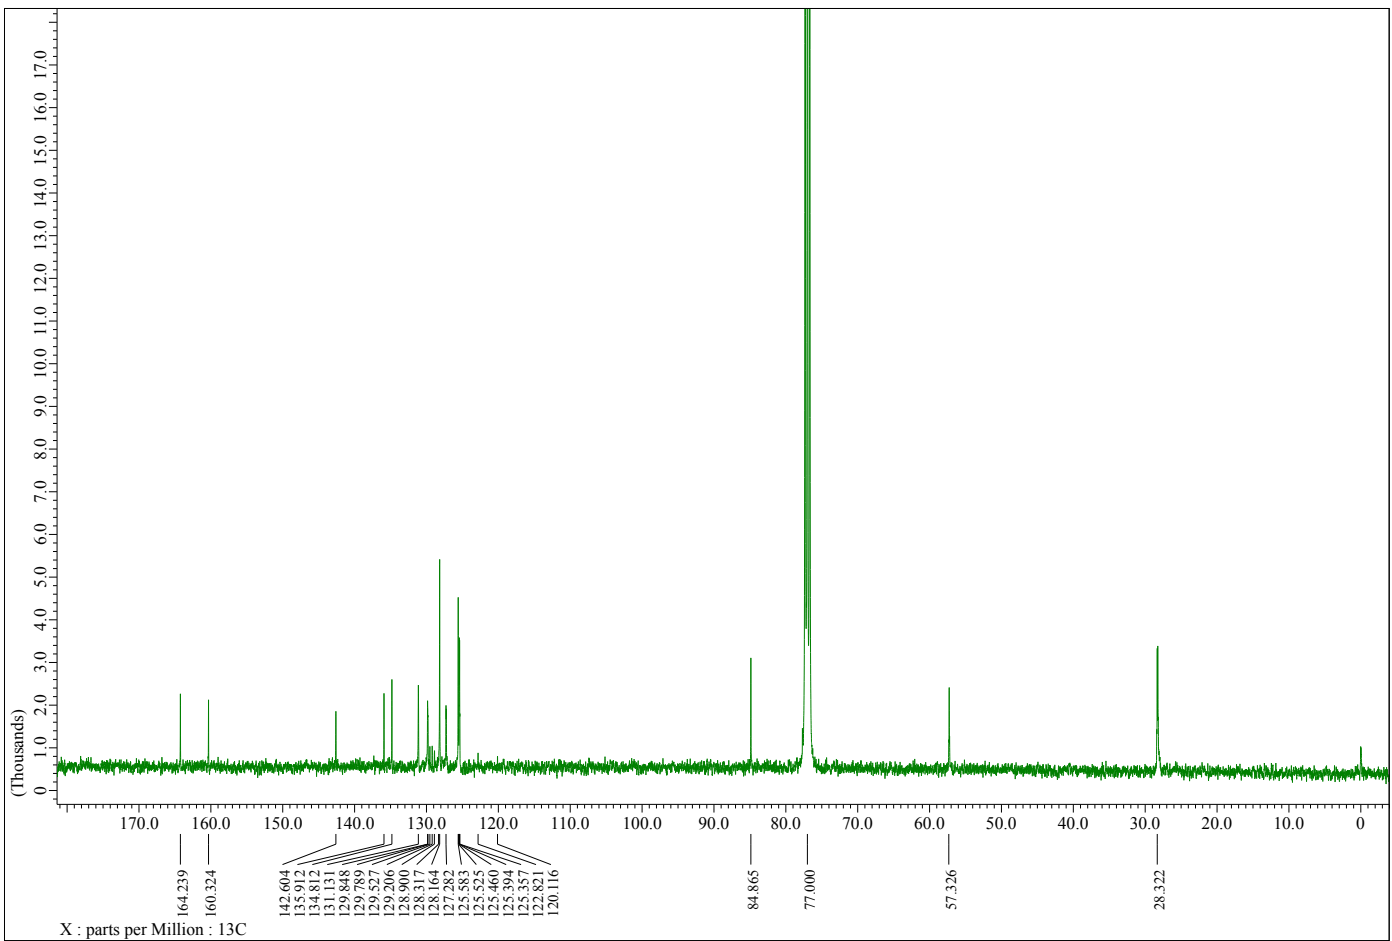



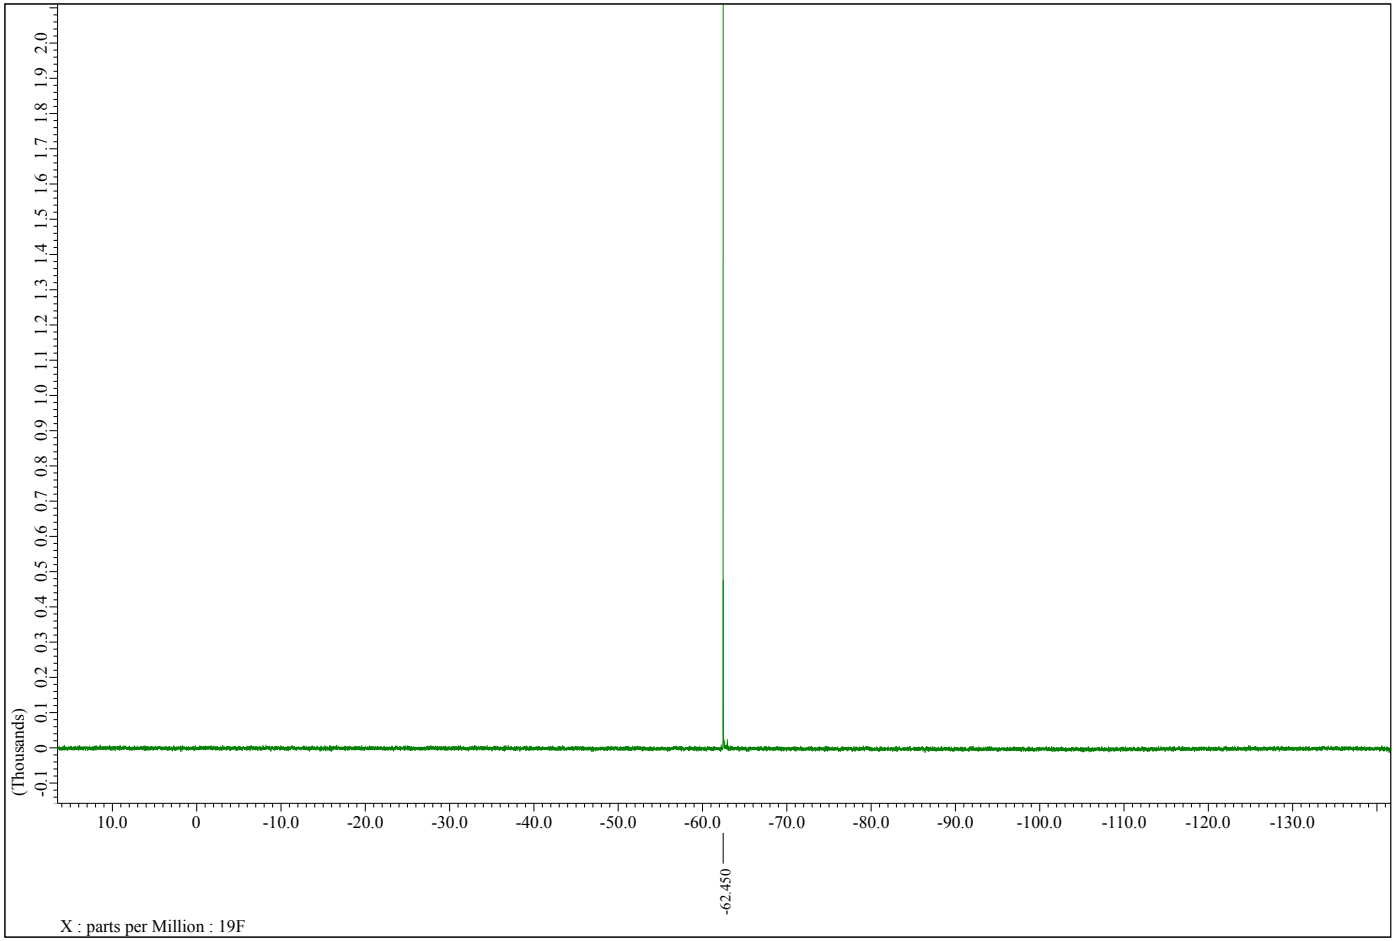

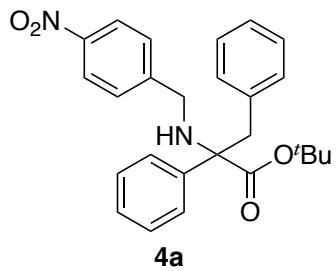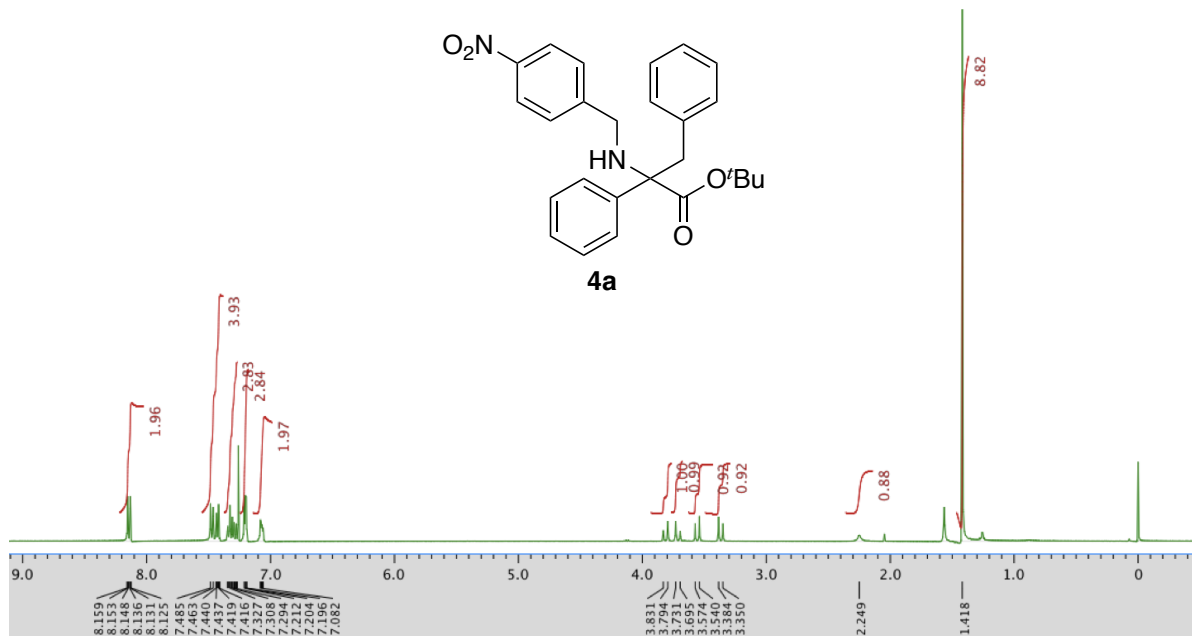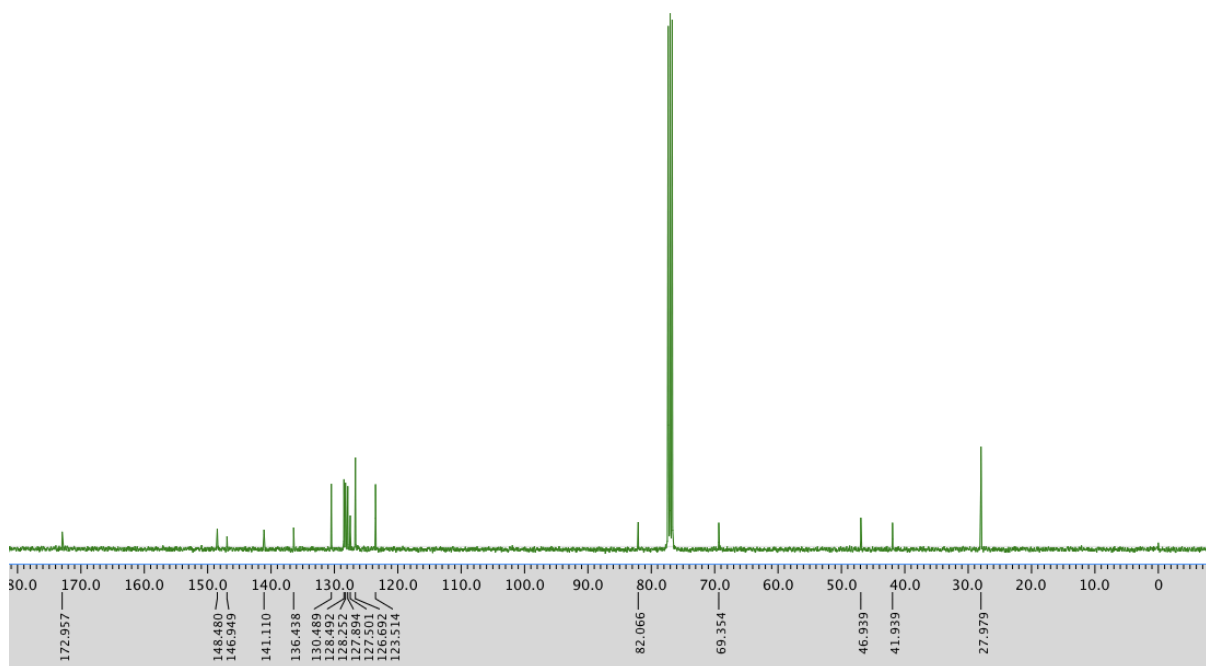

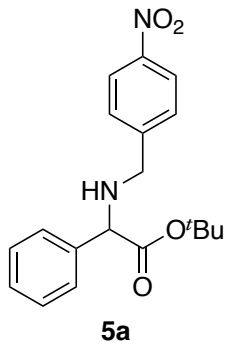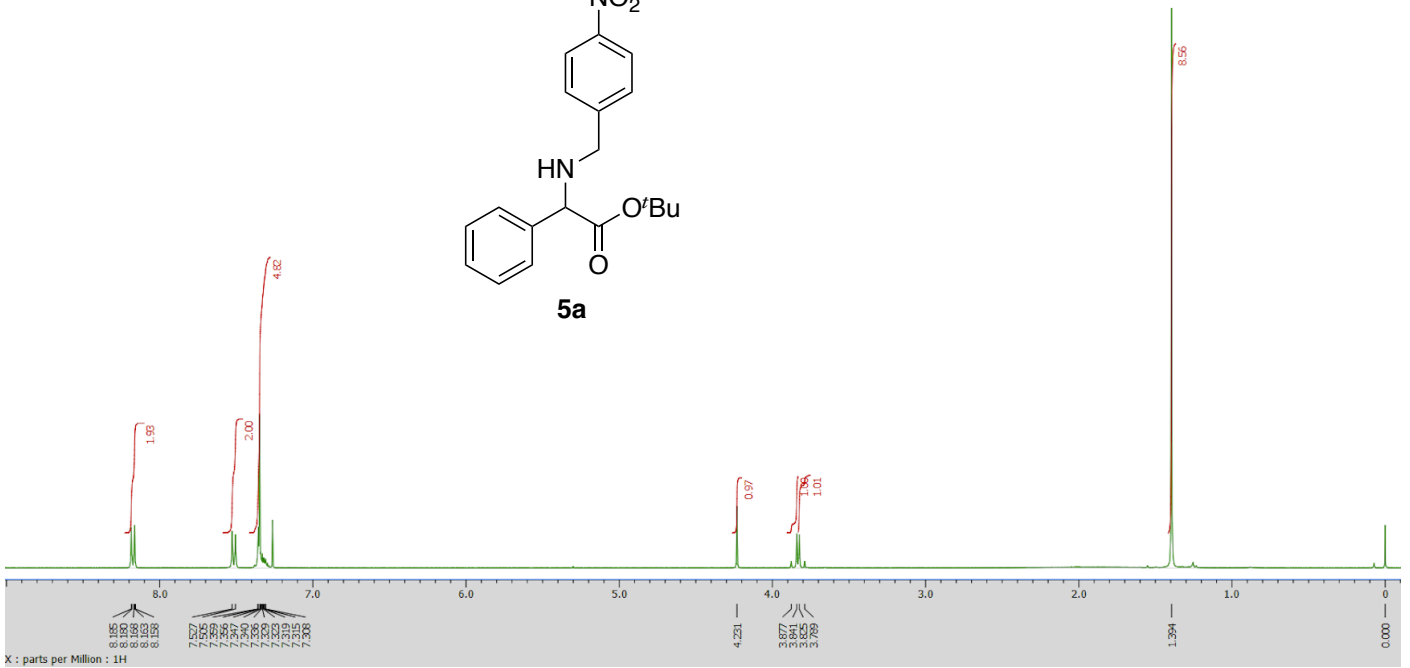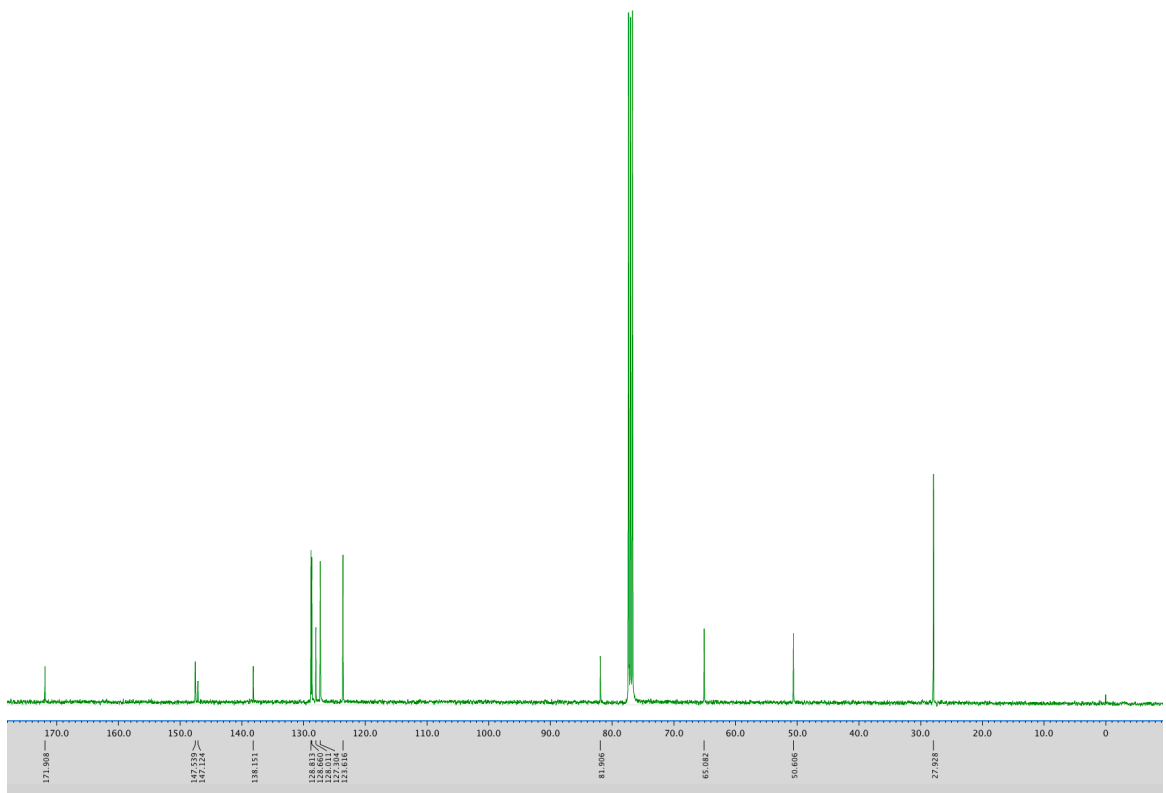

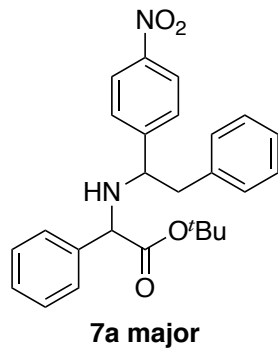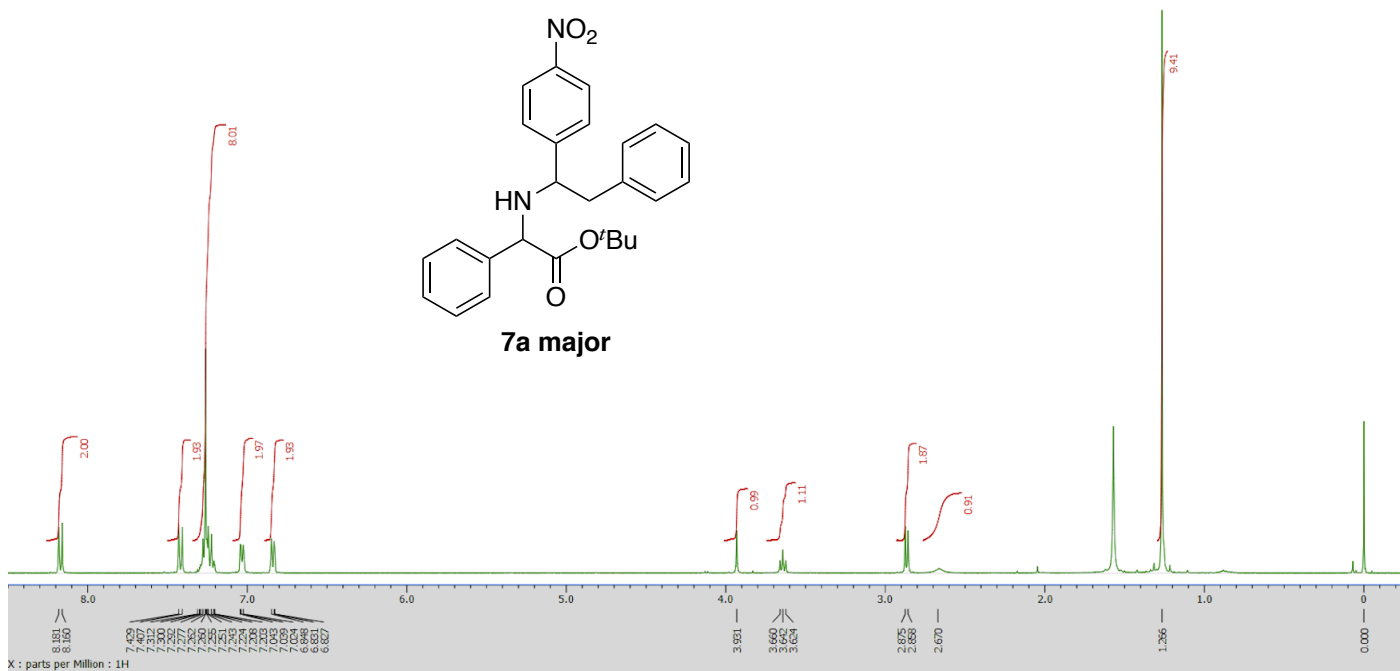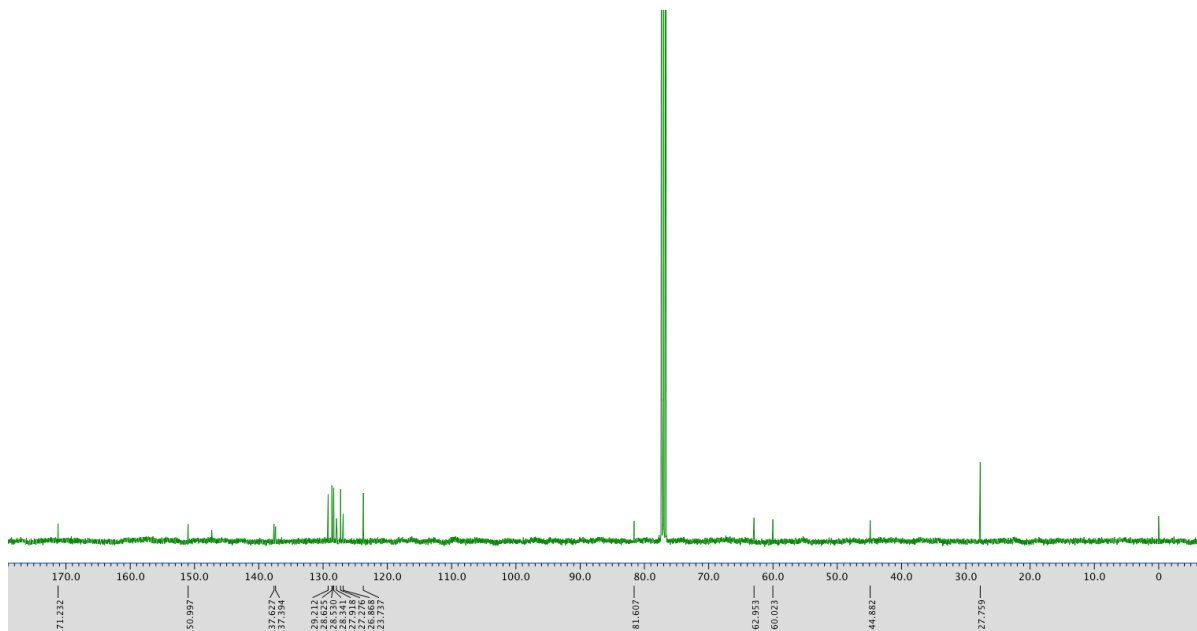

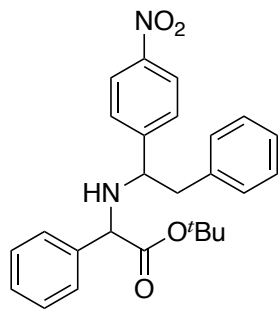

7a minor

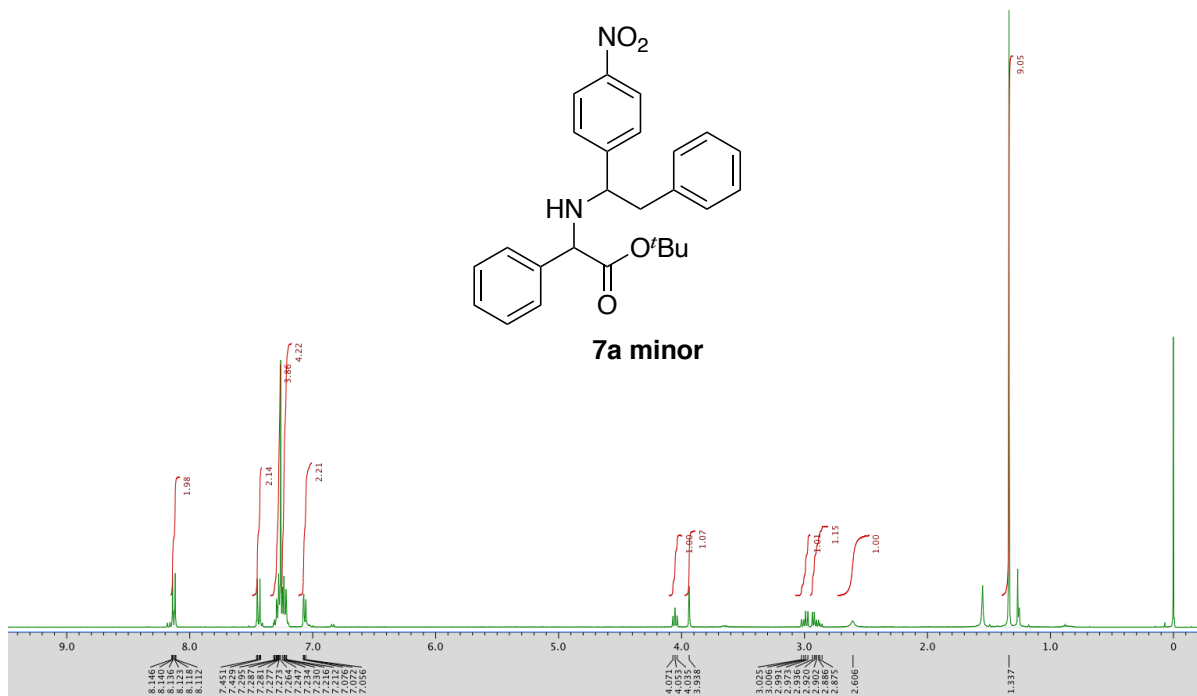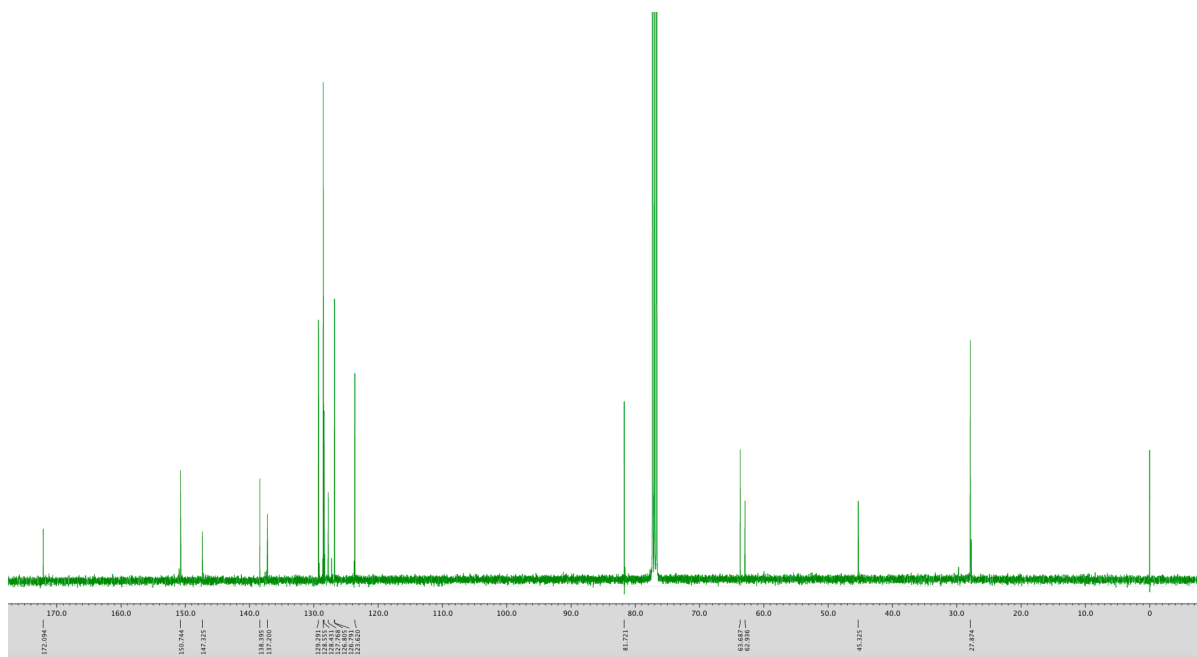

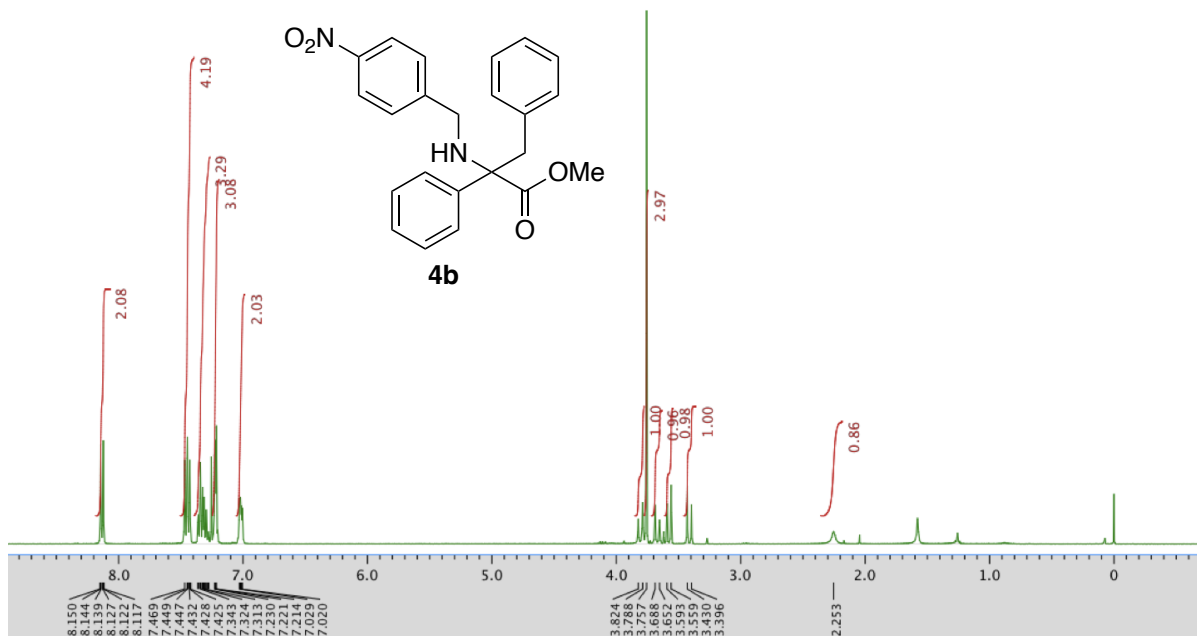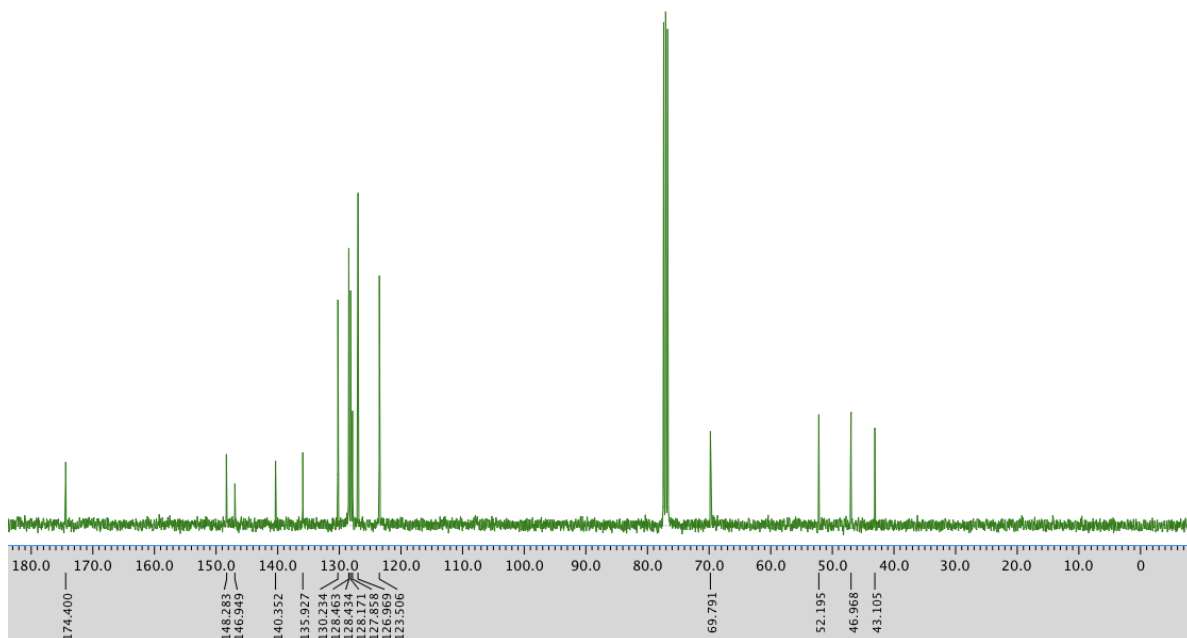



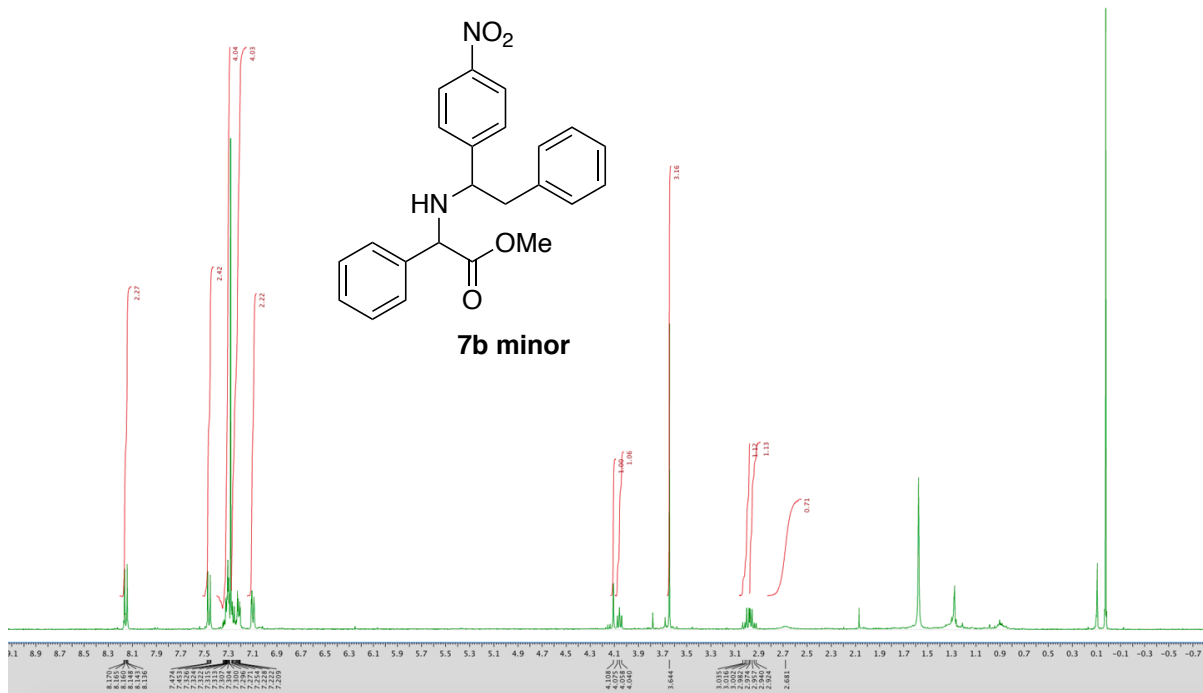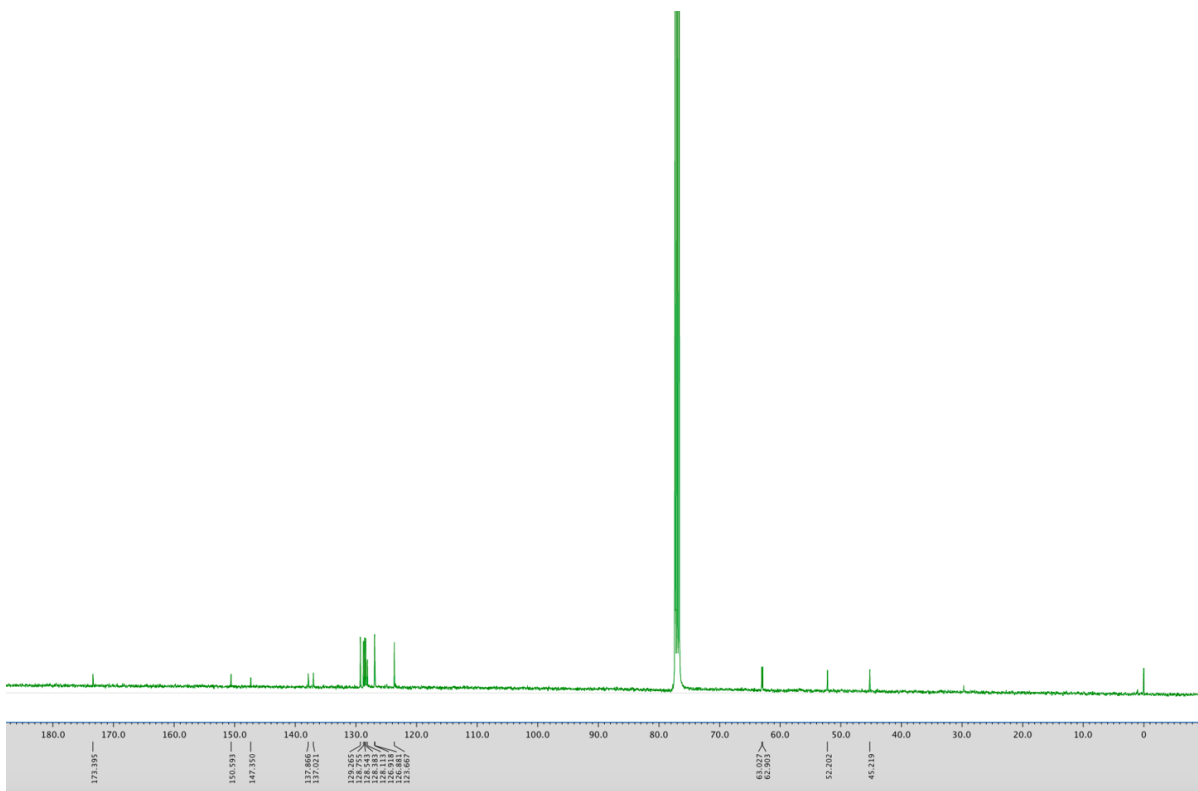



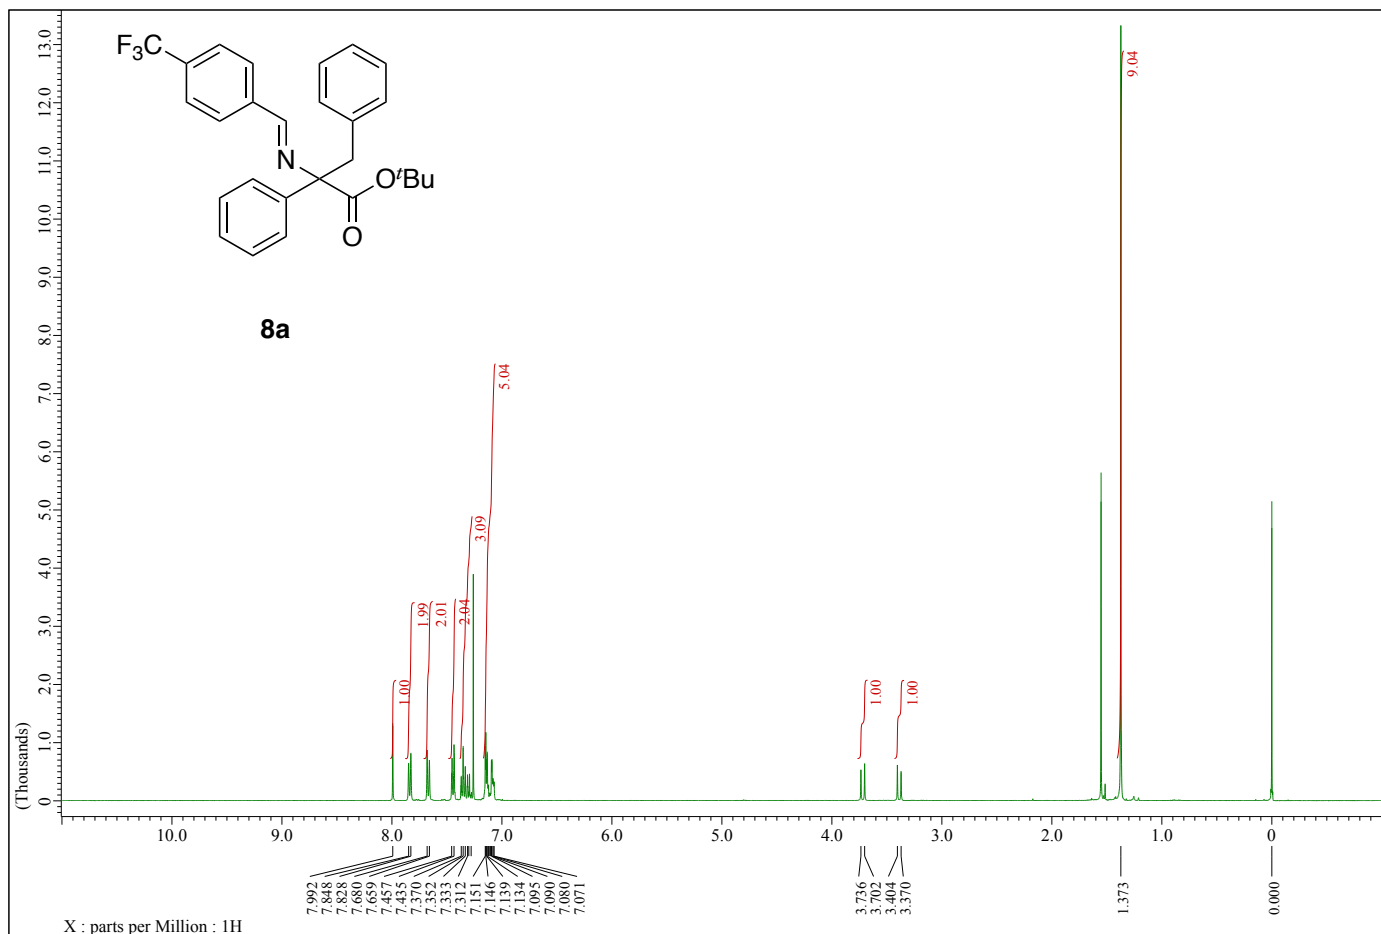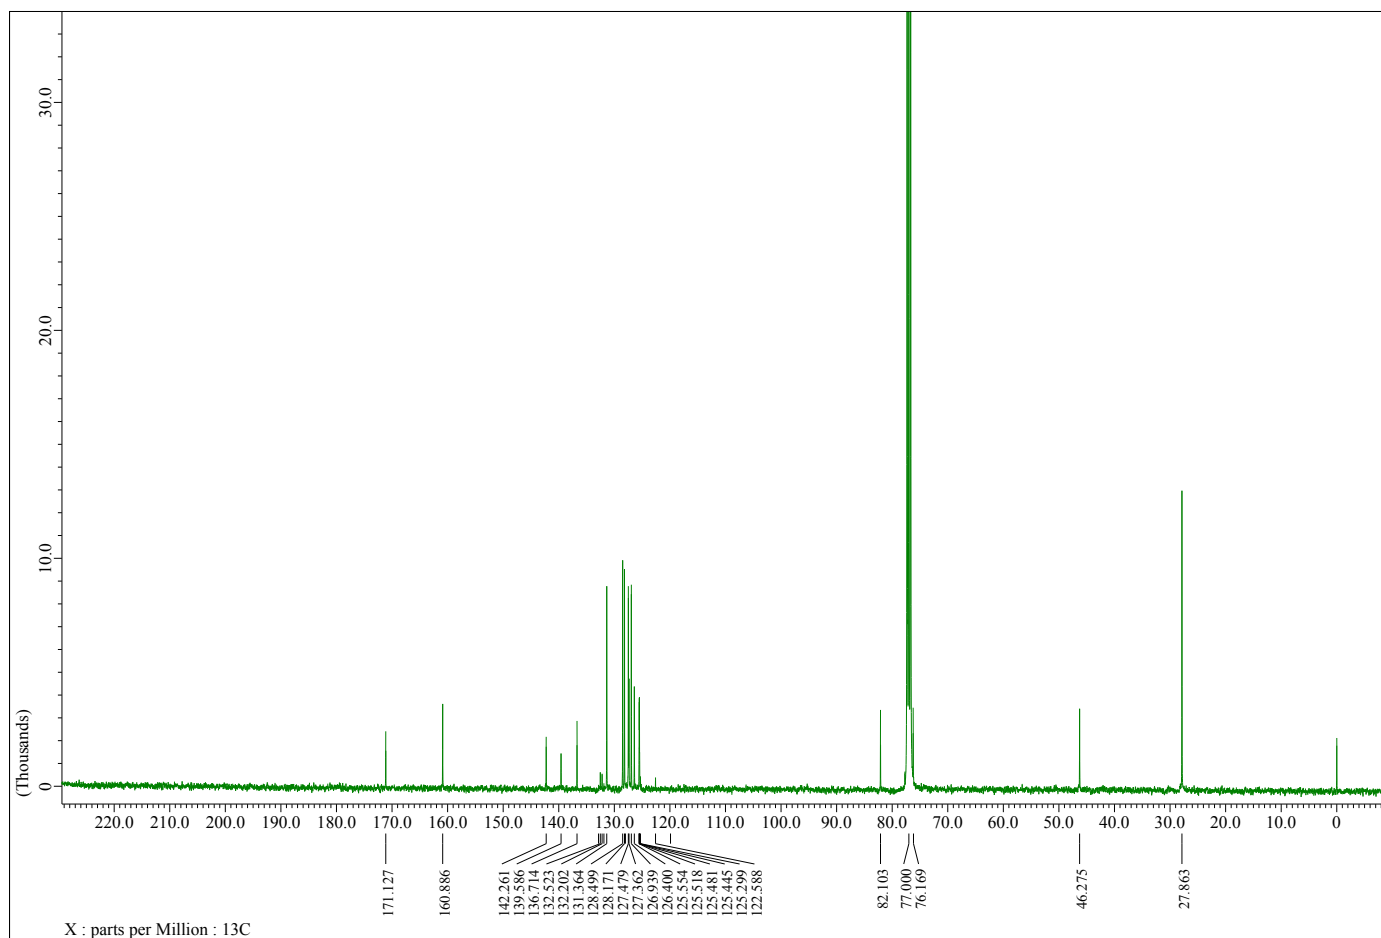

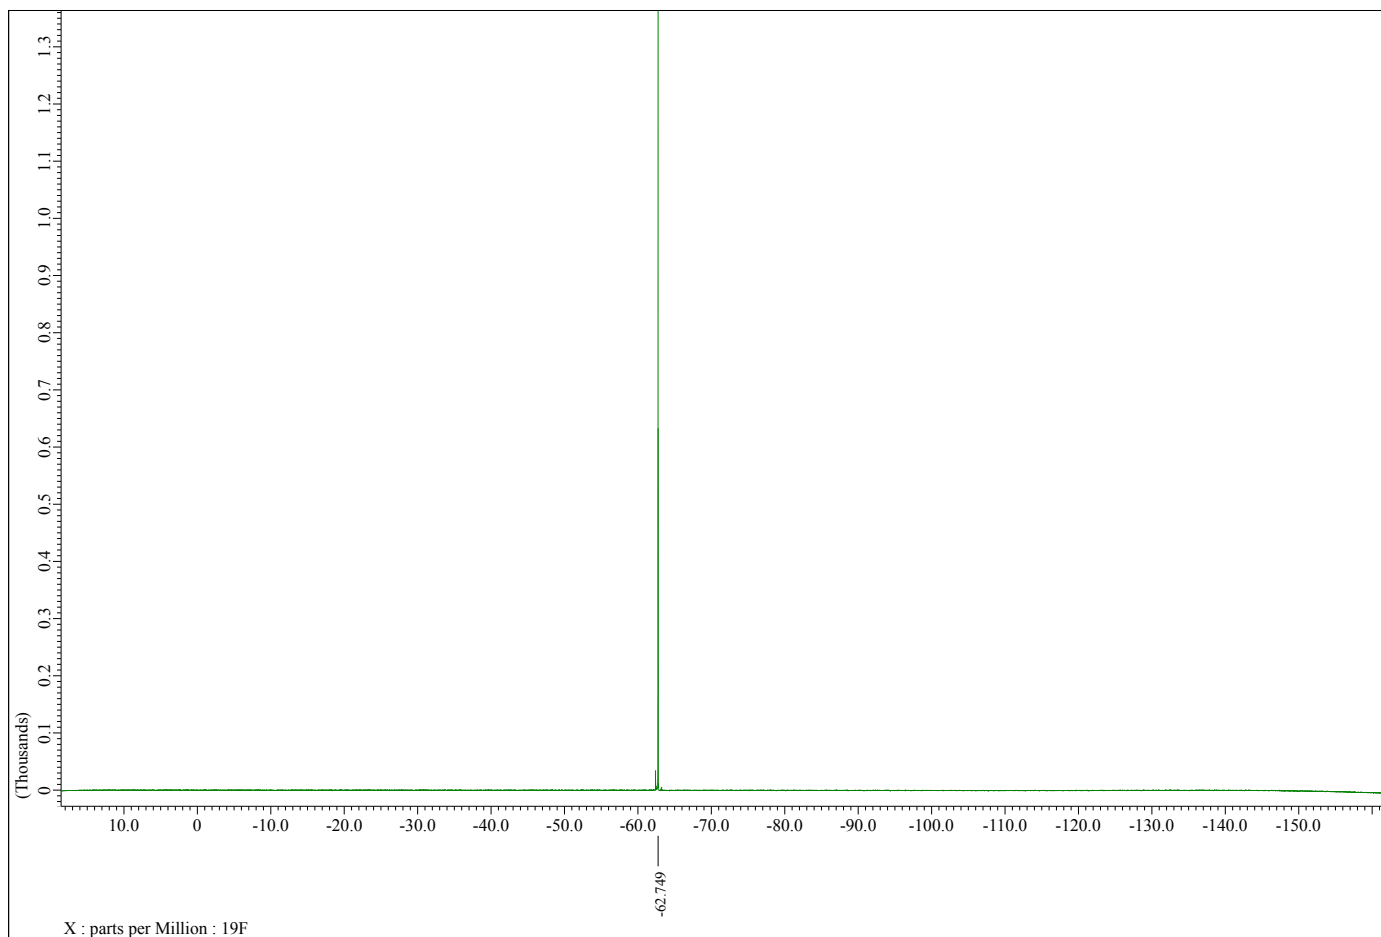

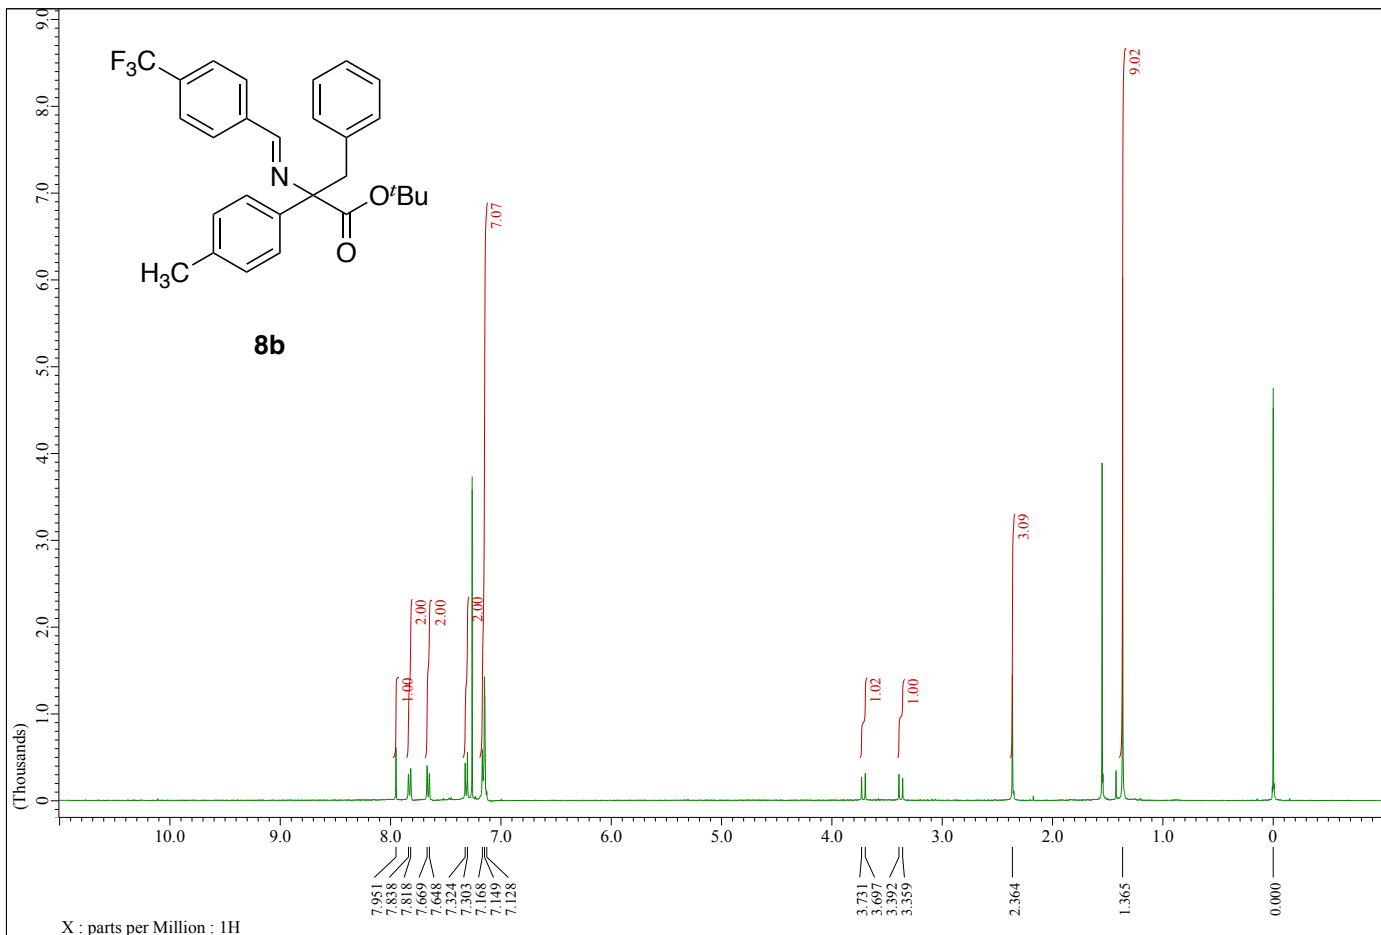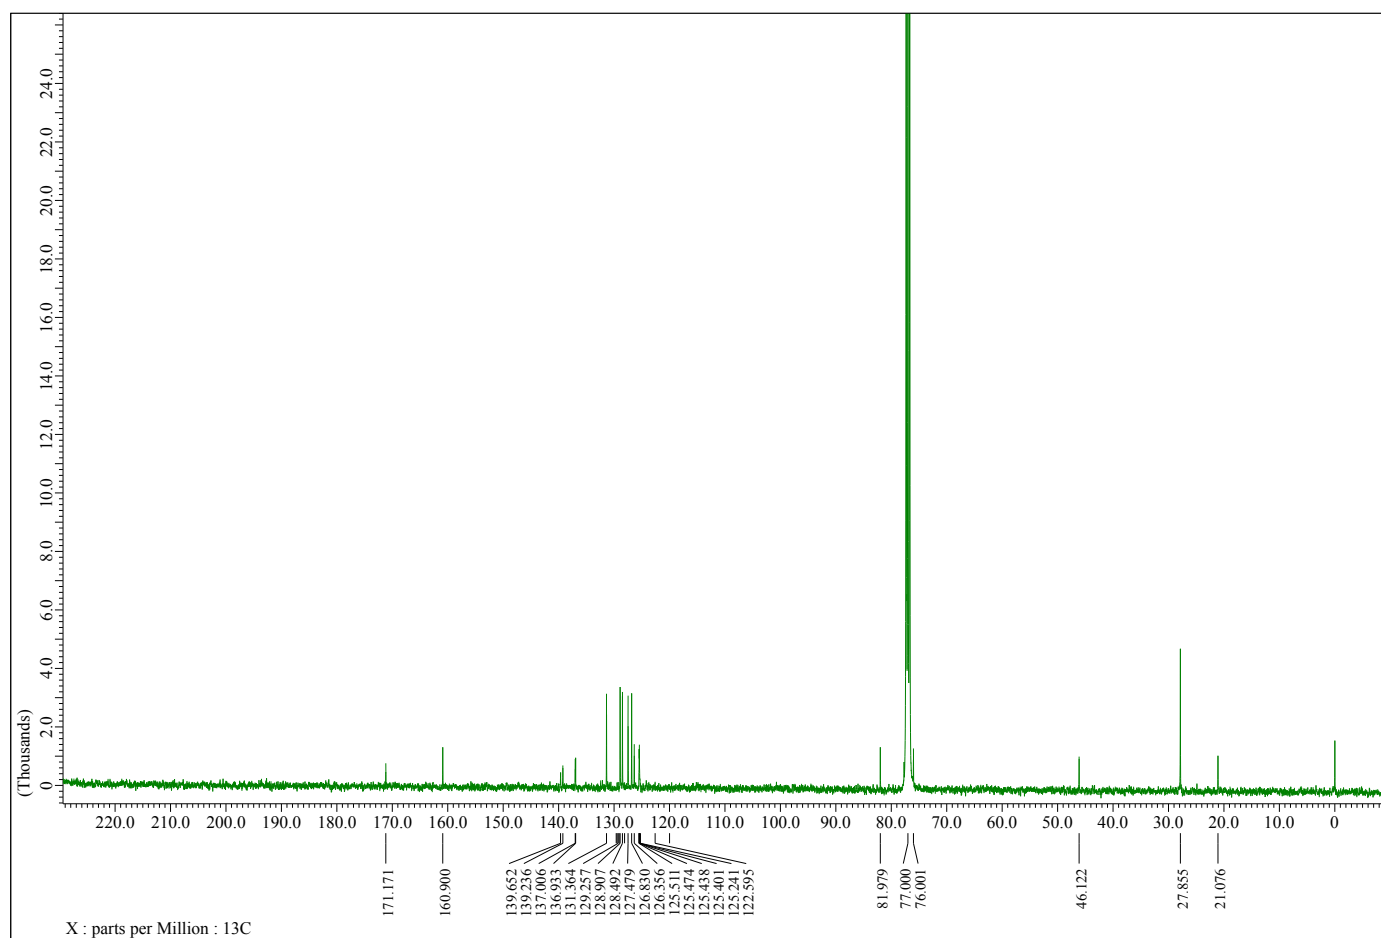

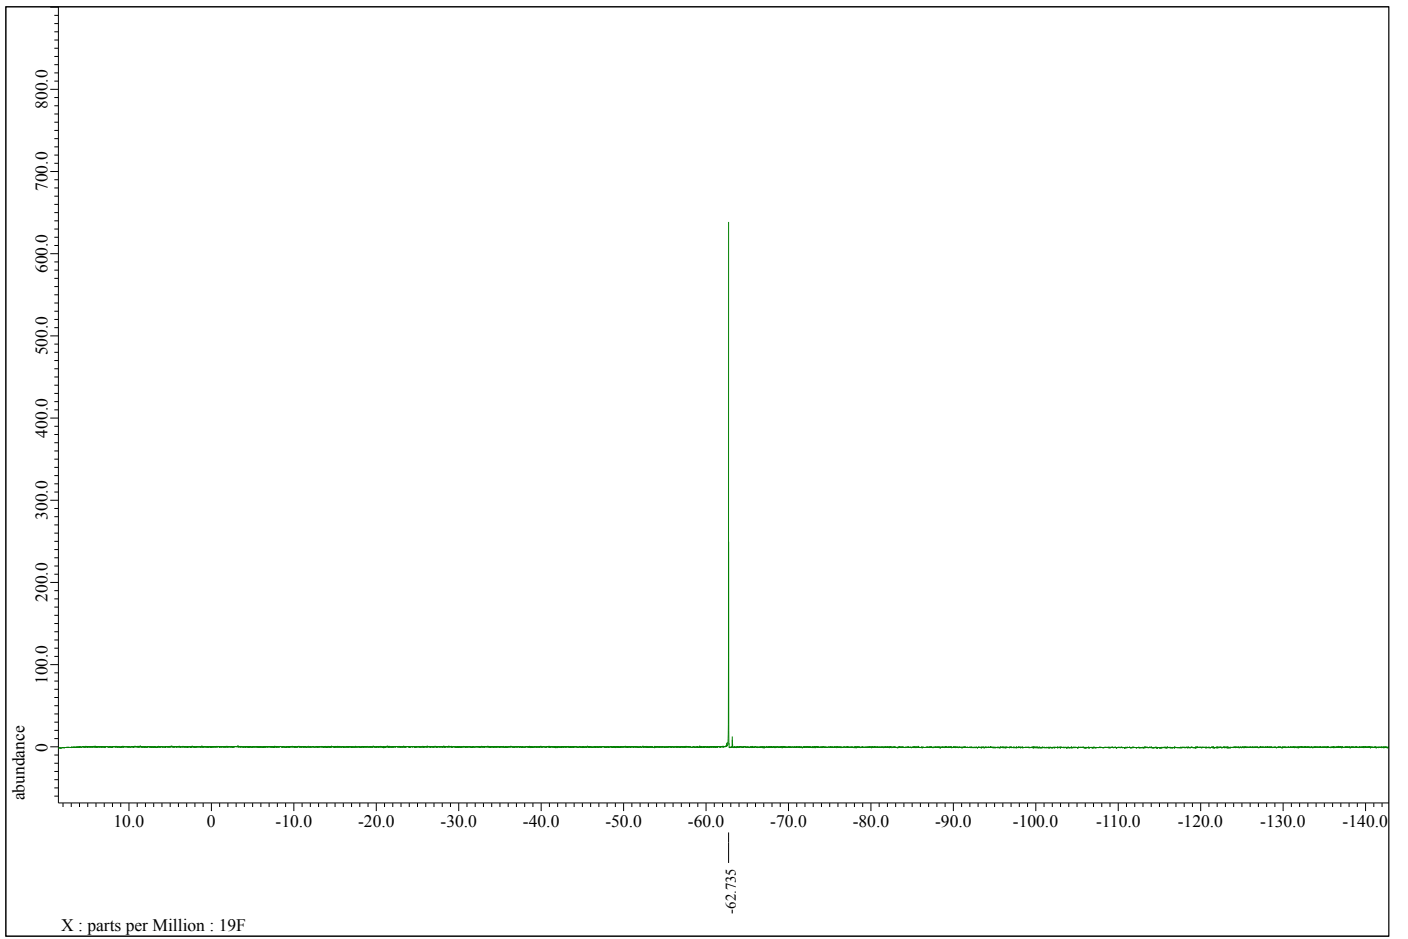

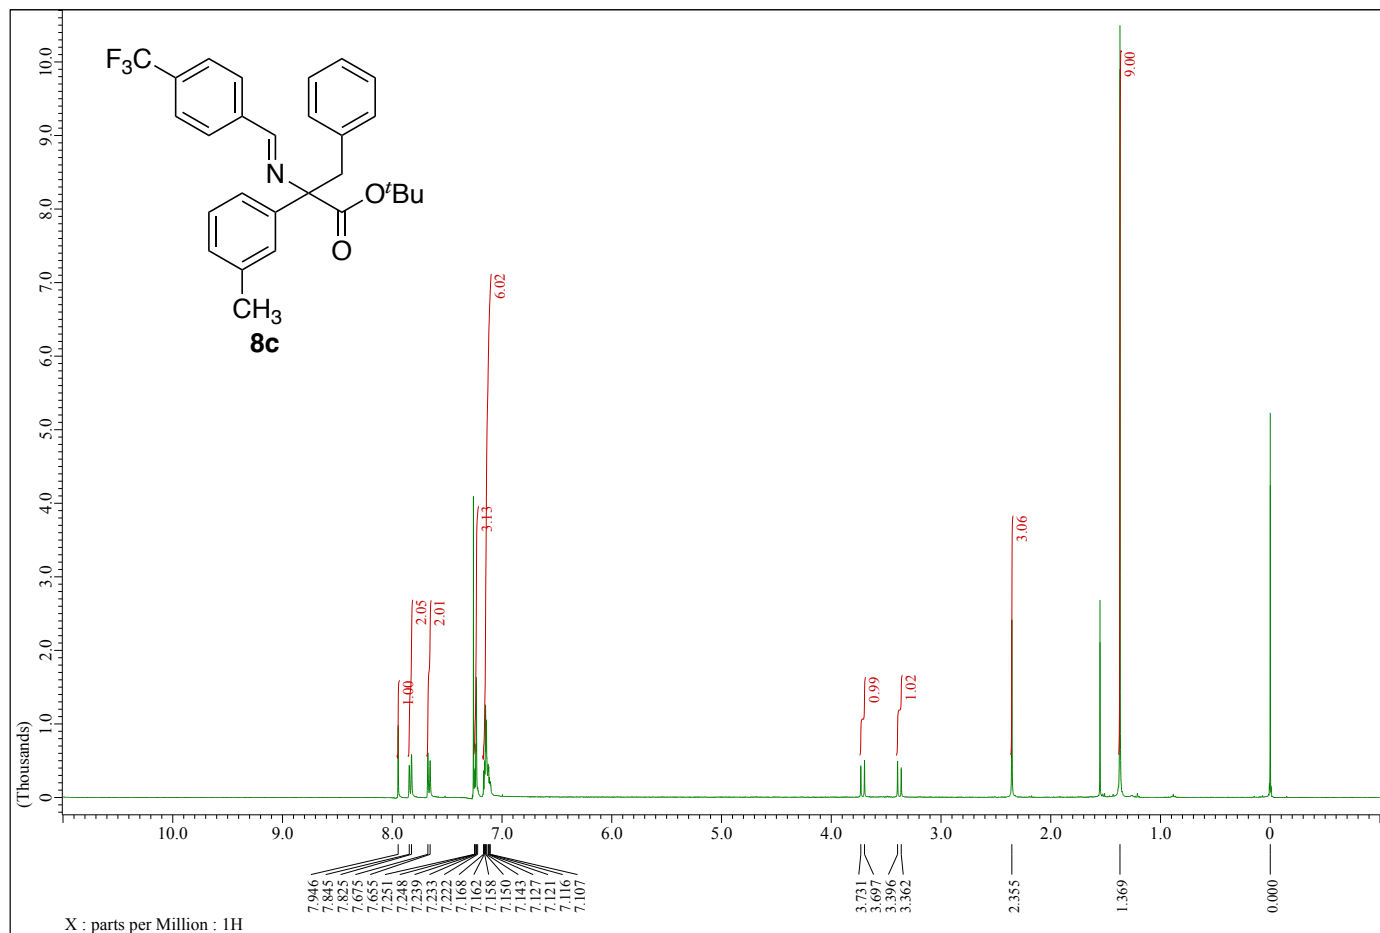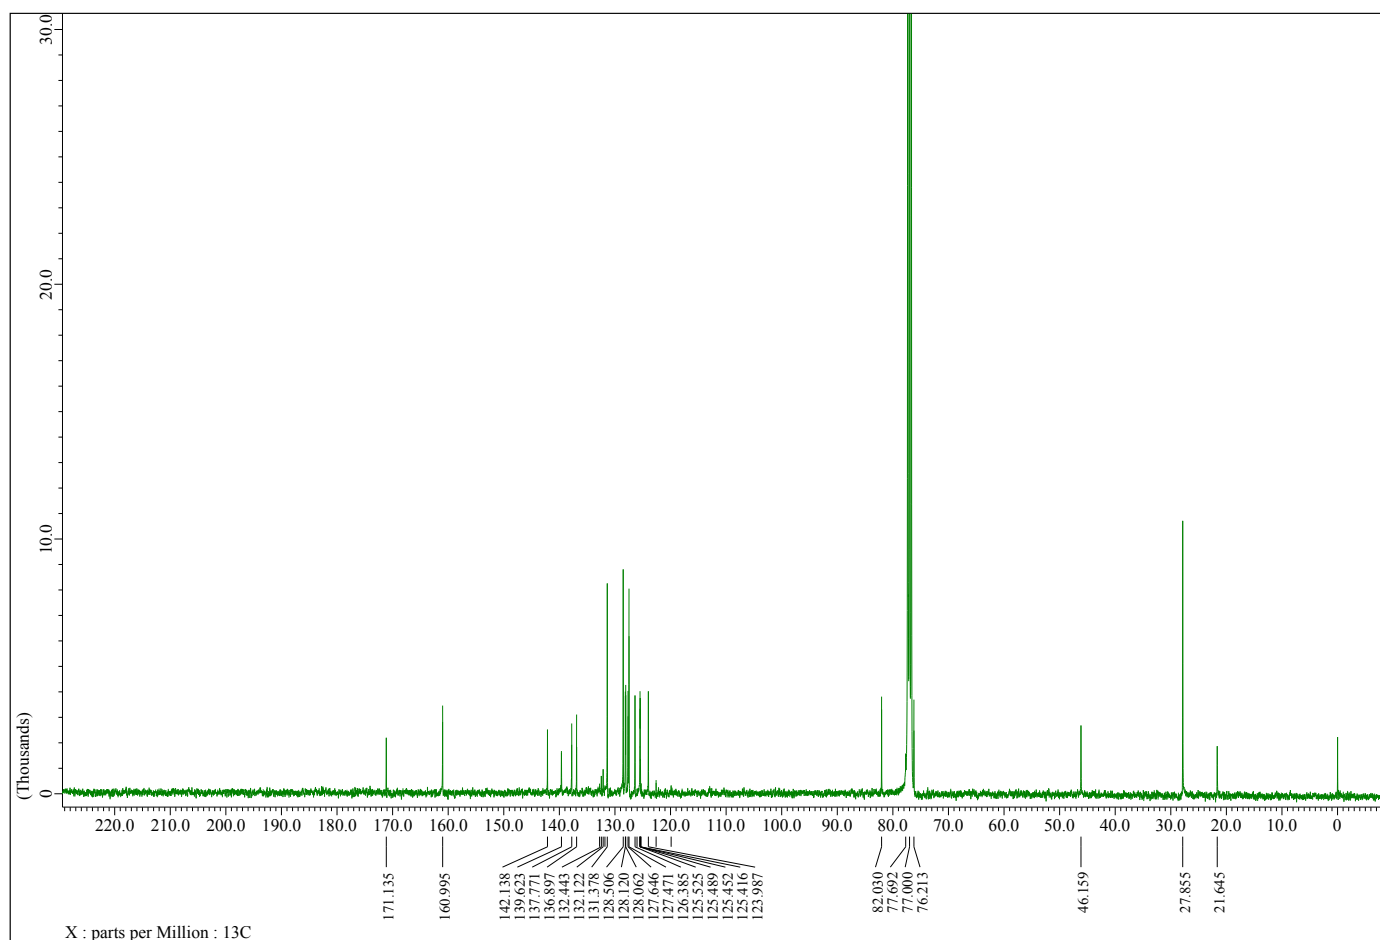

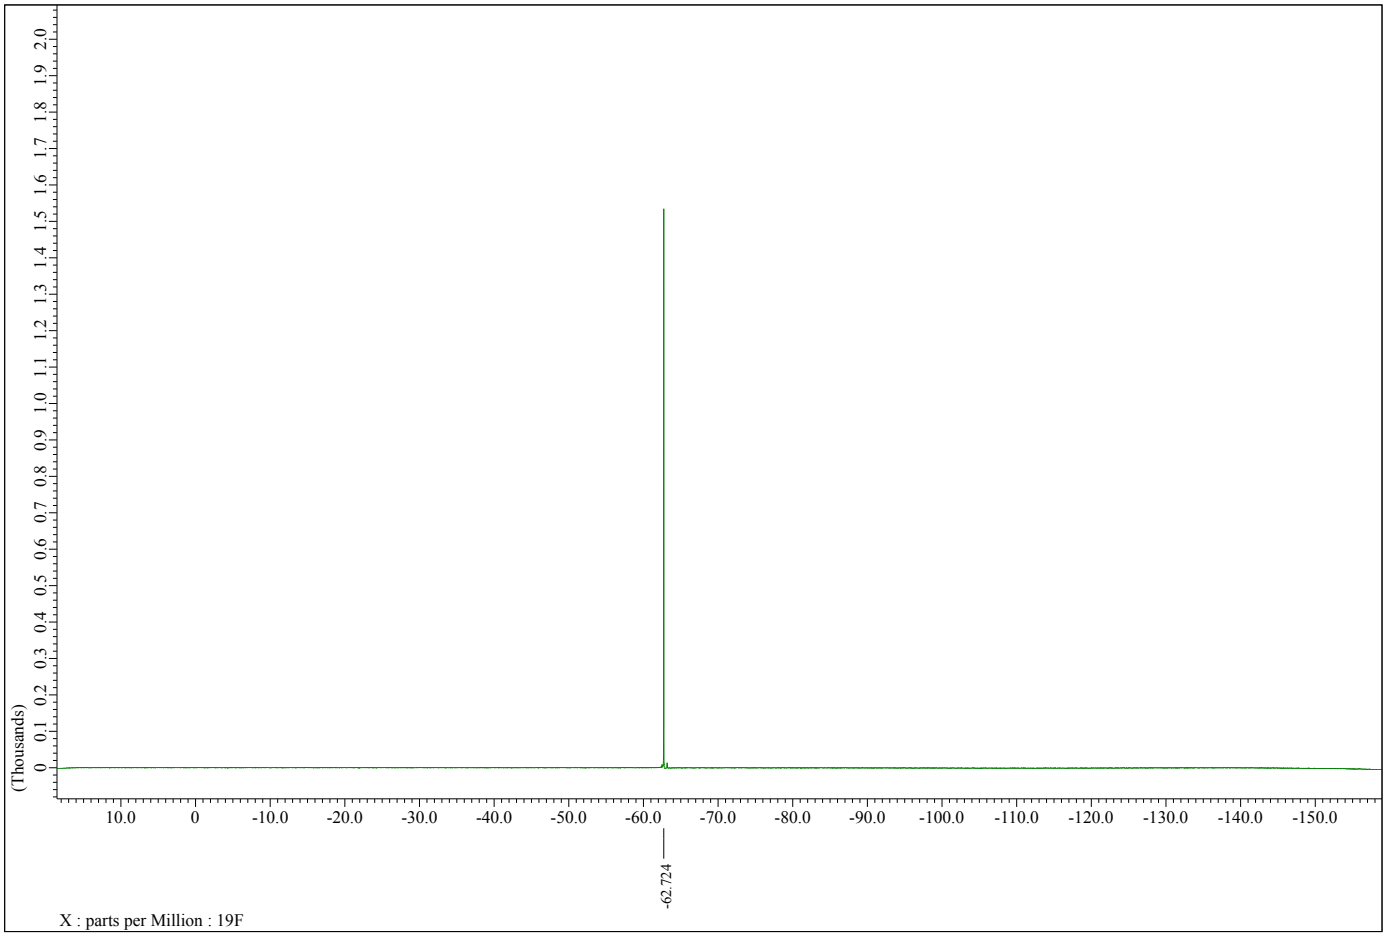

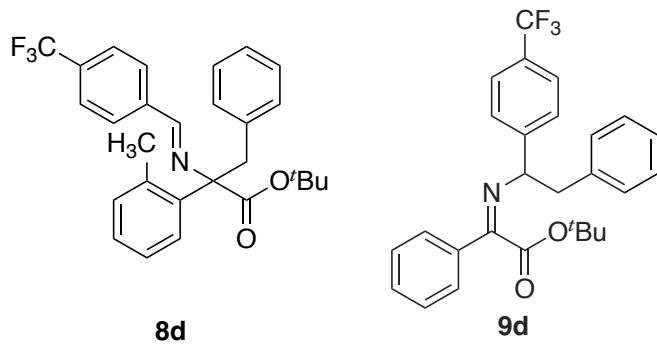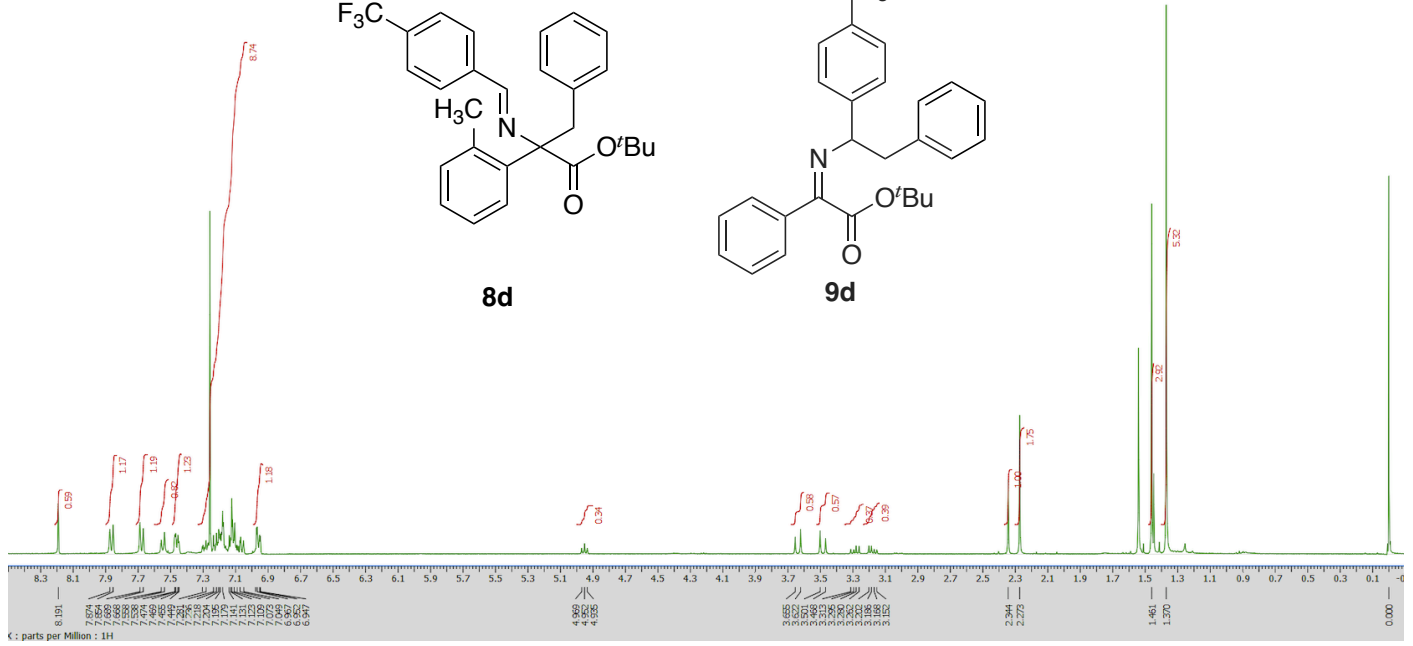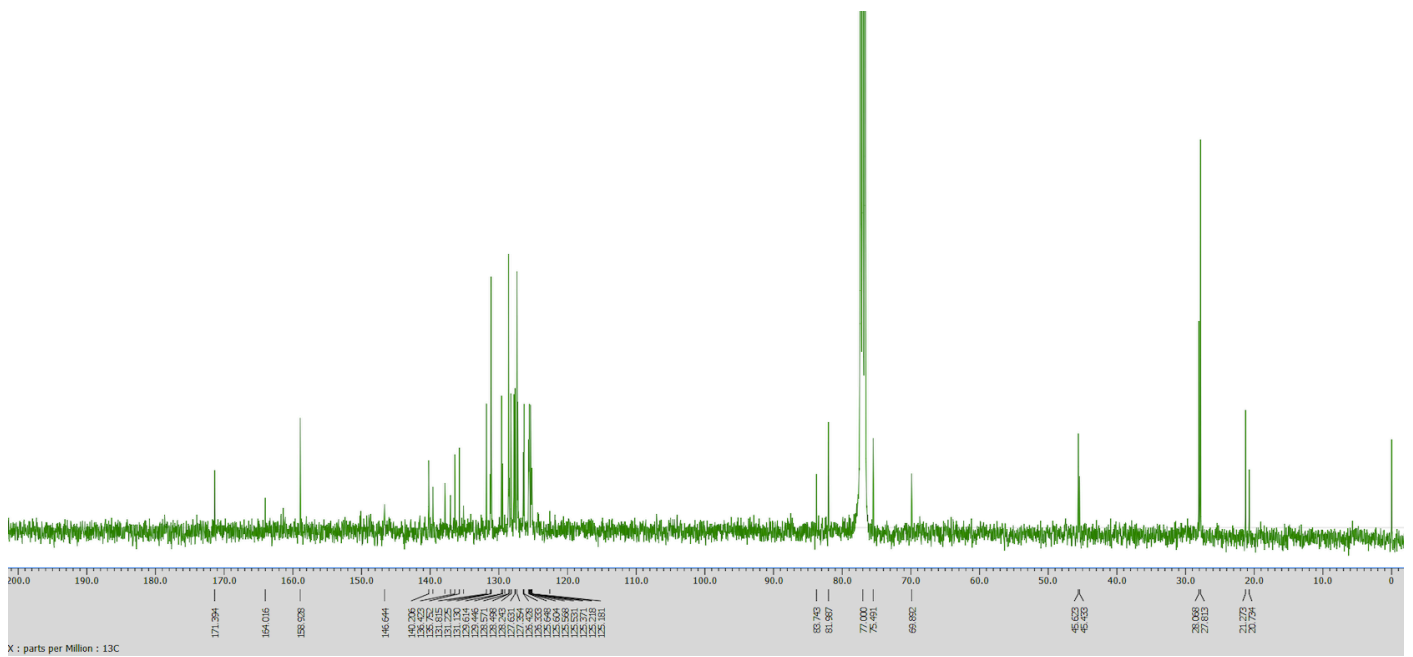

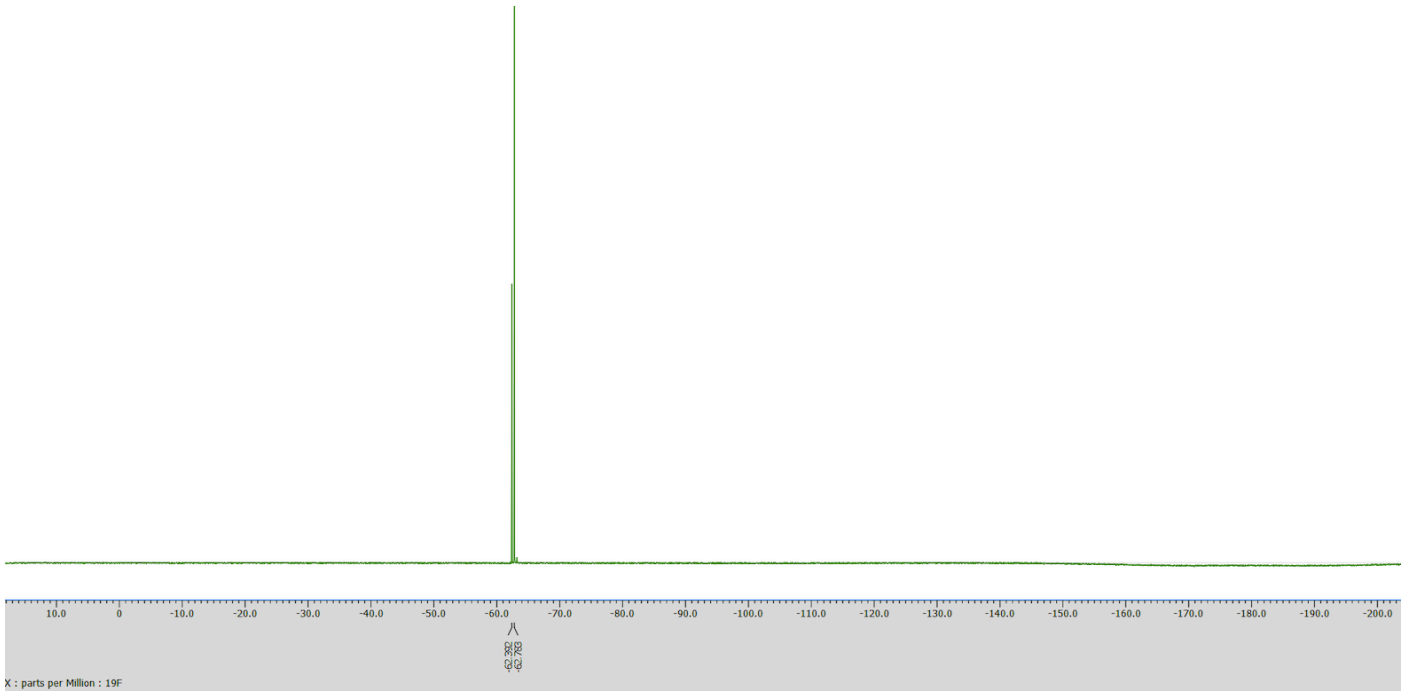



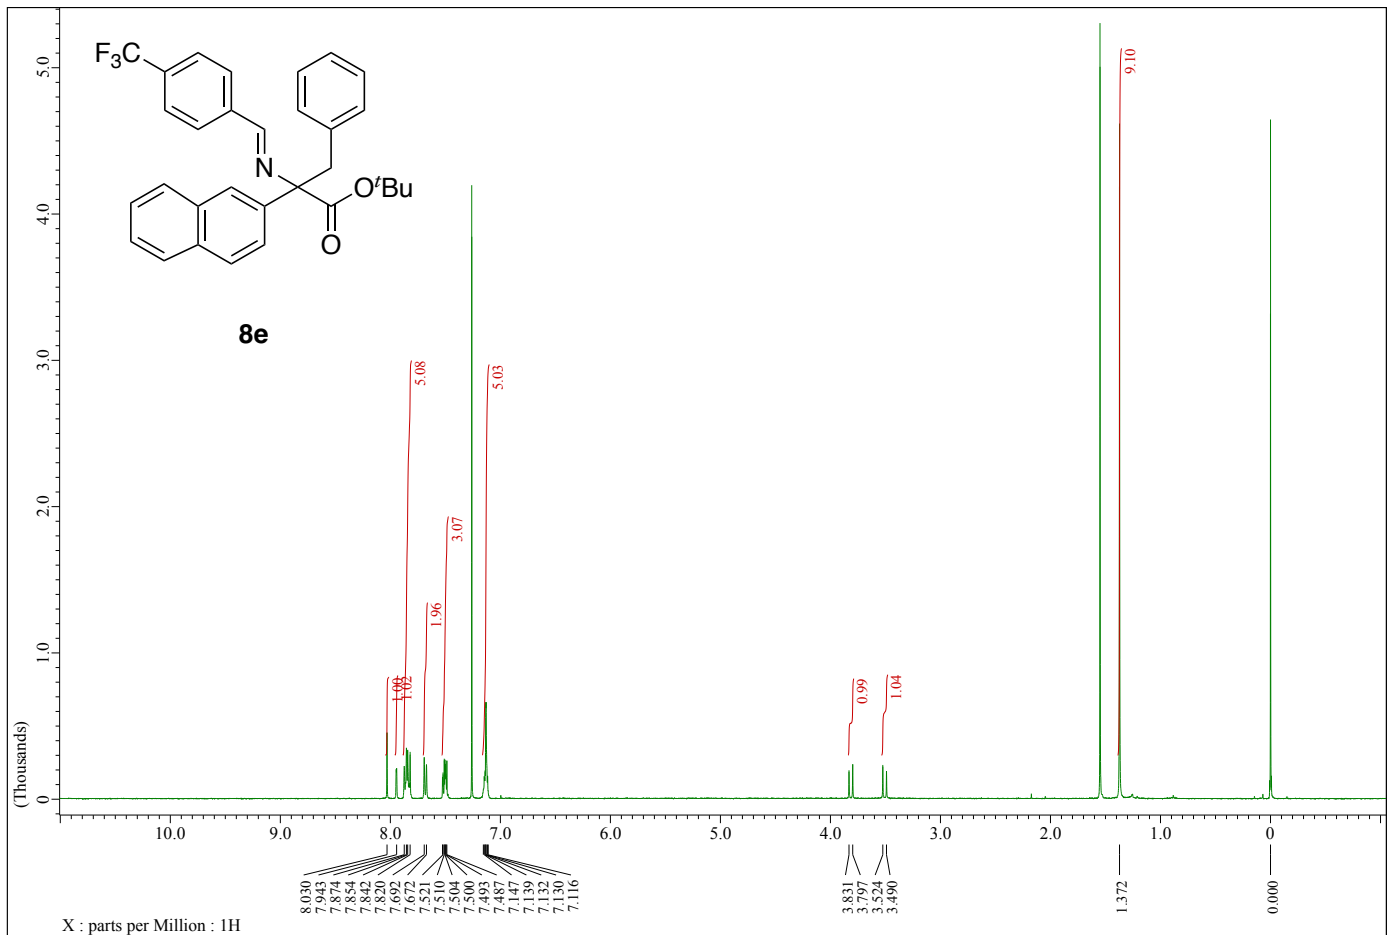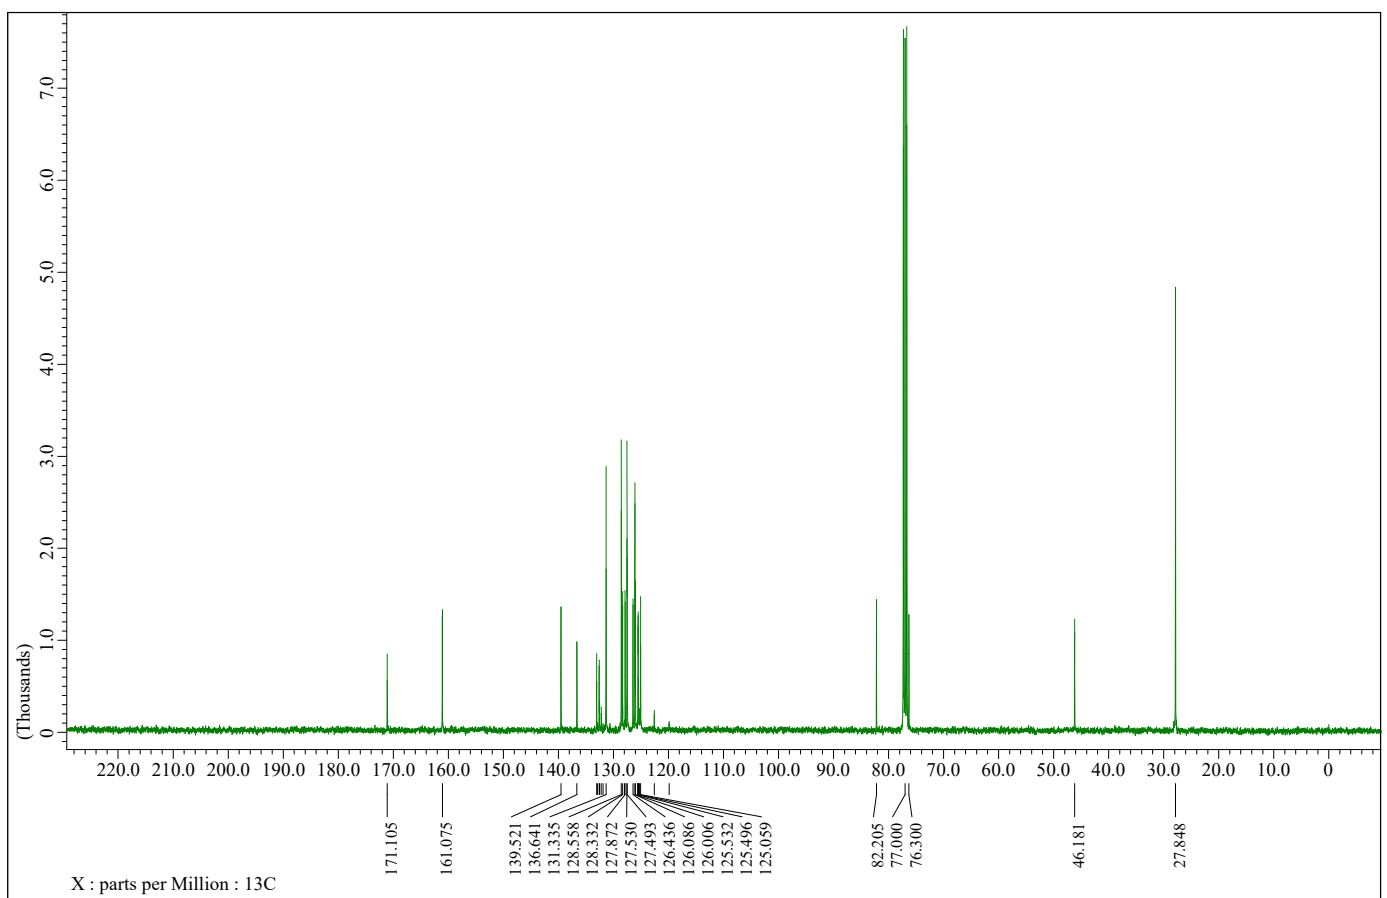

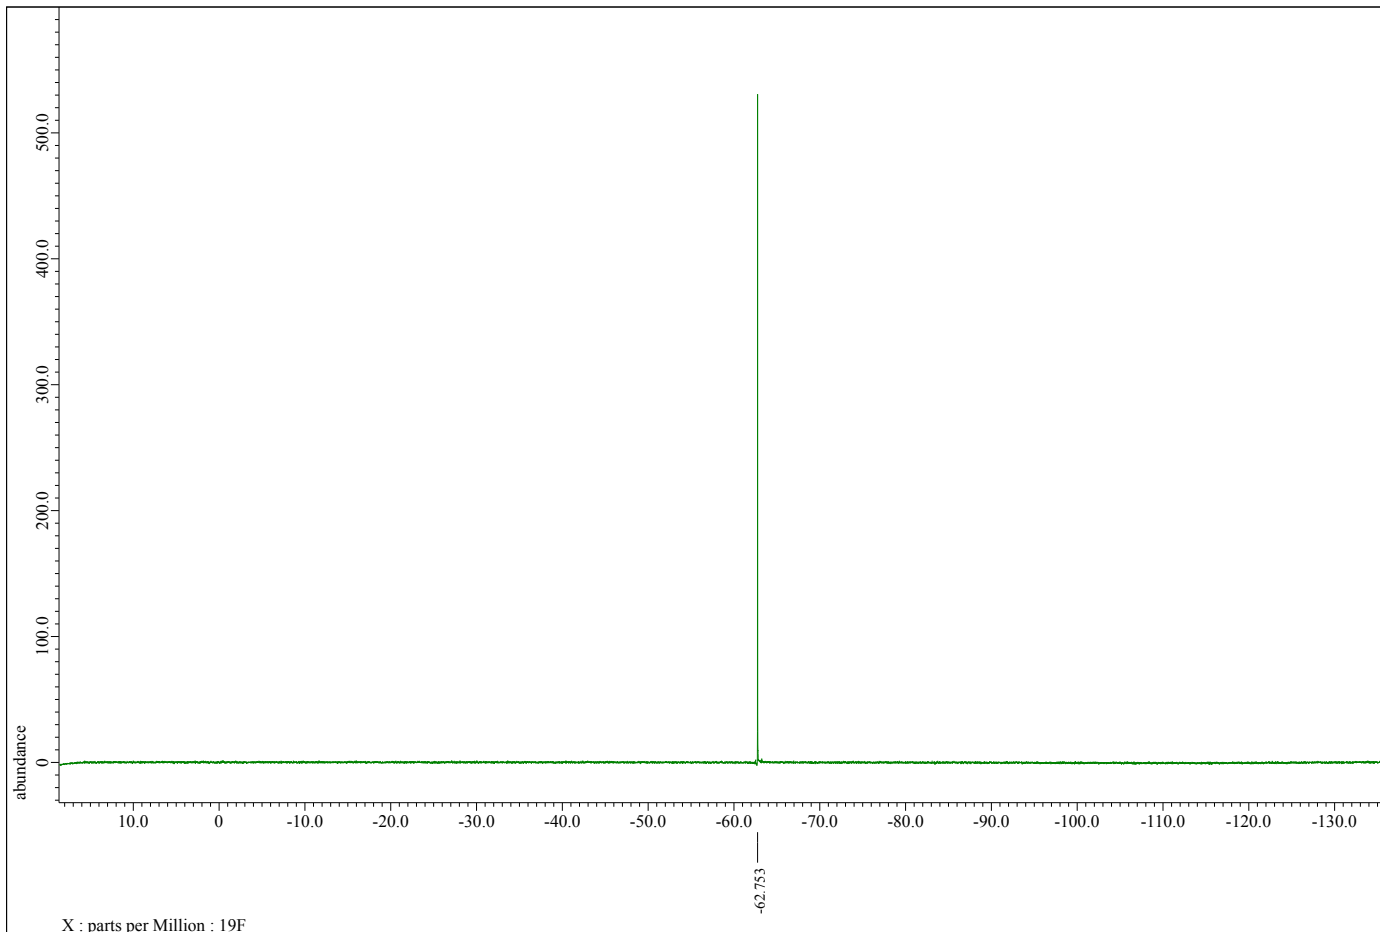

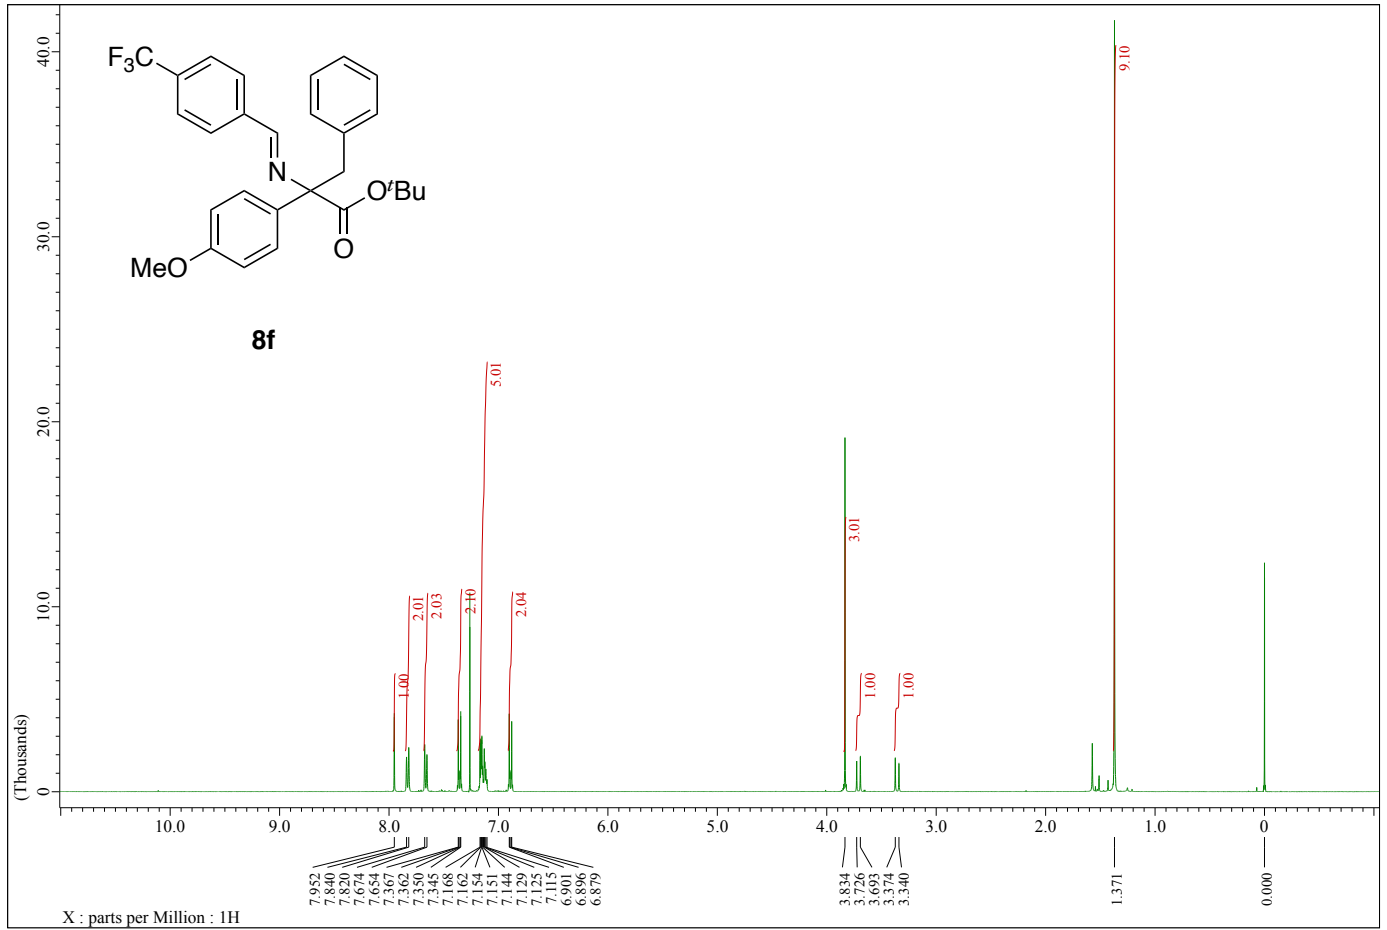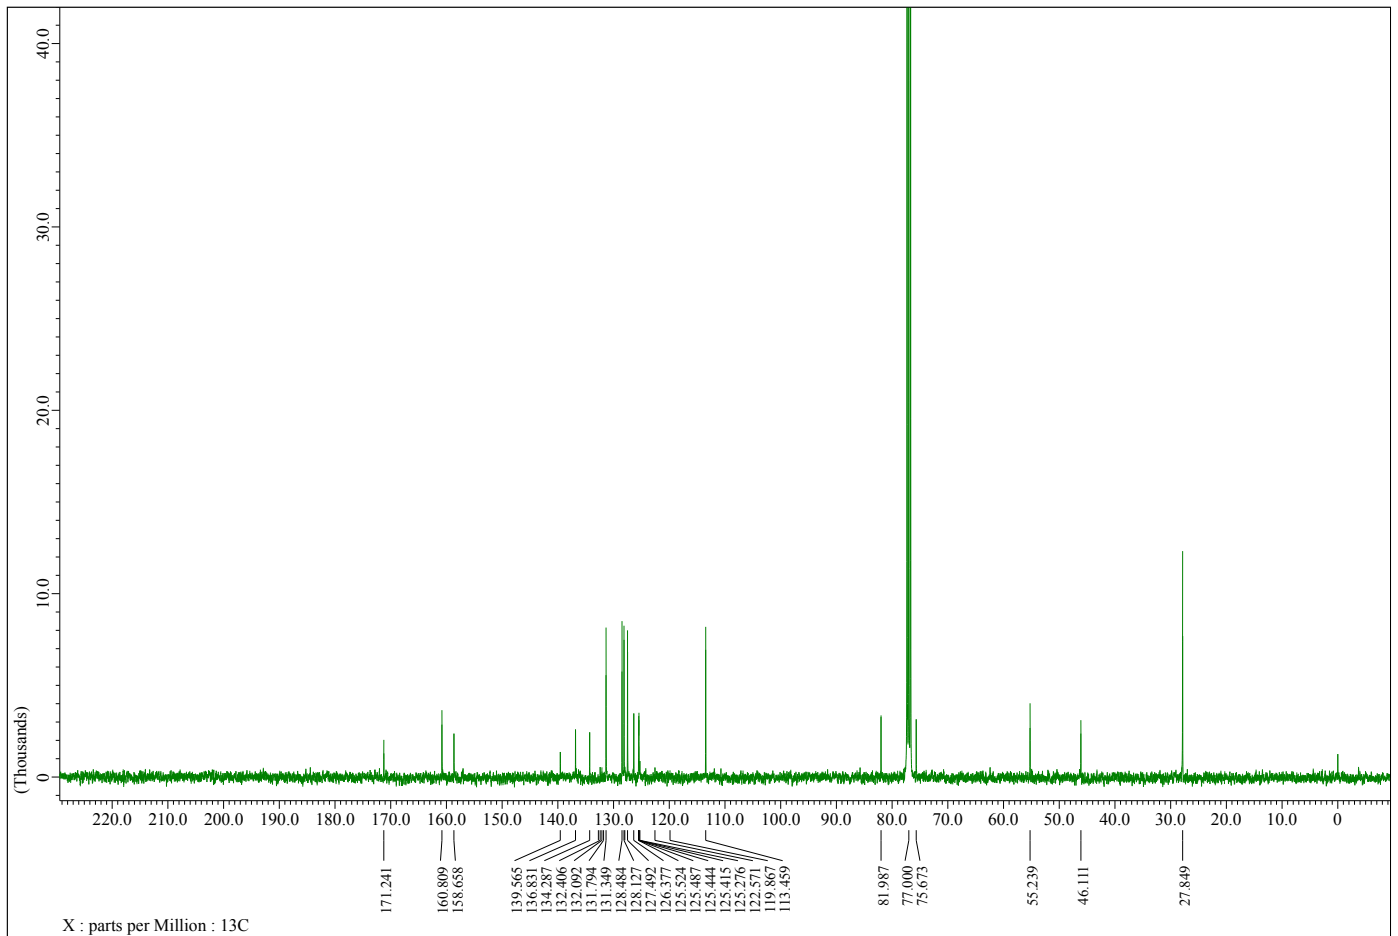

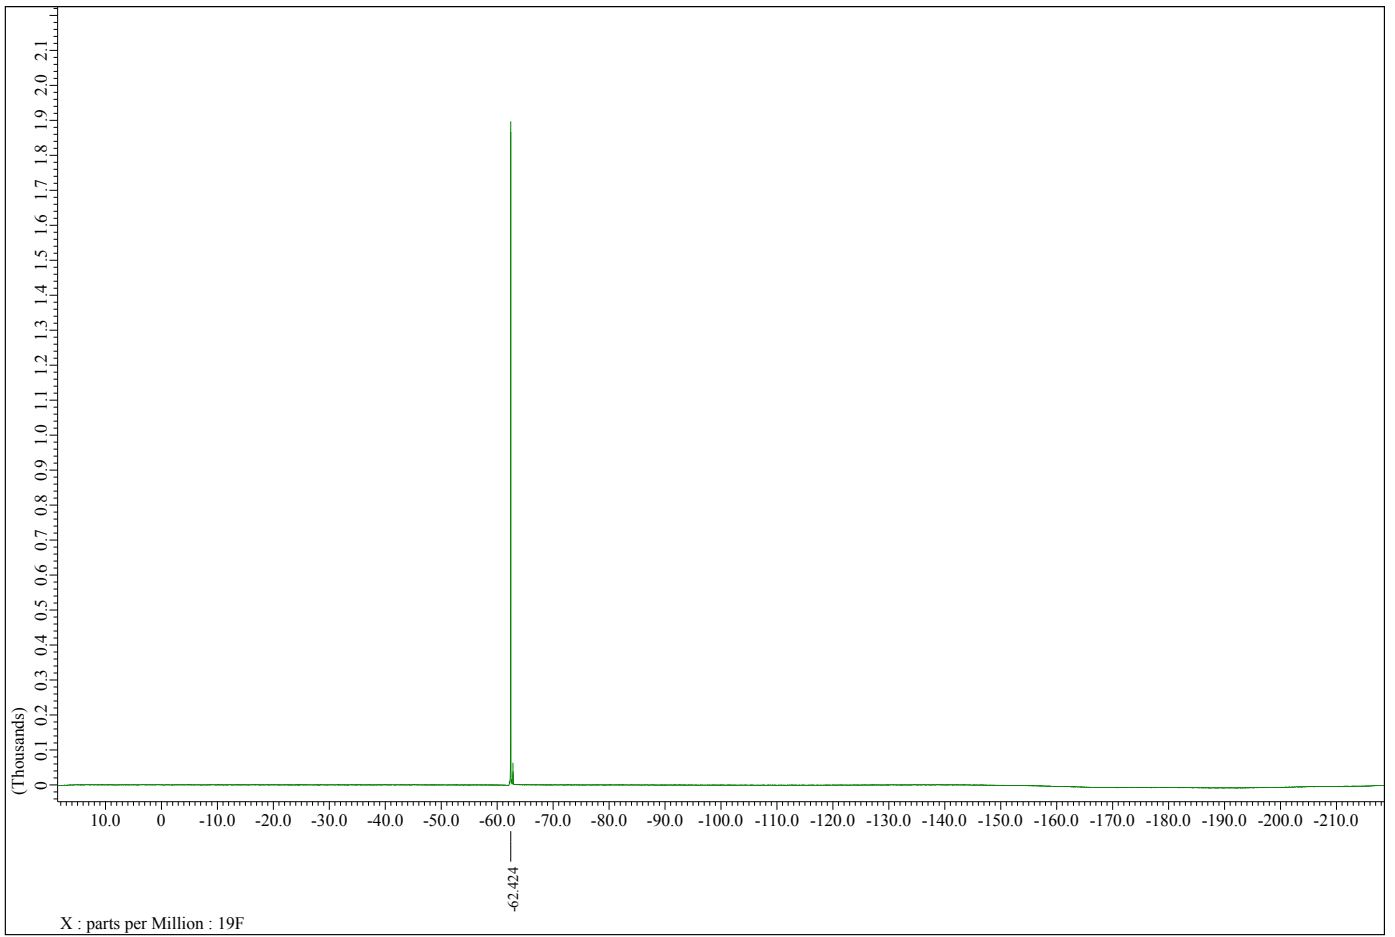

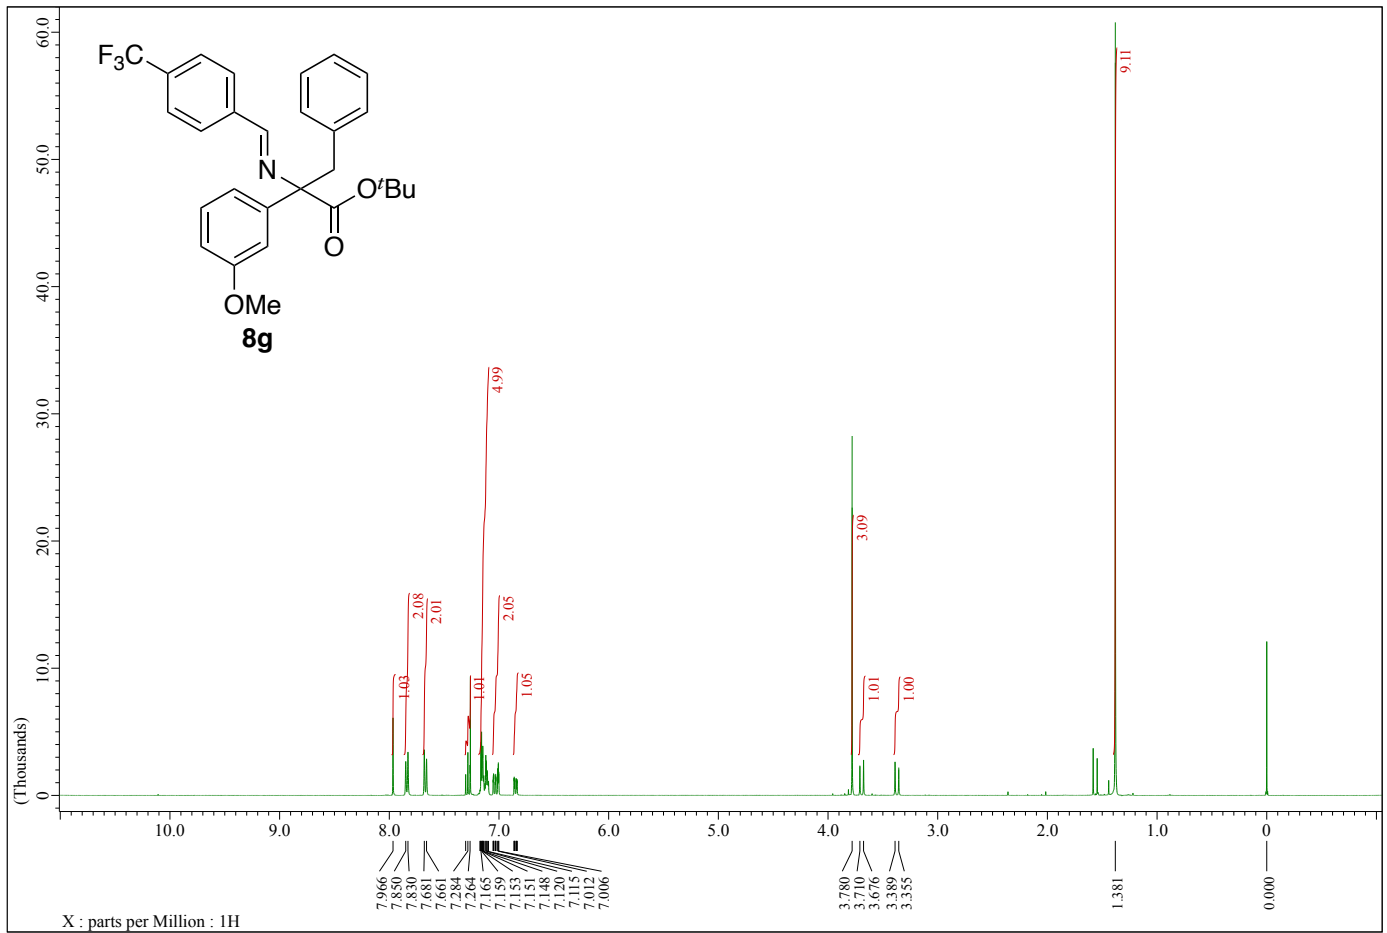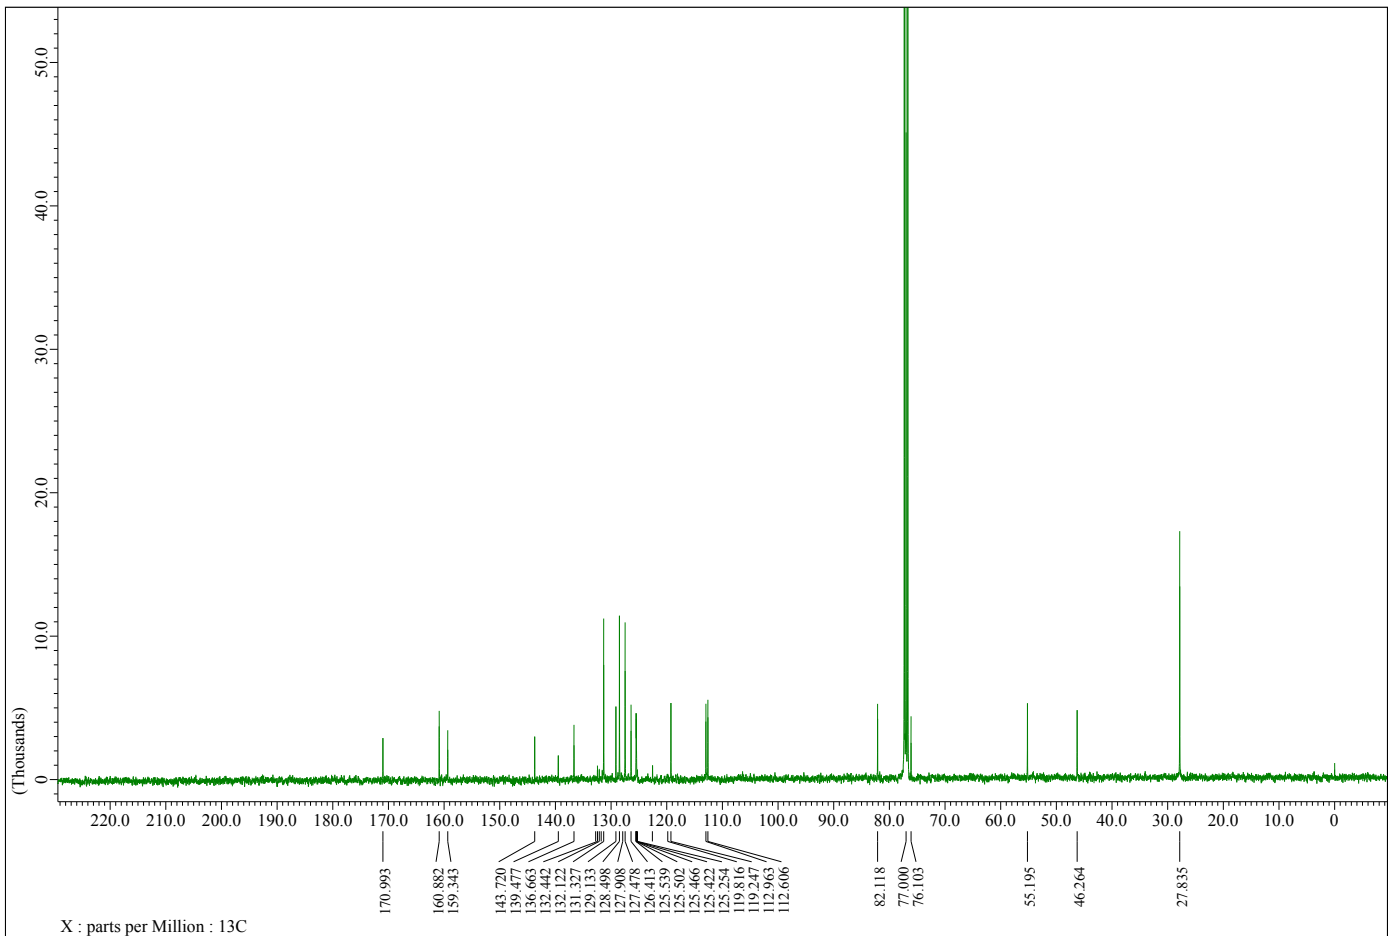

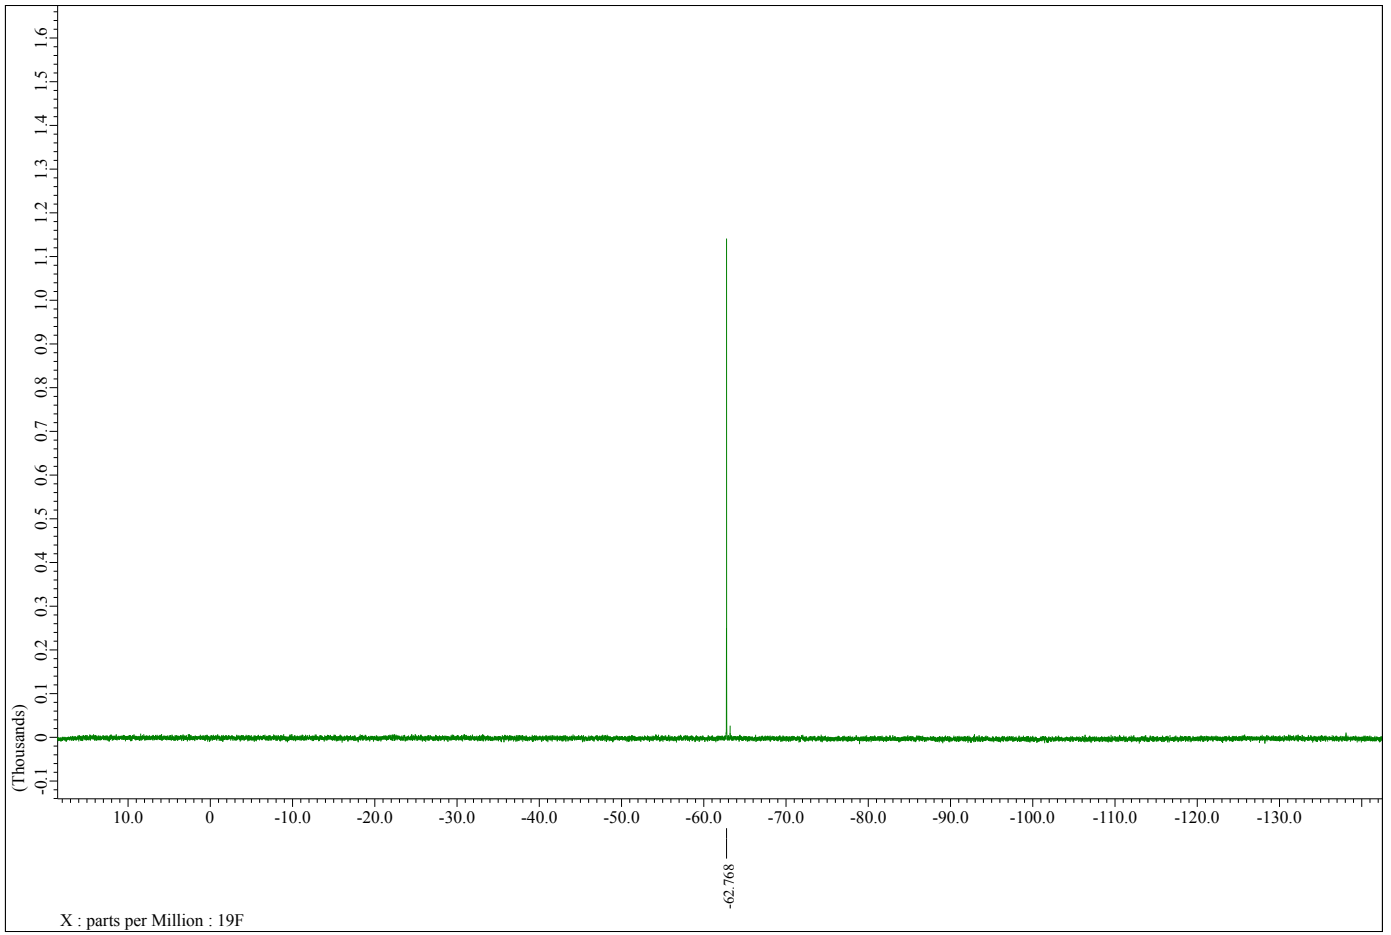

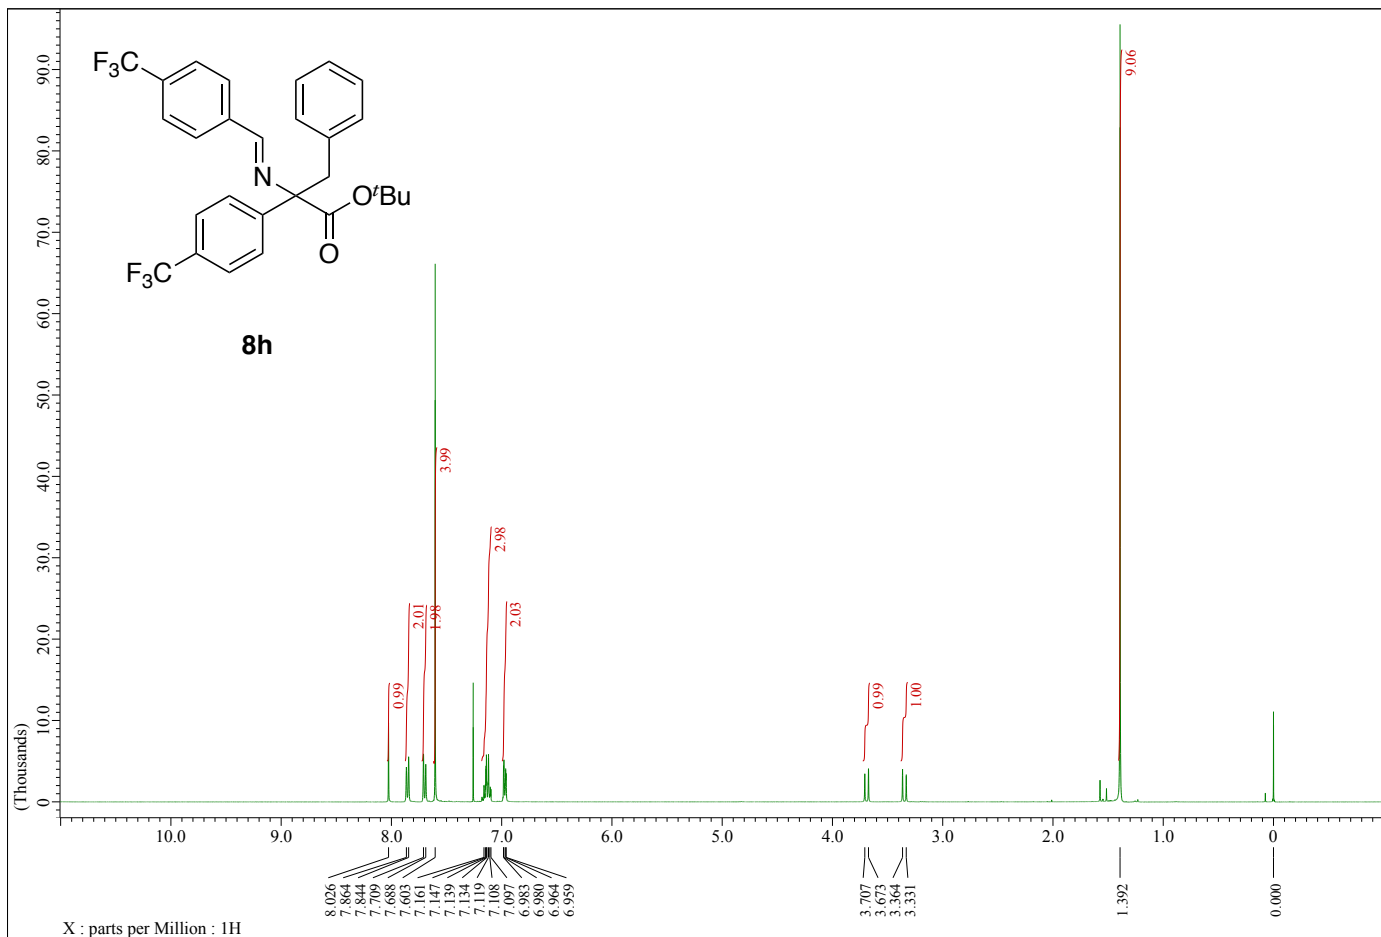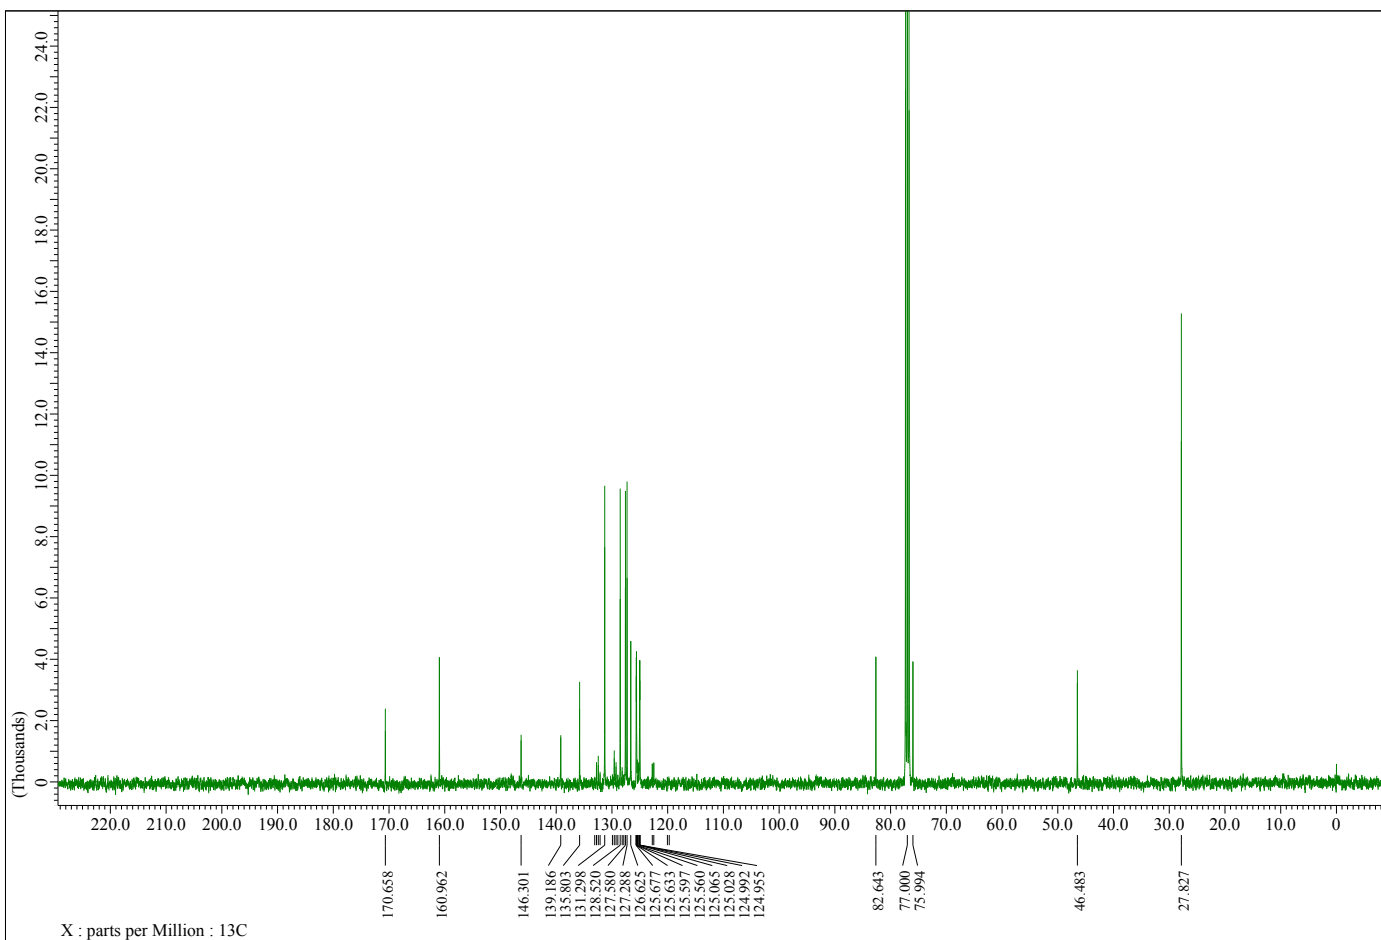

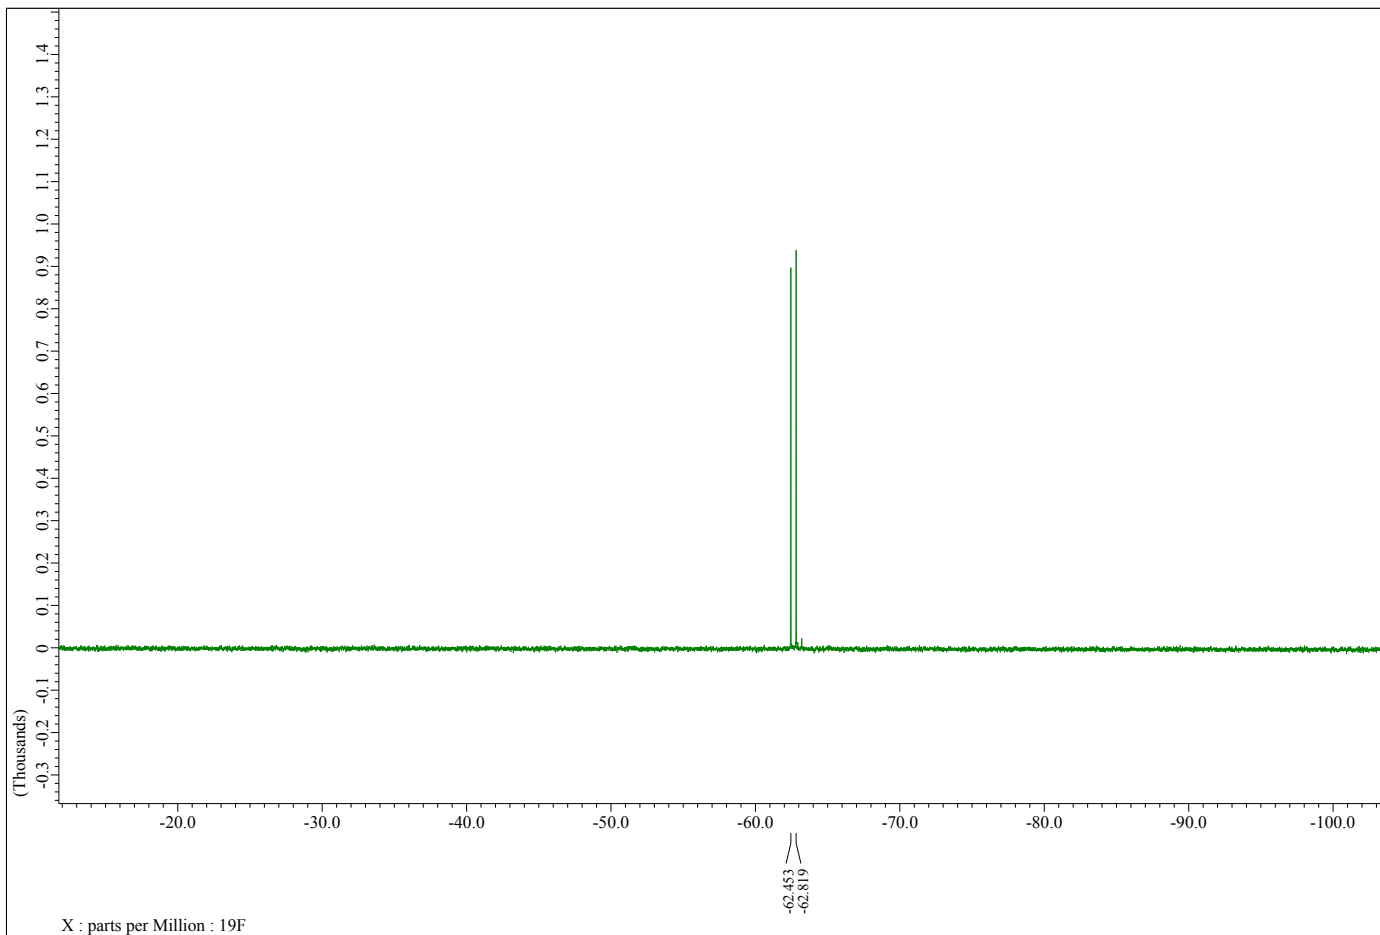



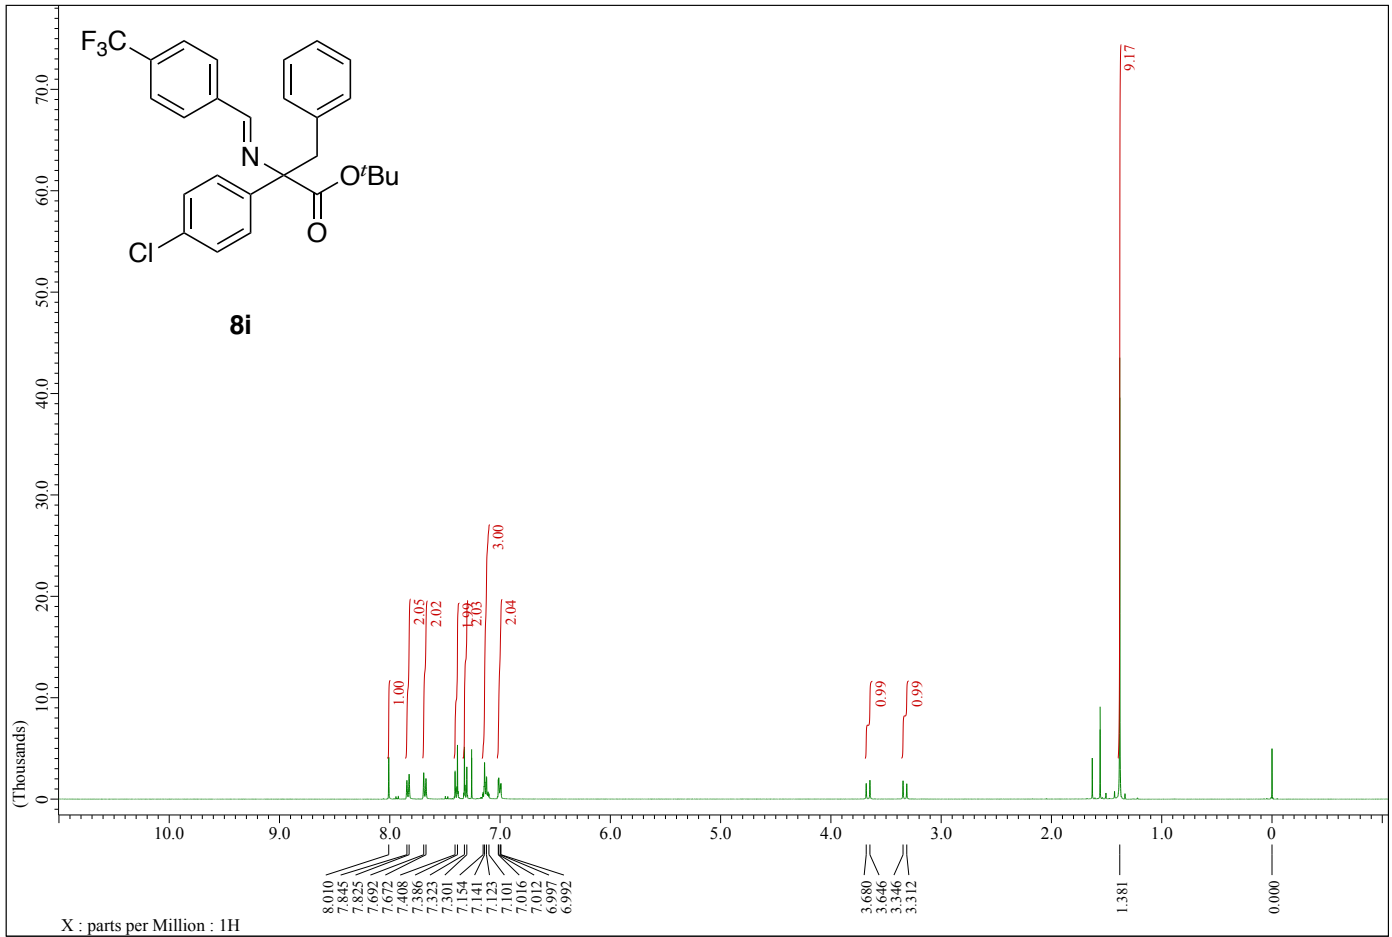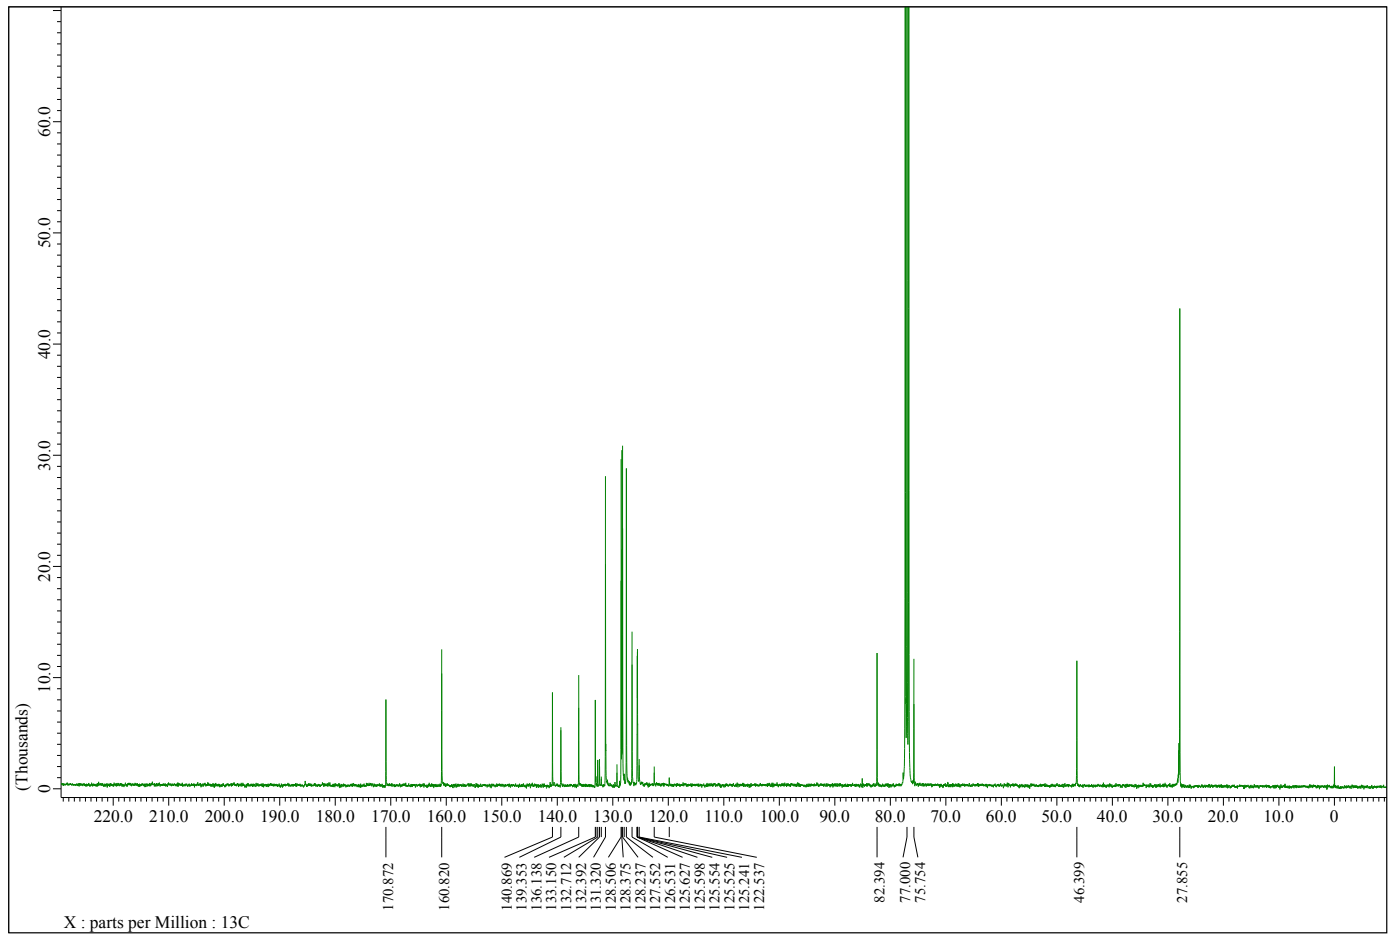

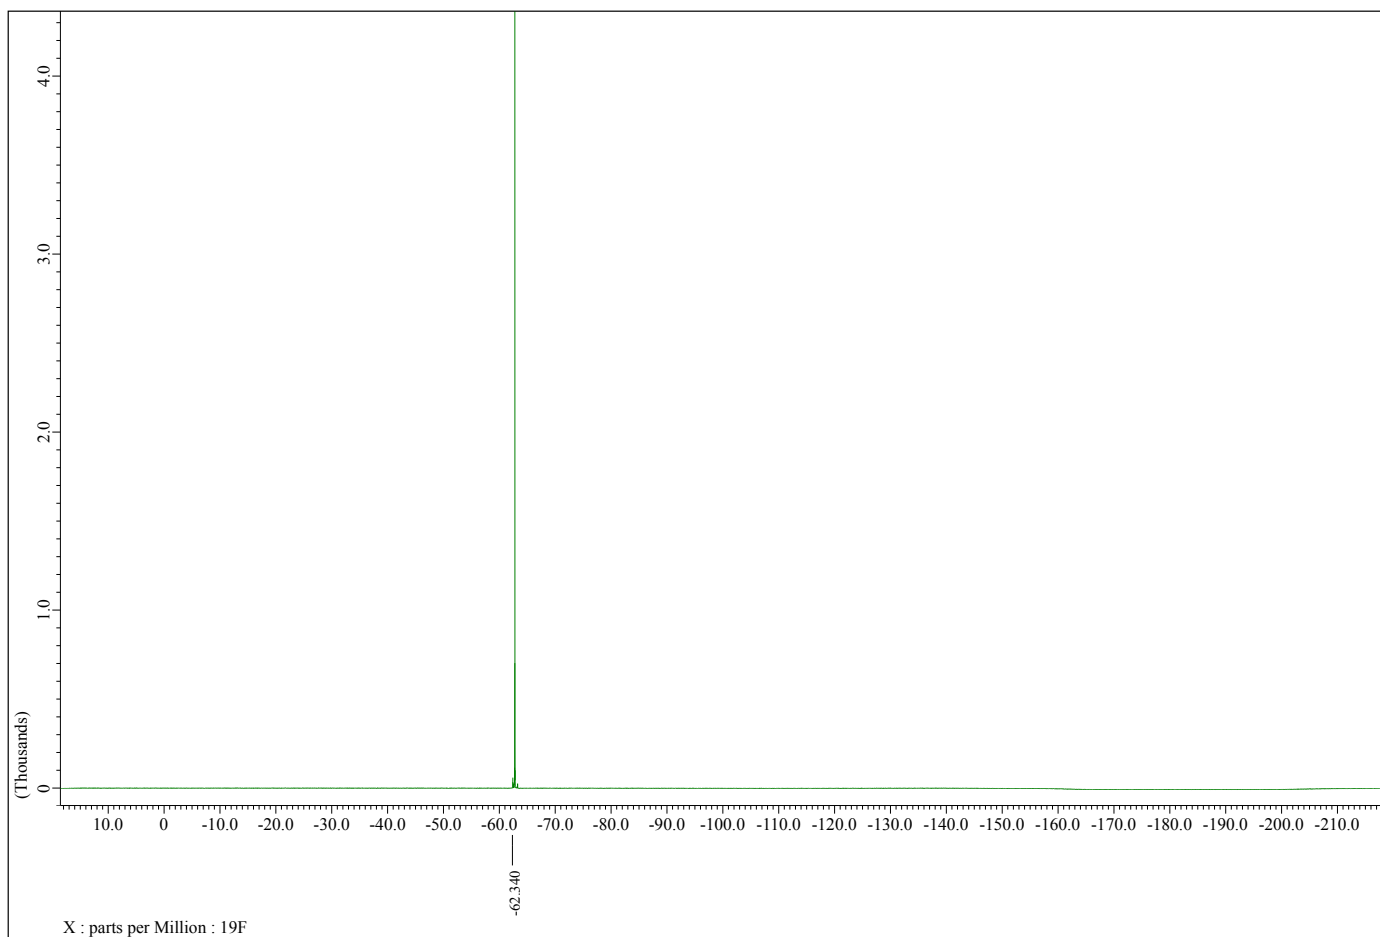

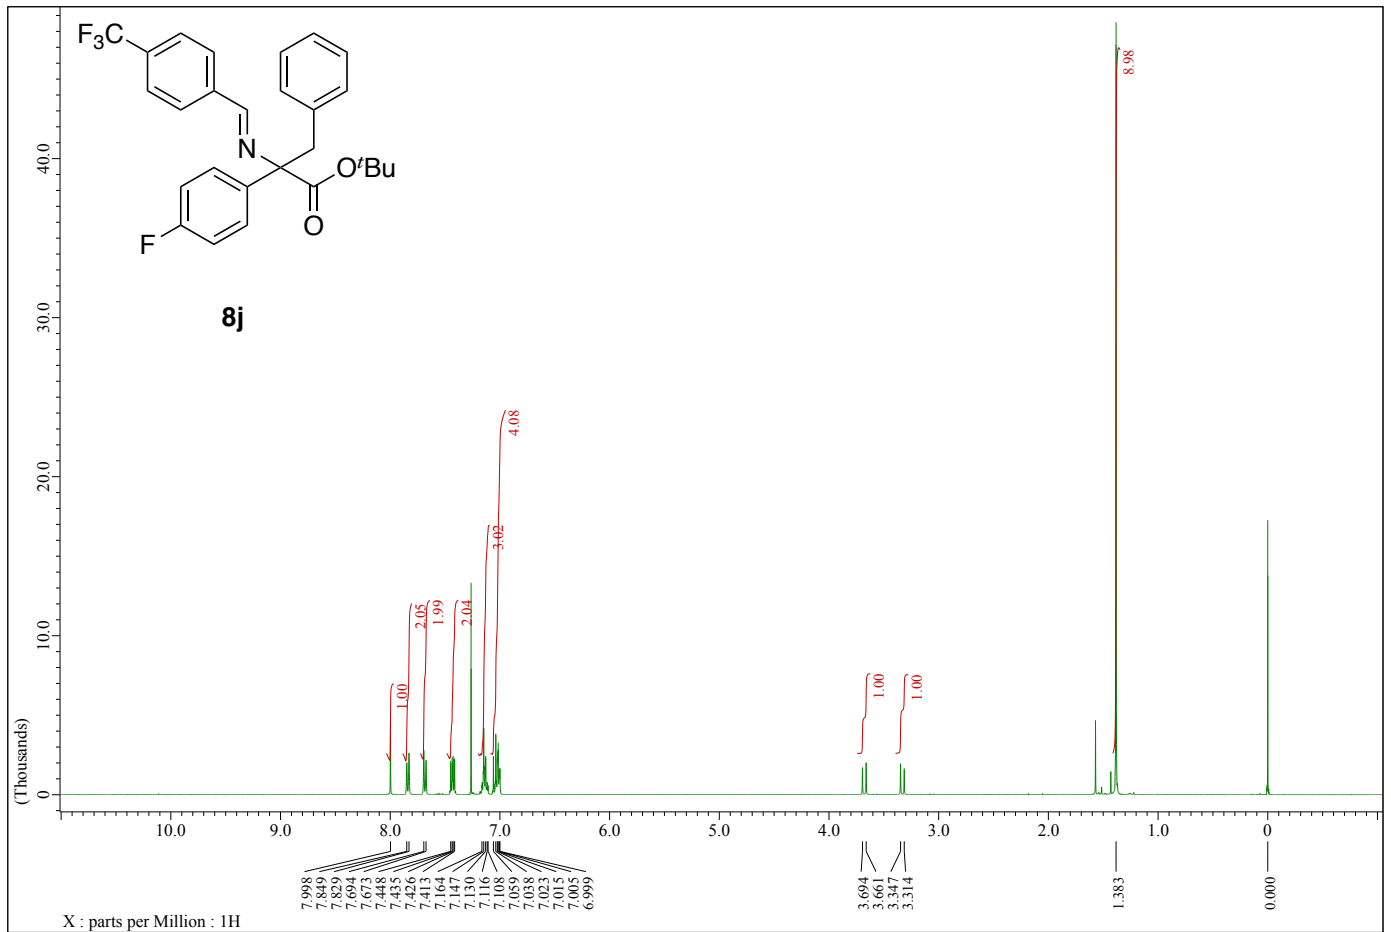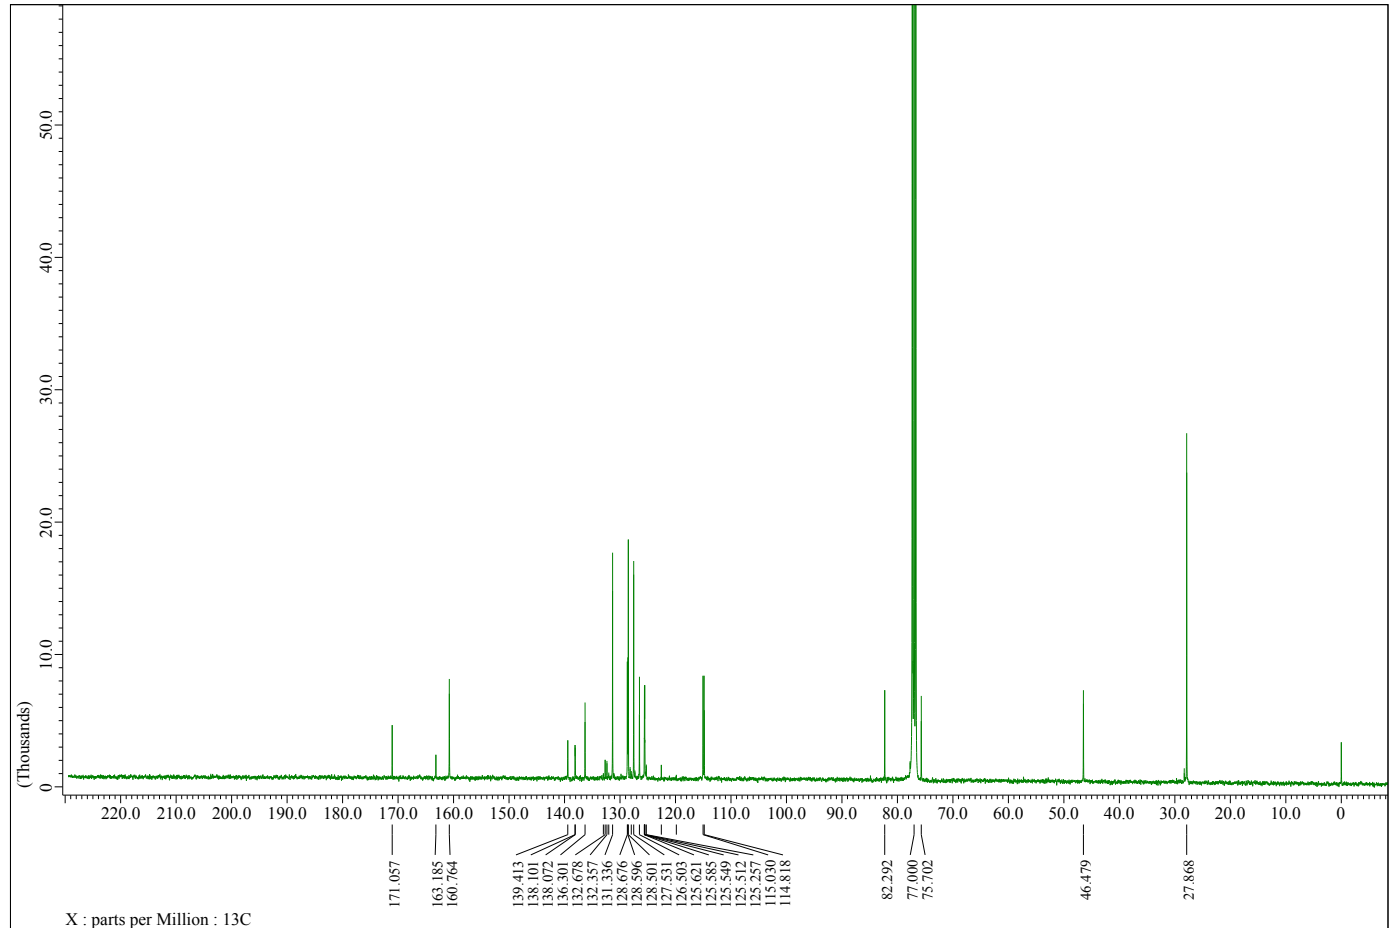

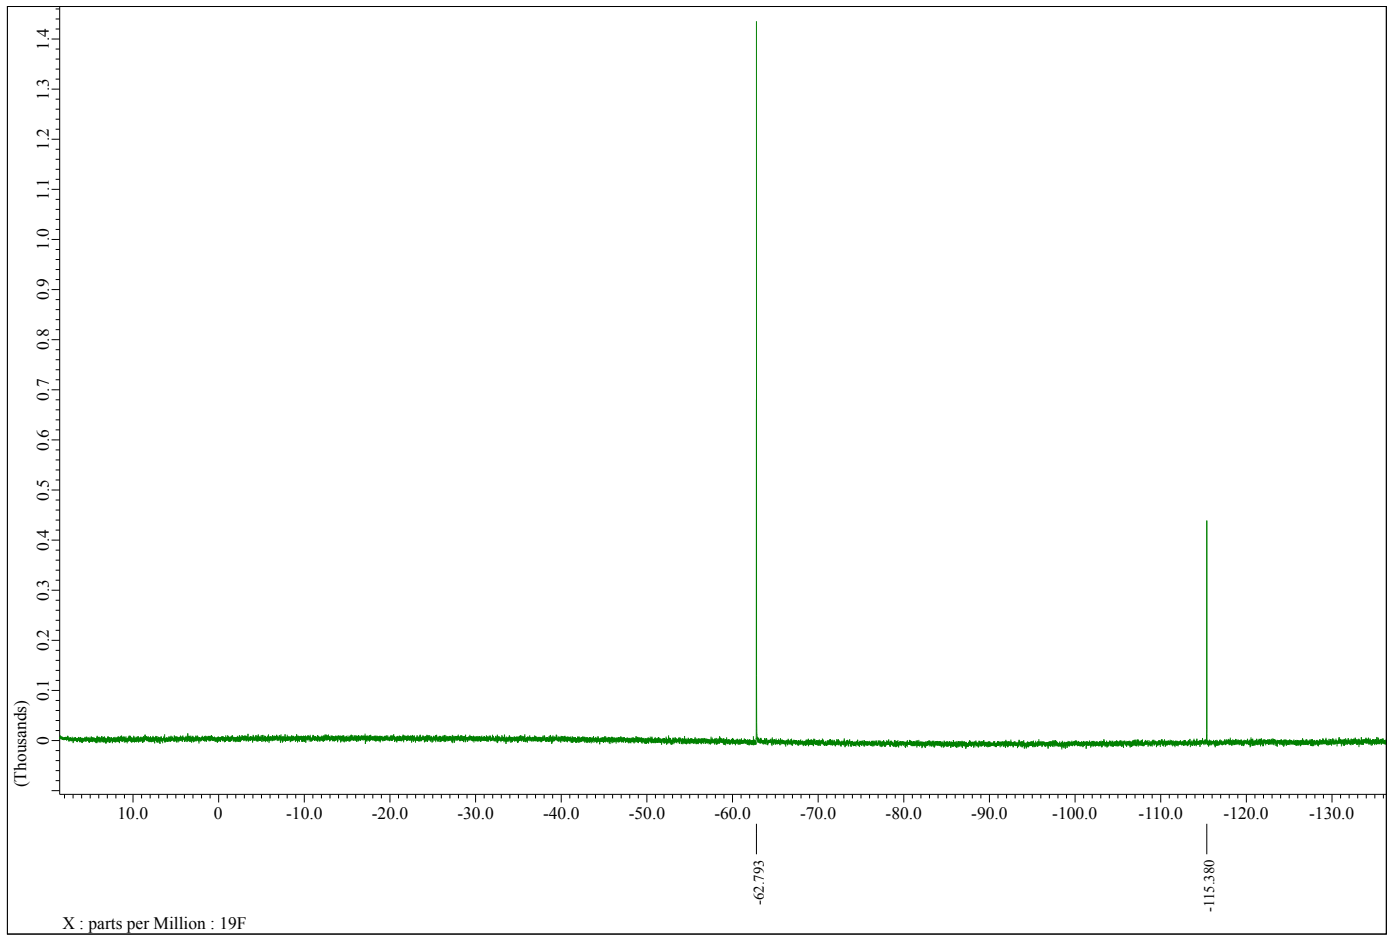

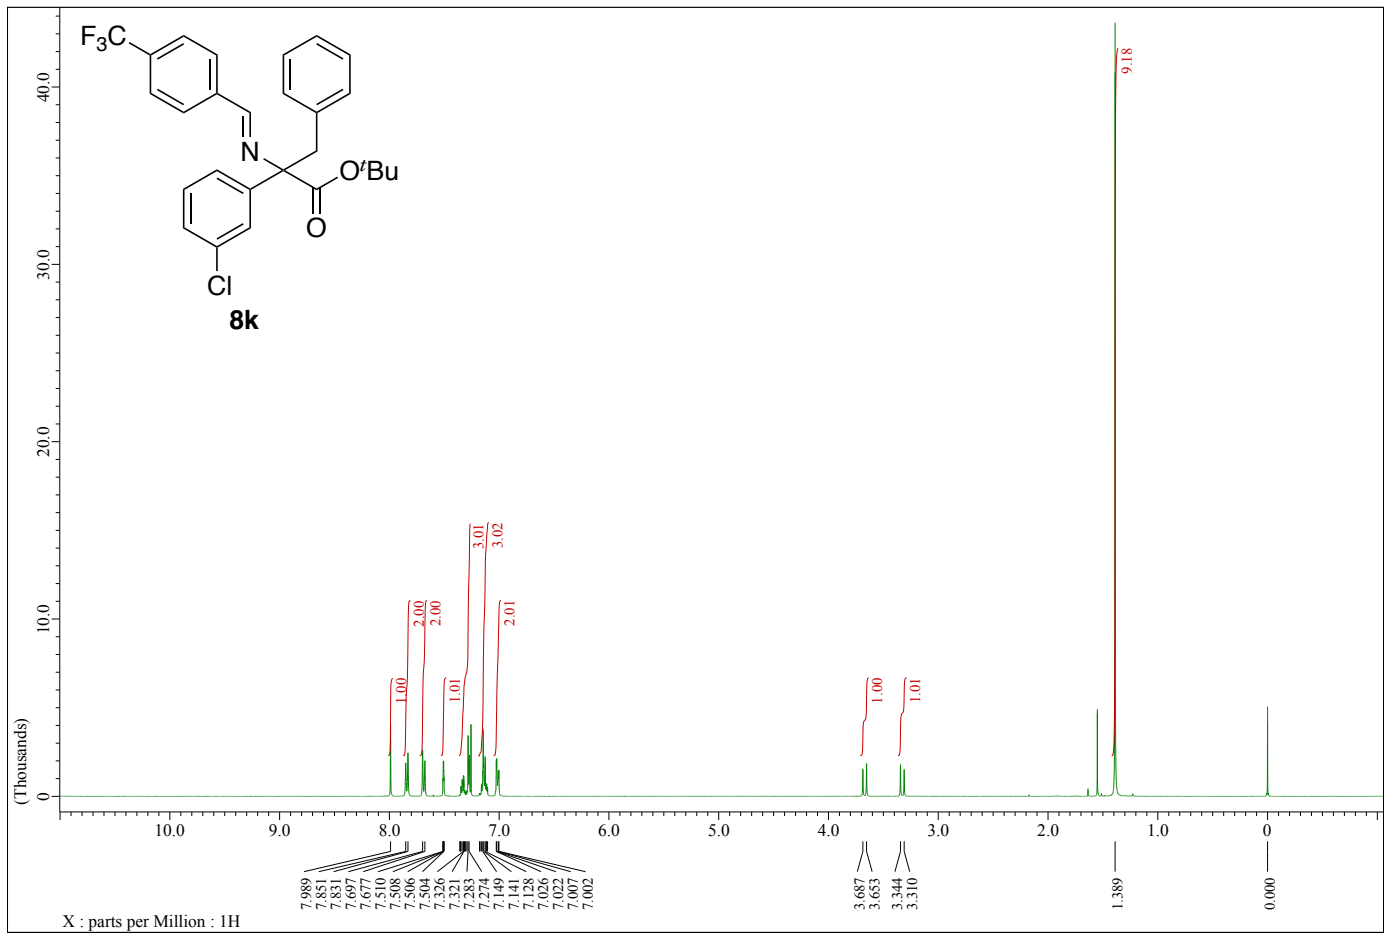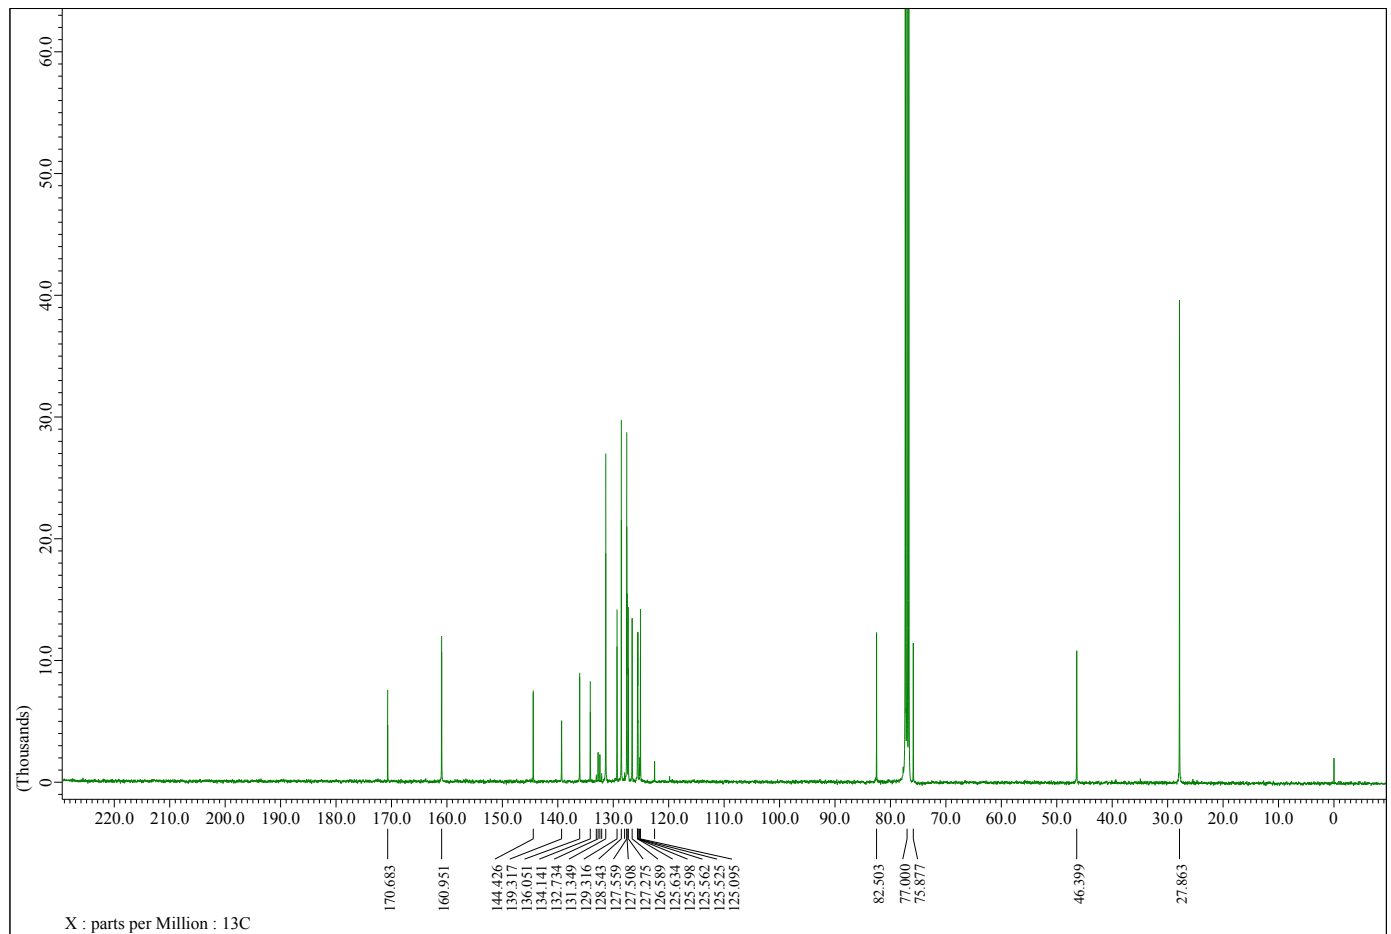

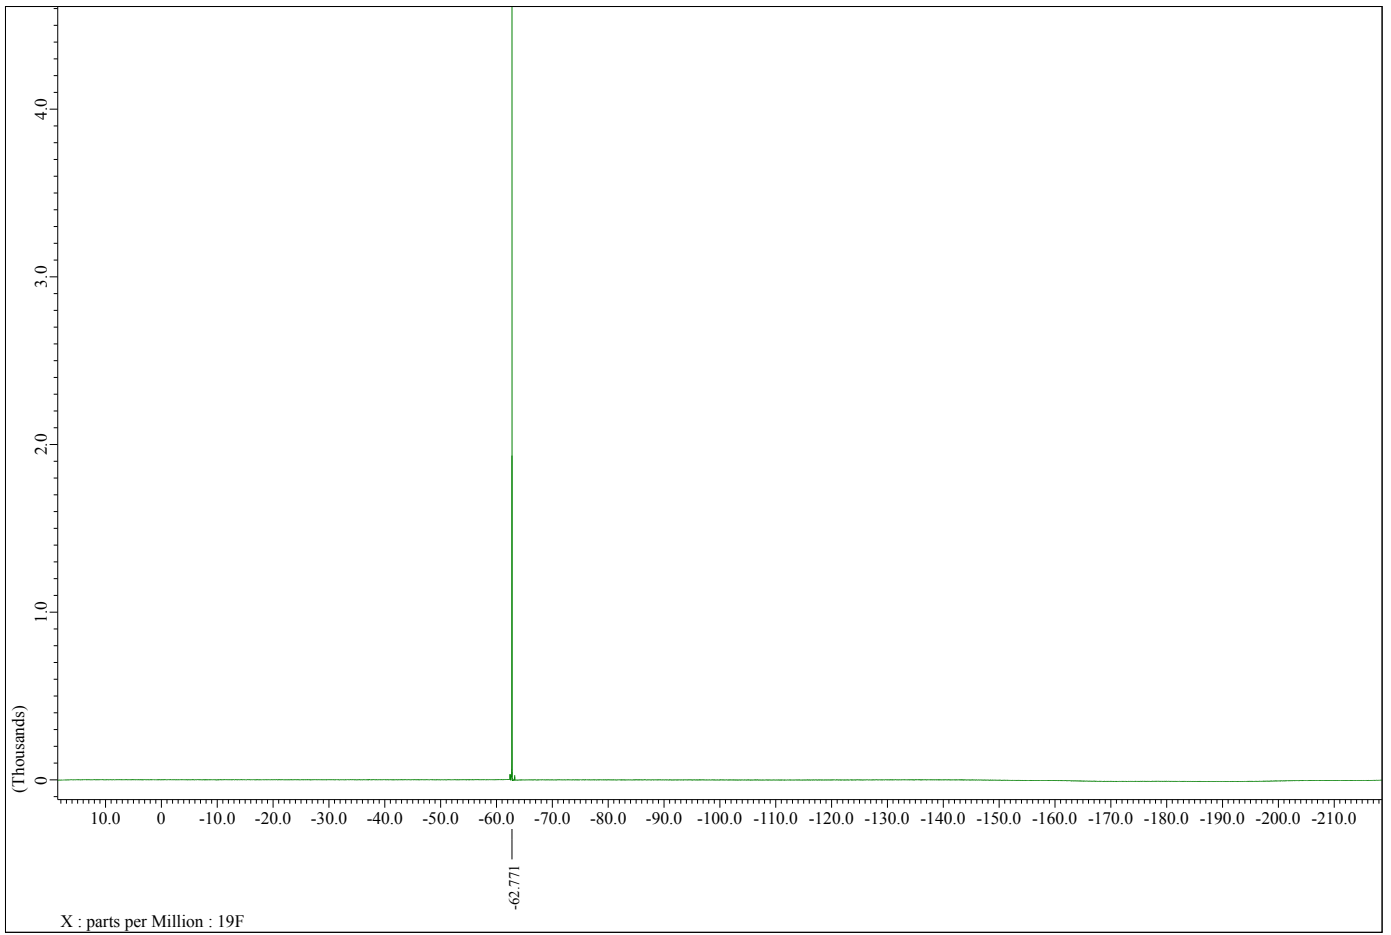

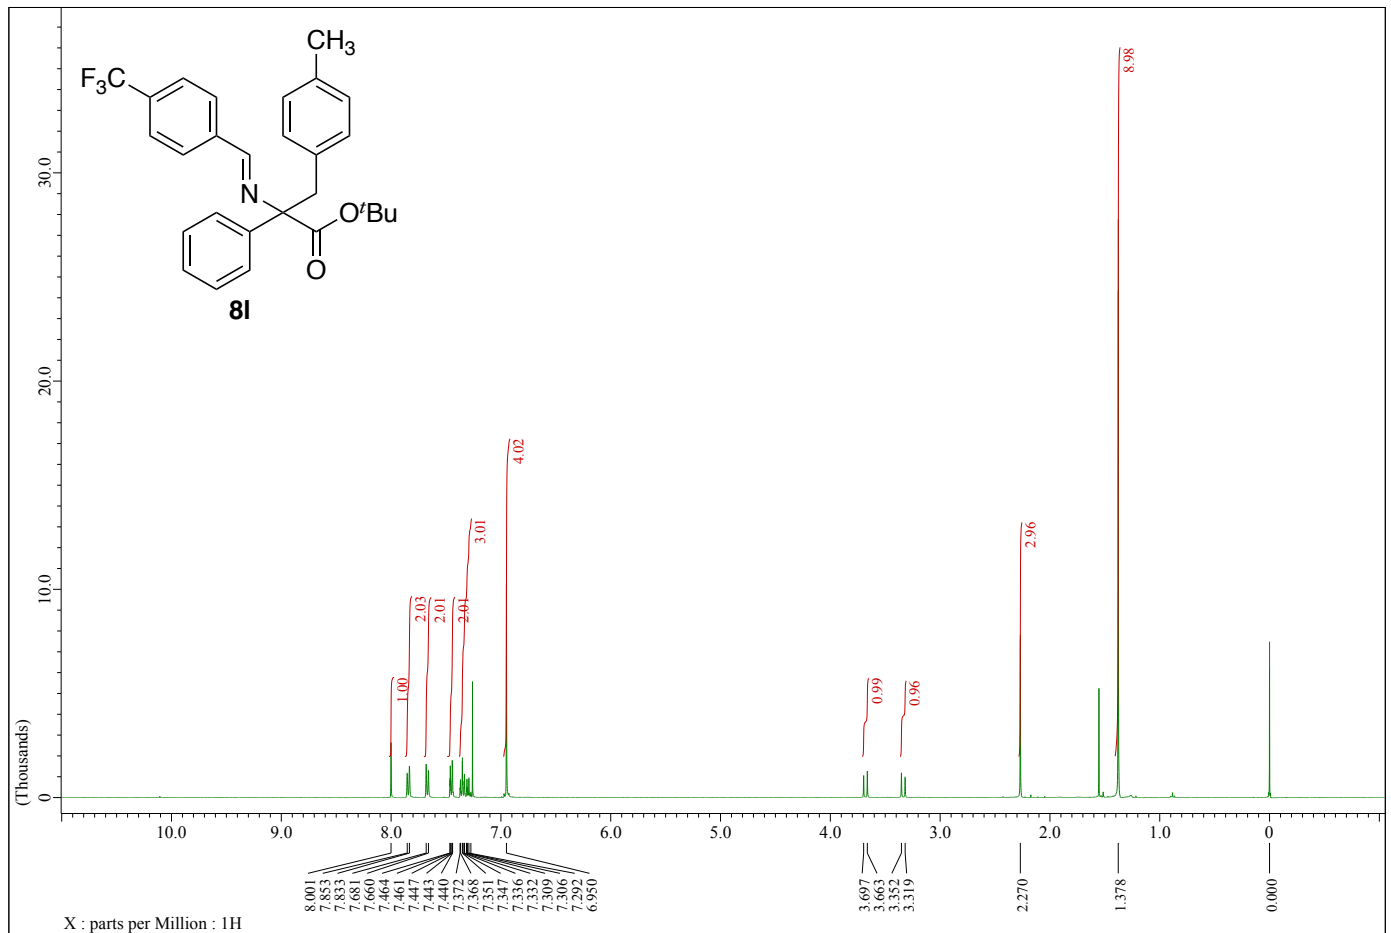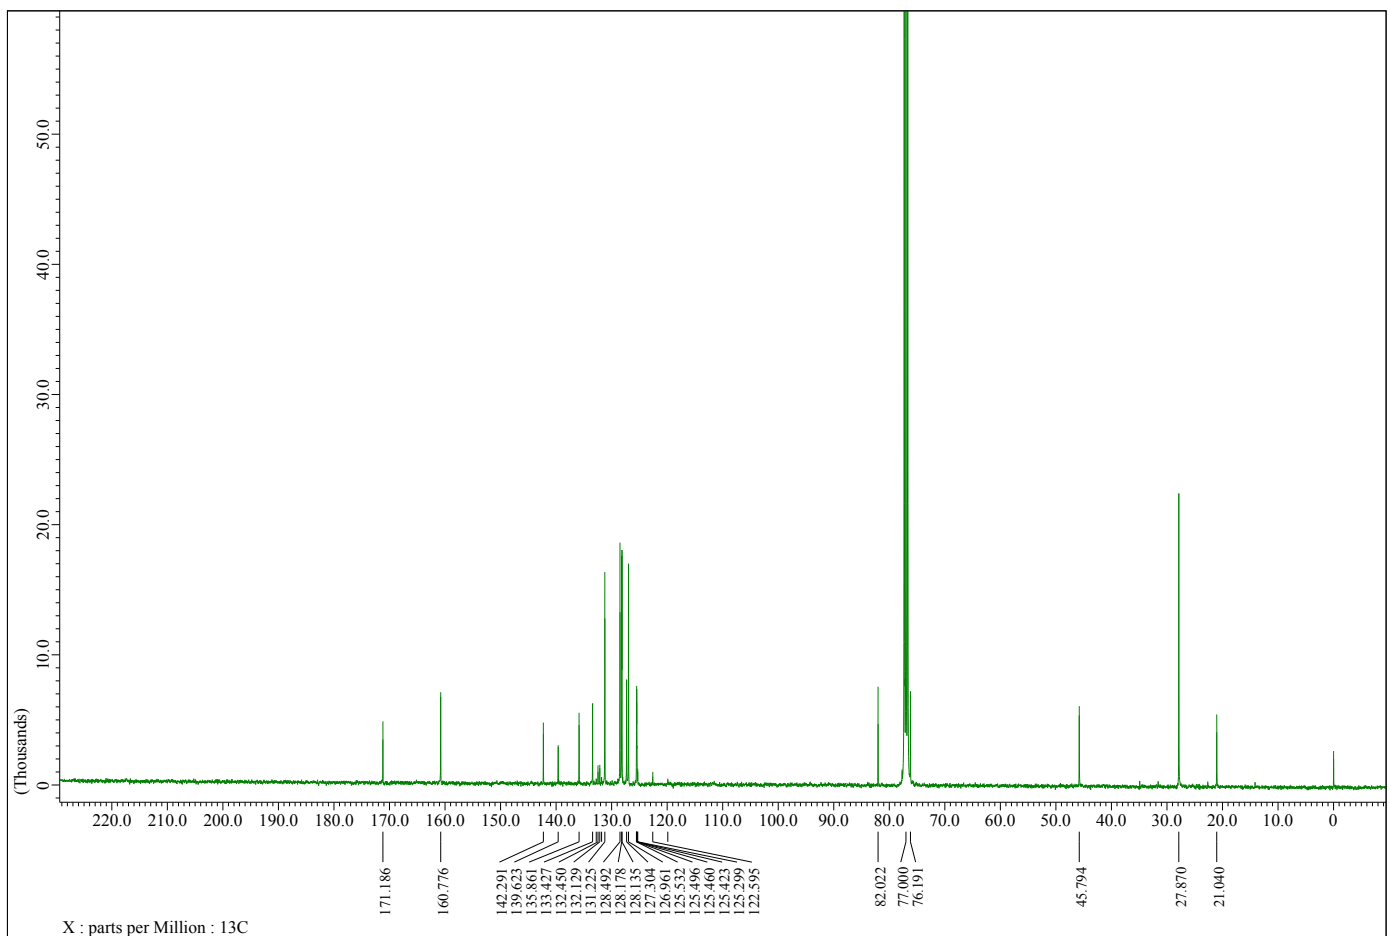

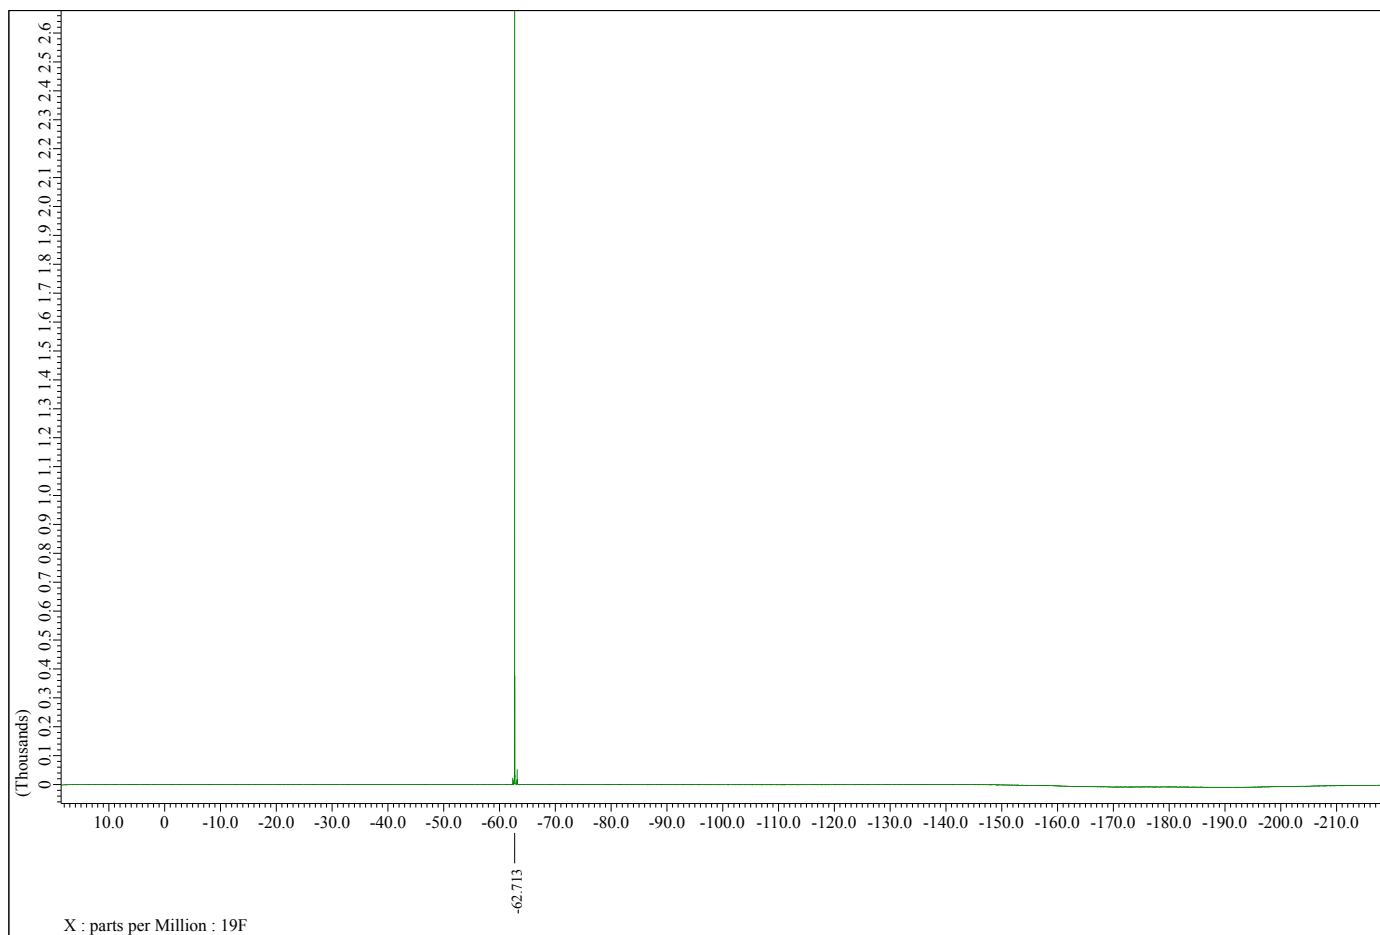



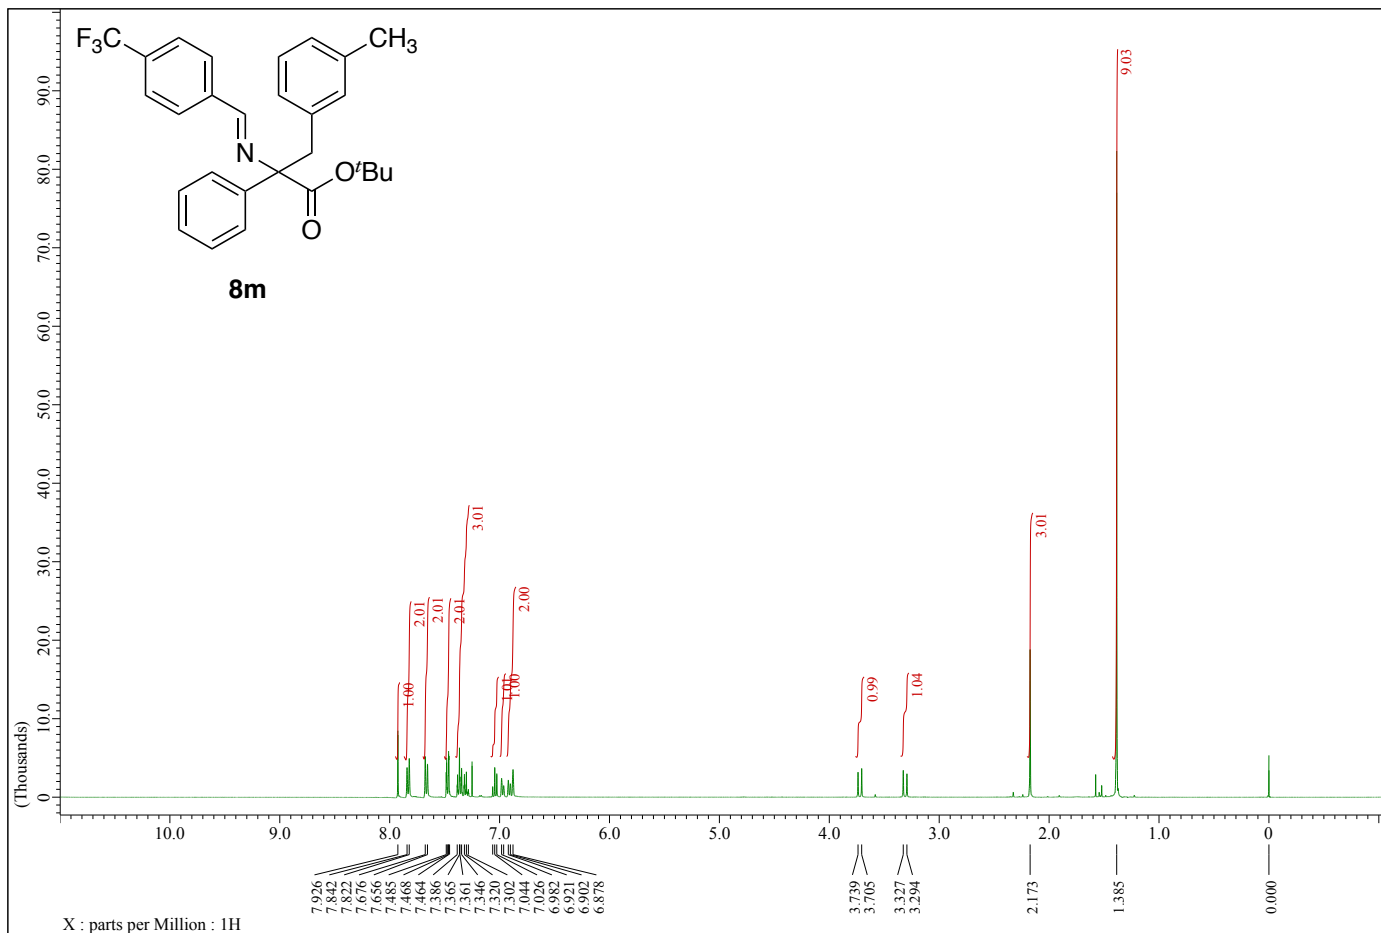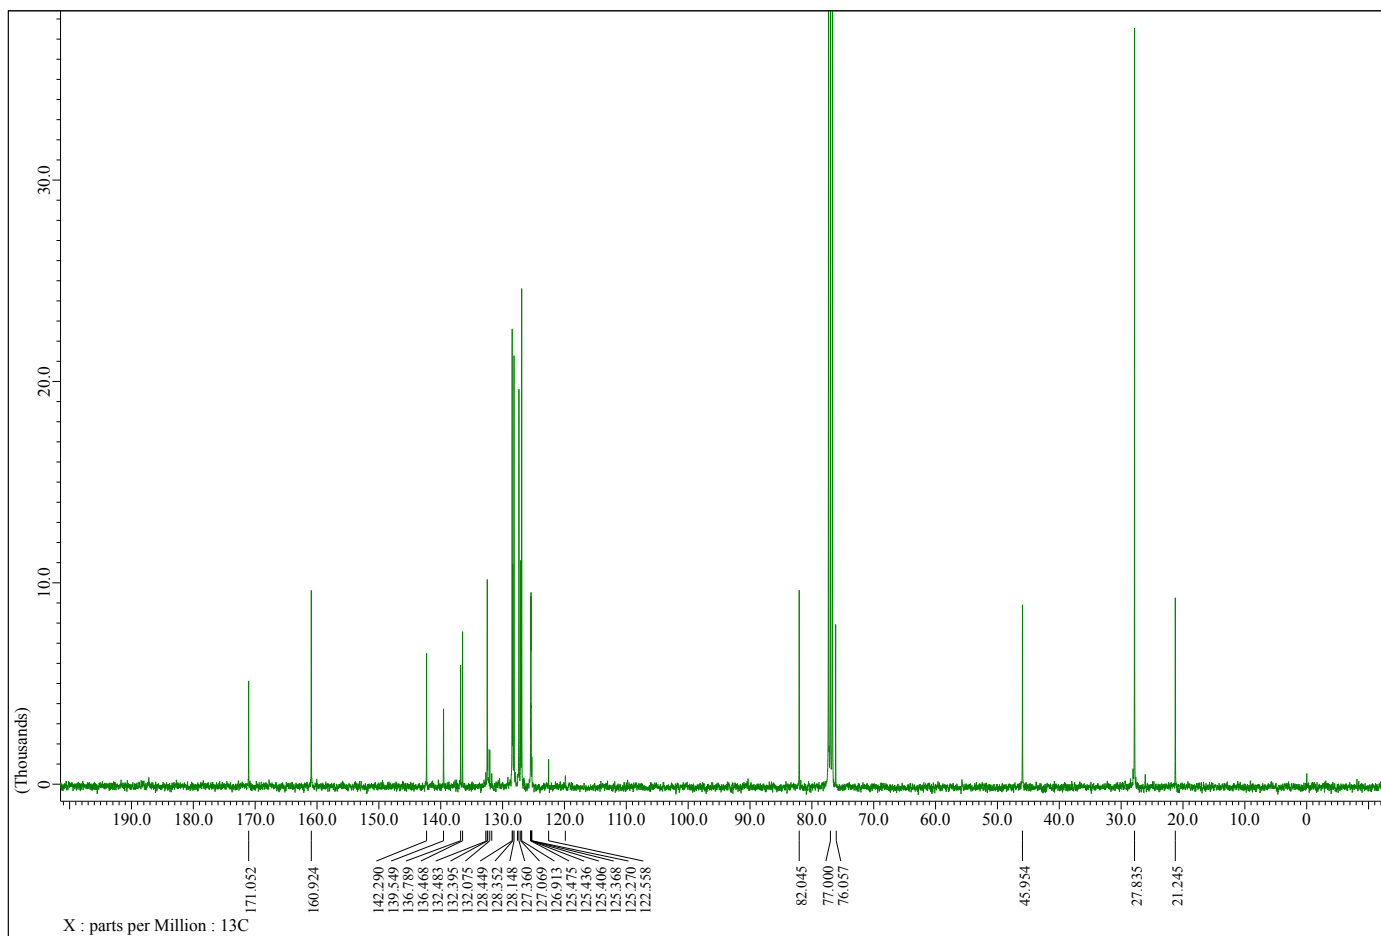

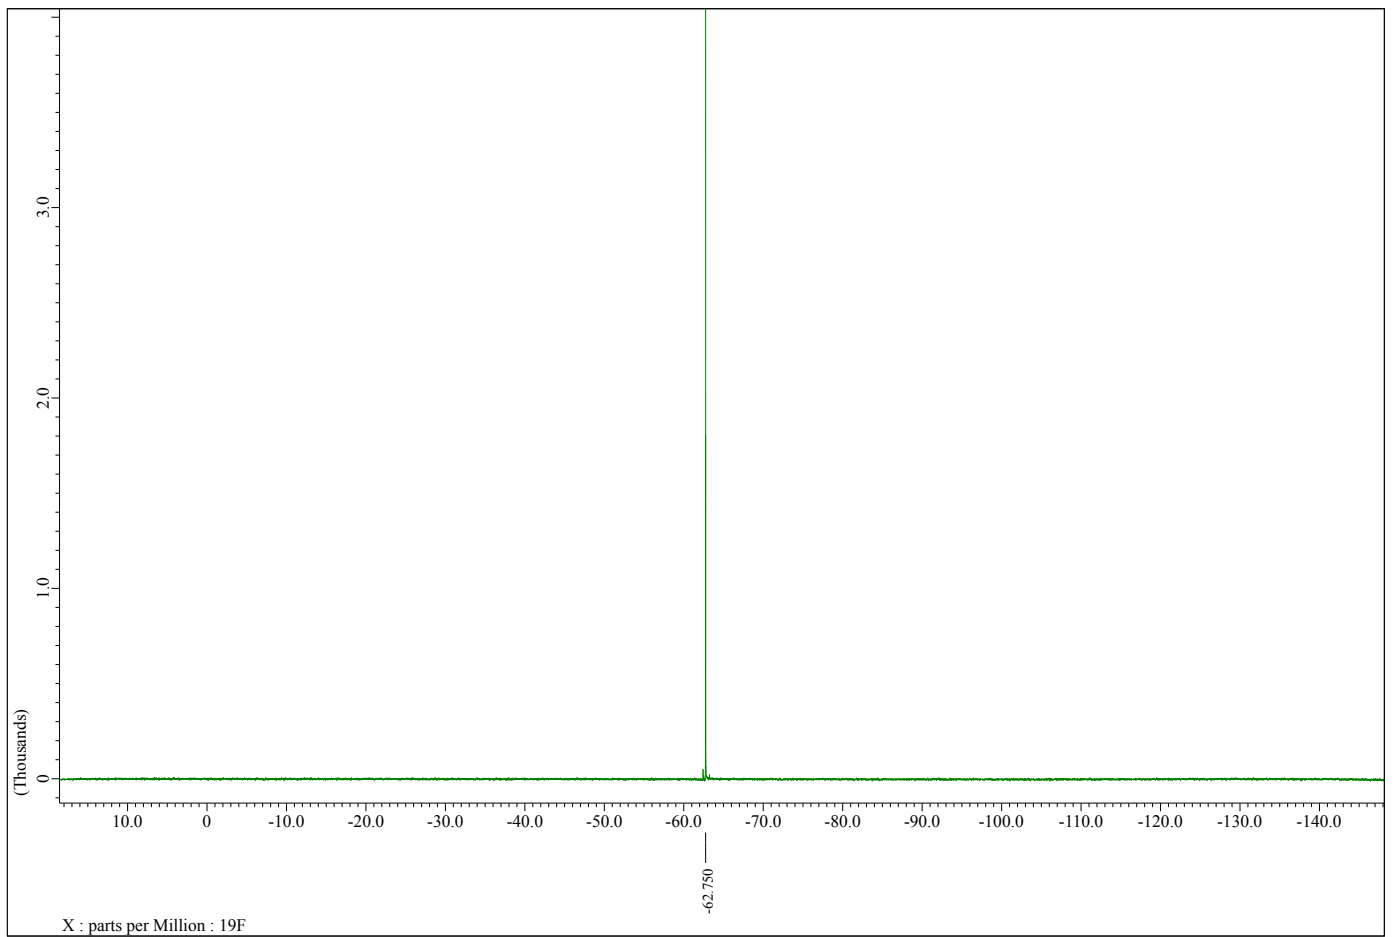

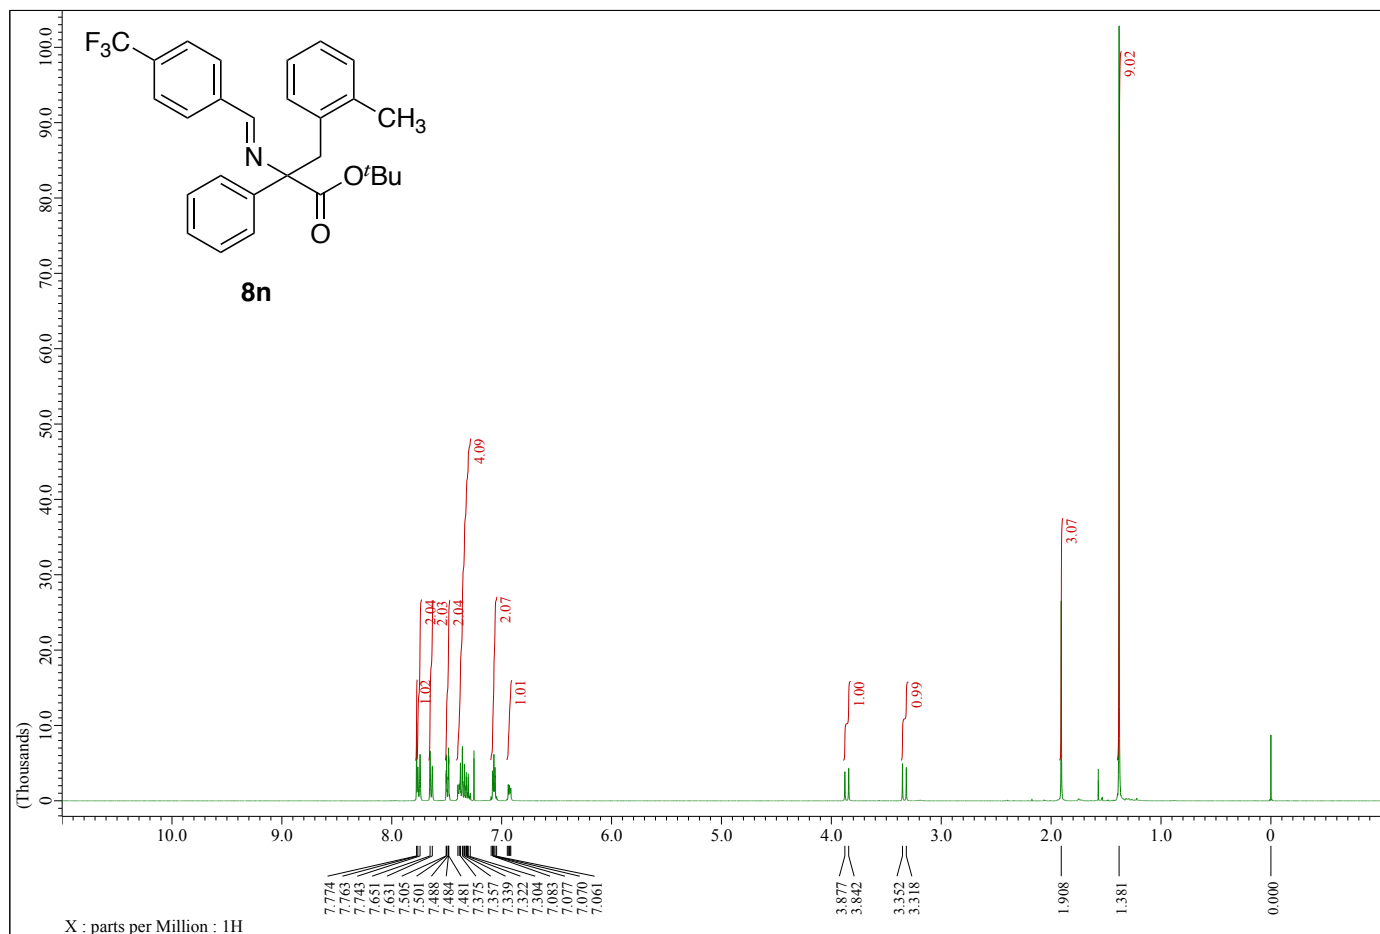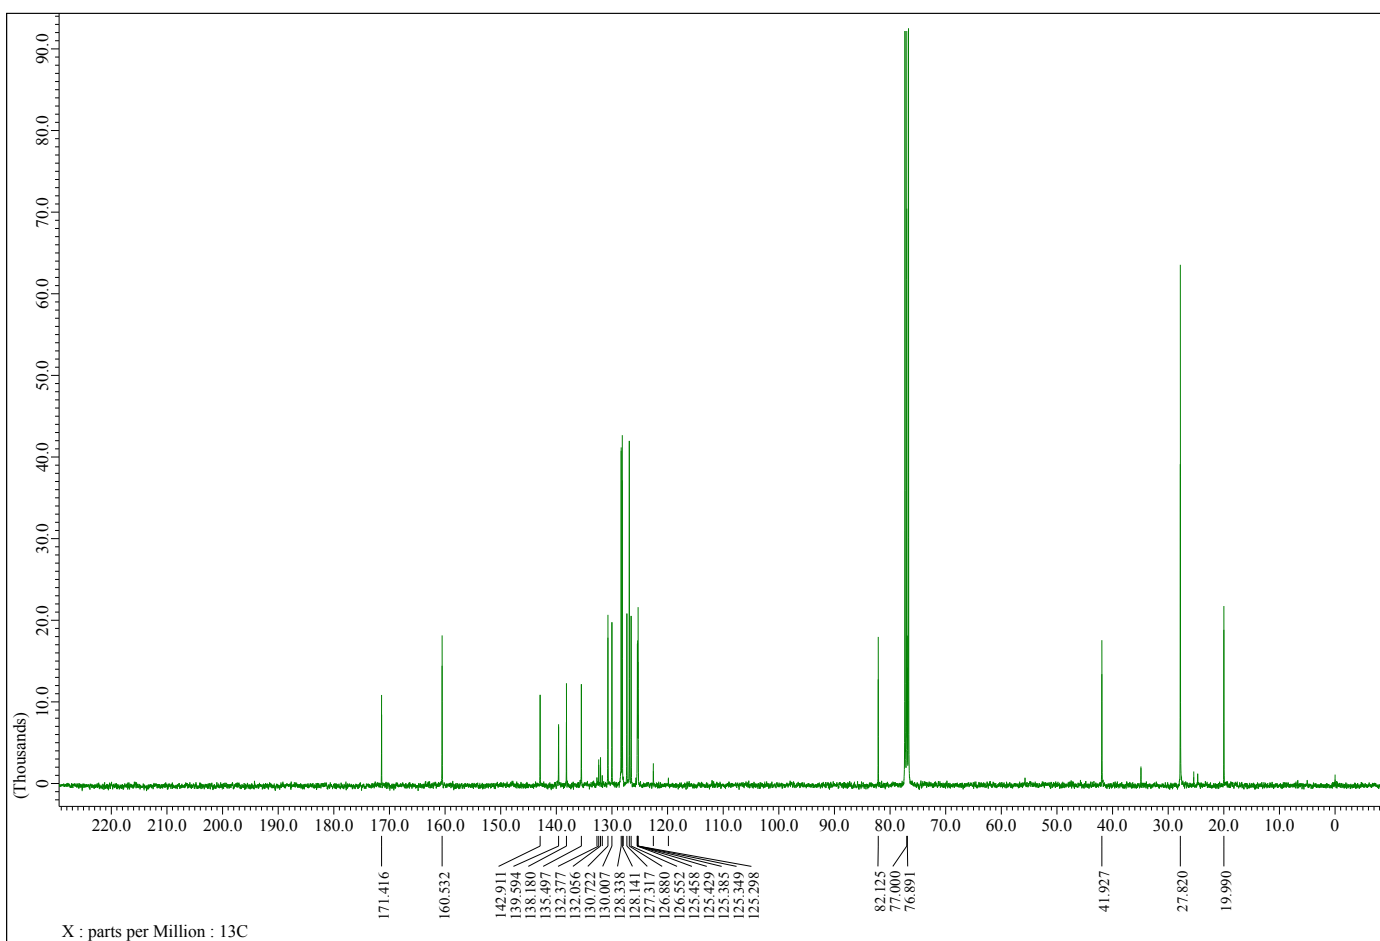

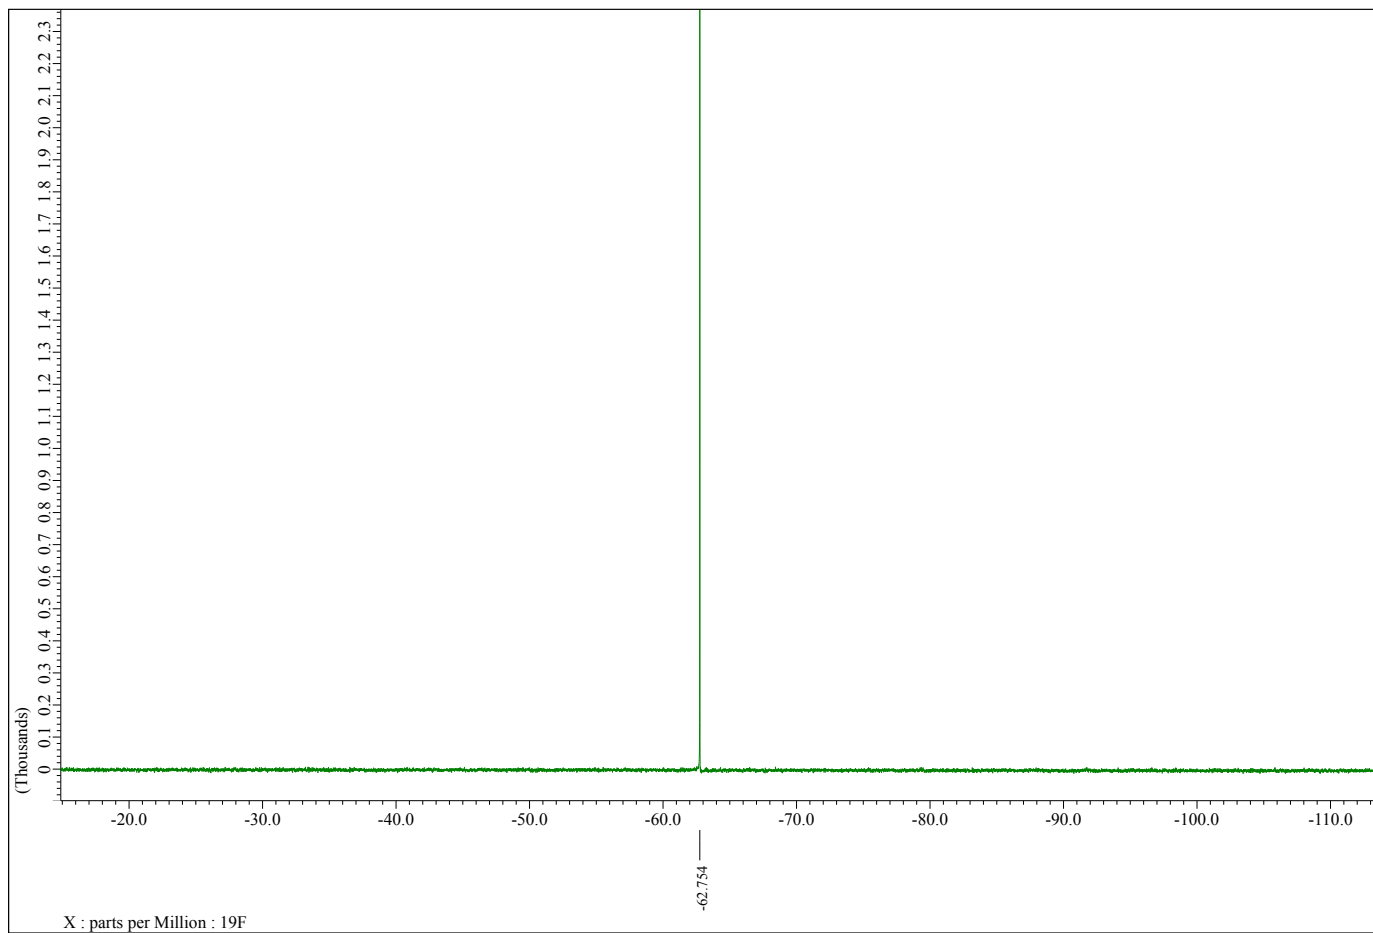

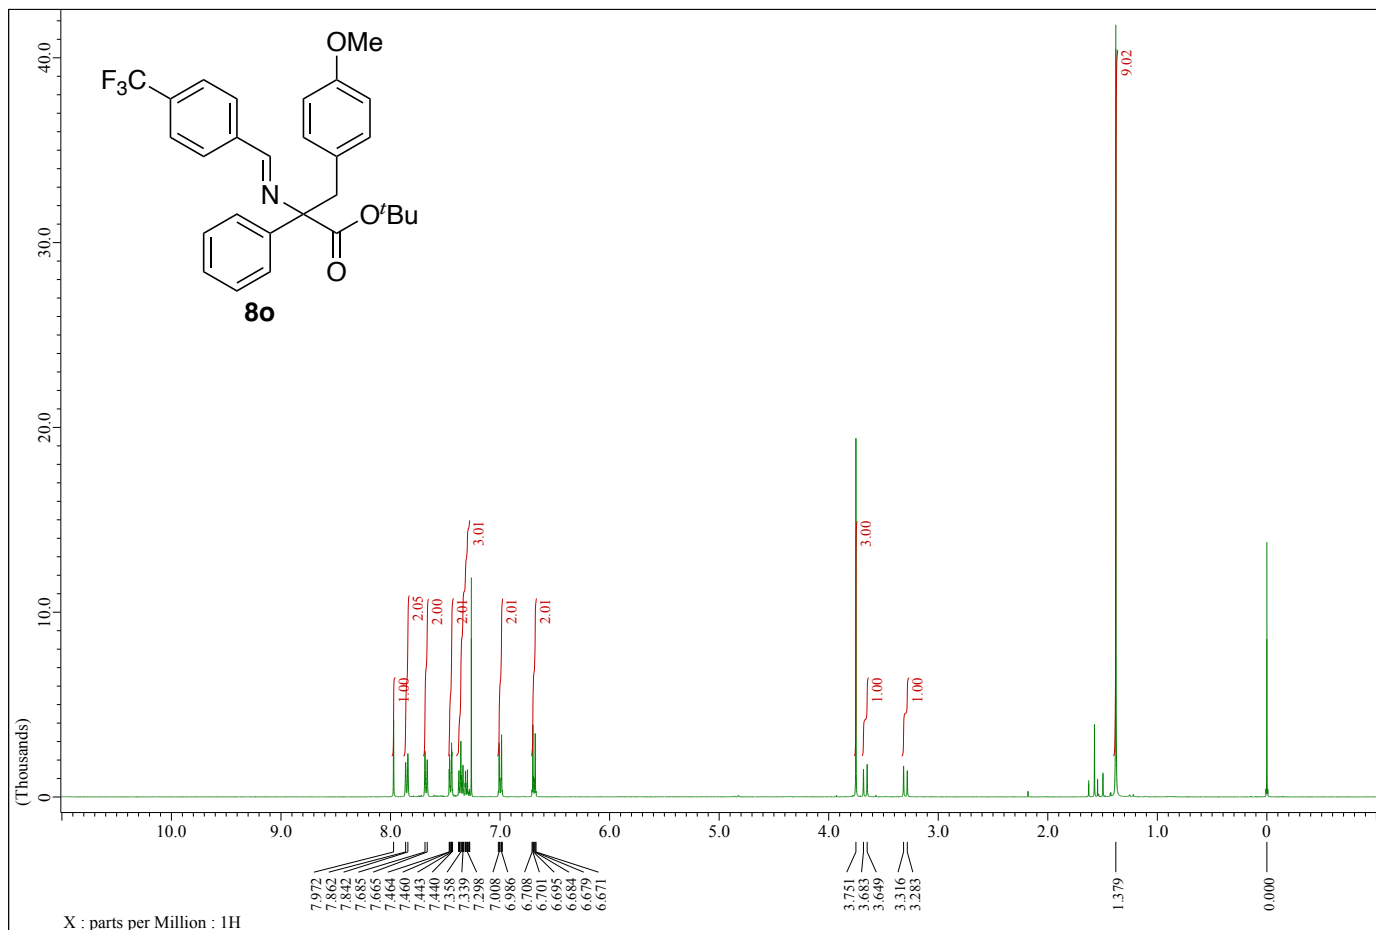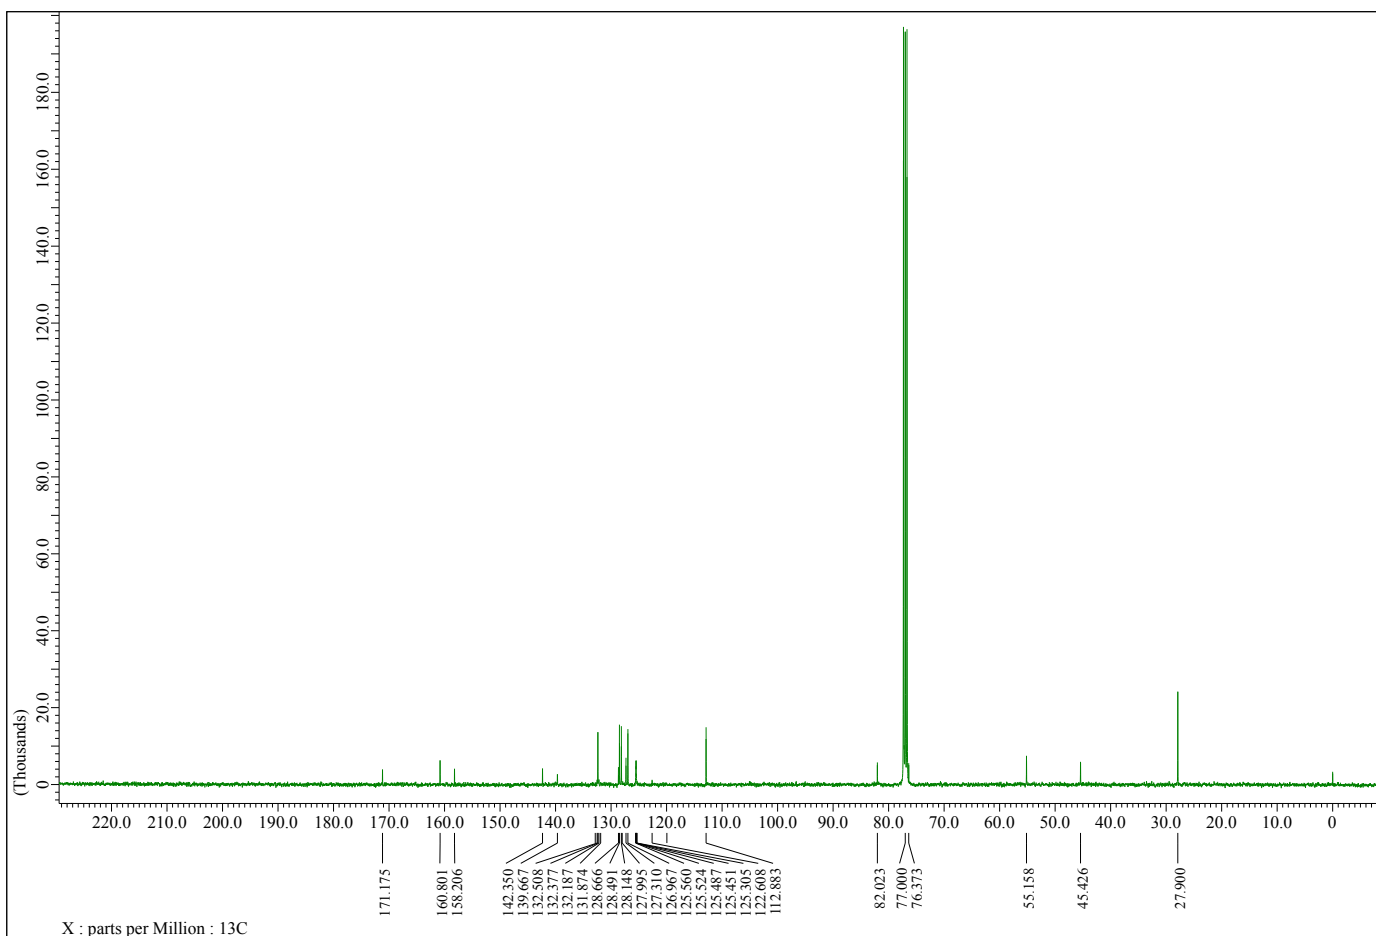

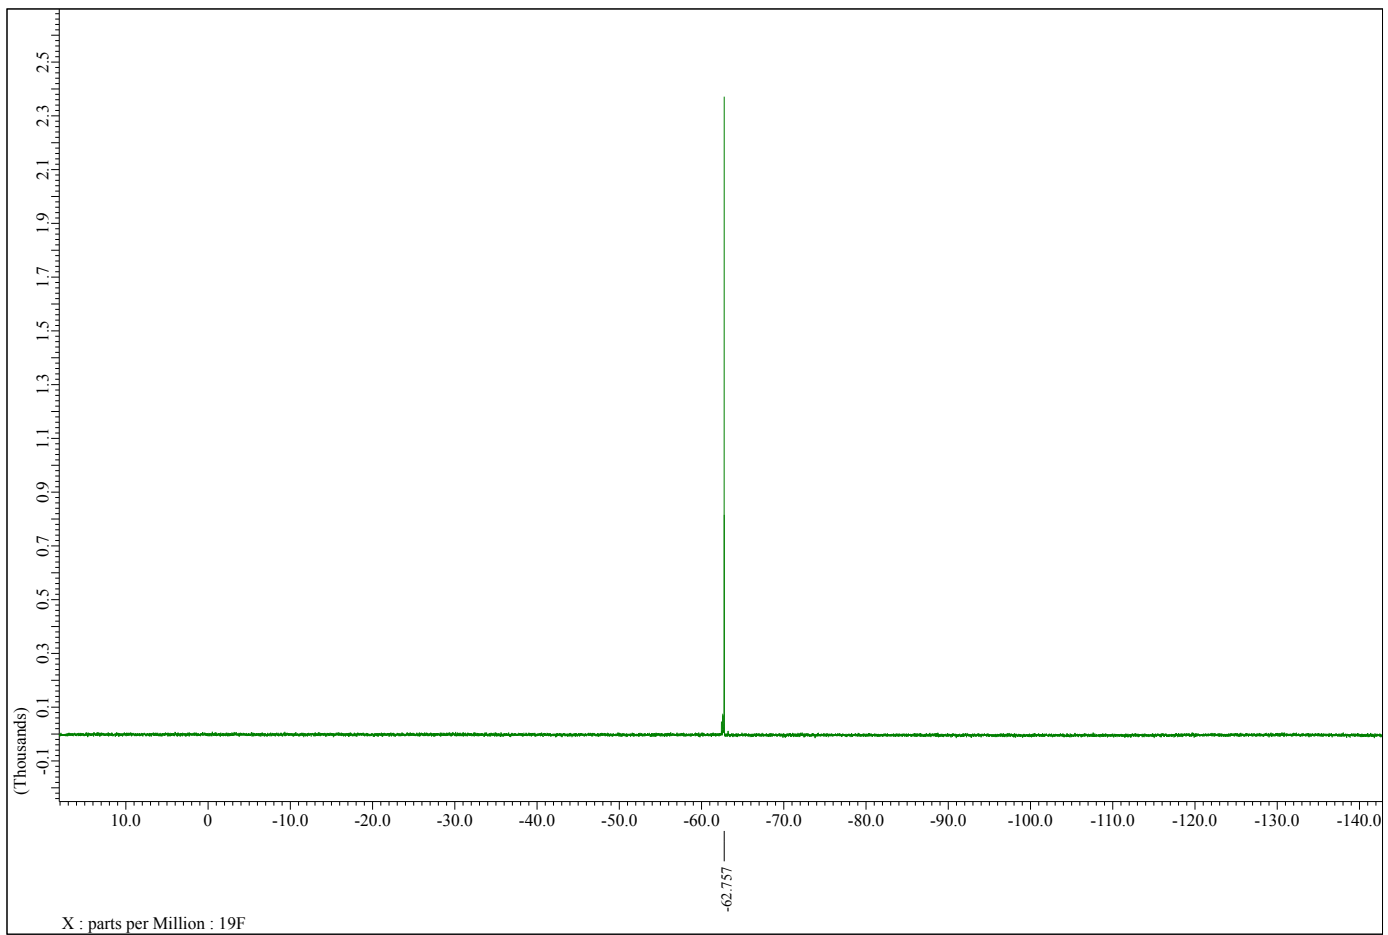

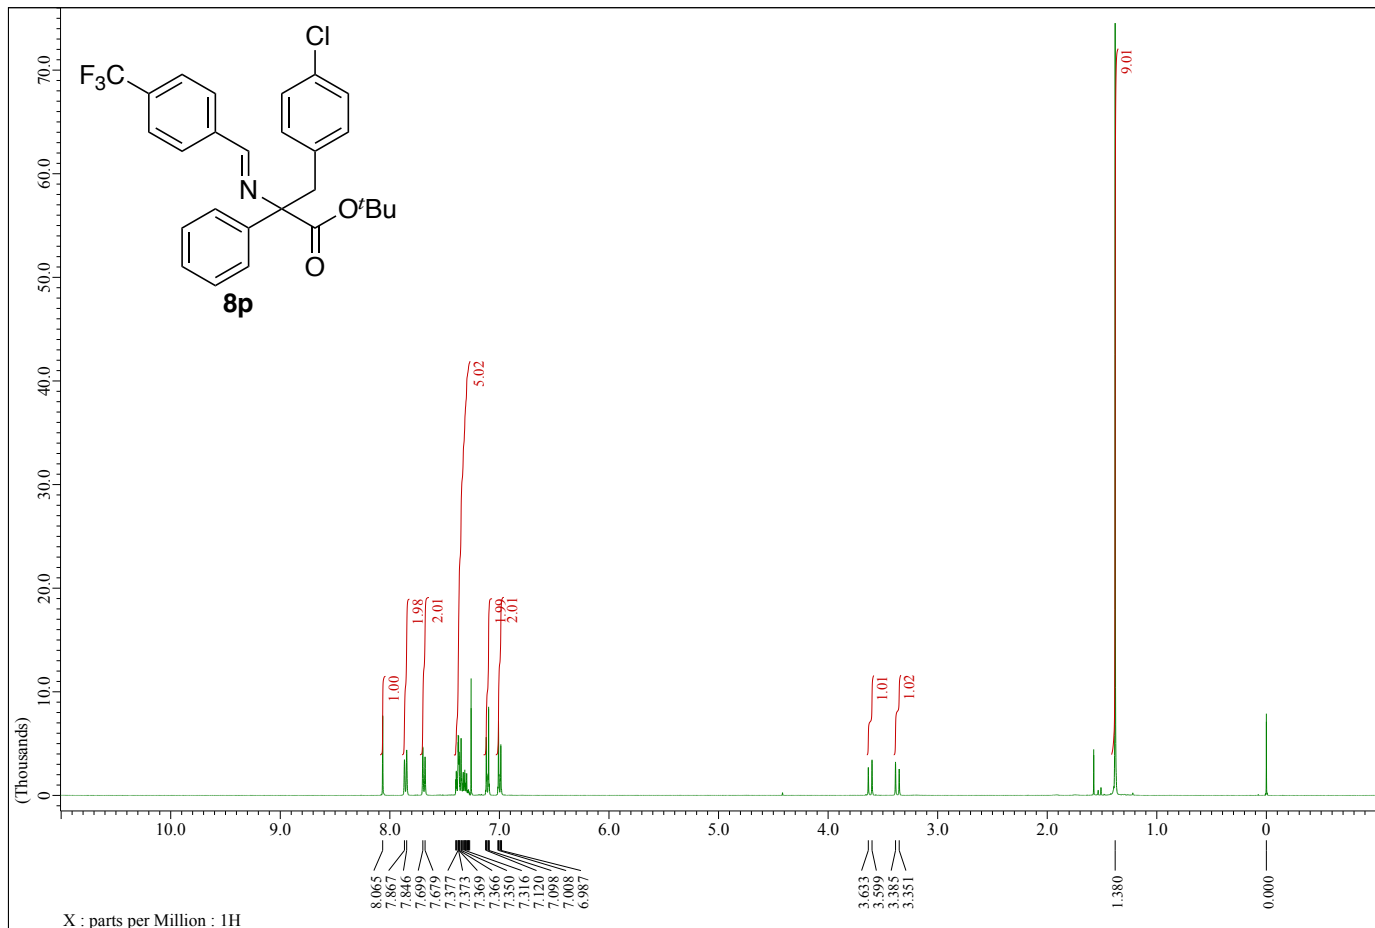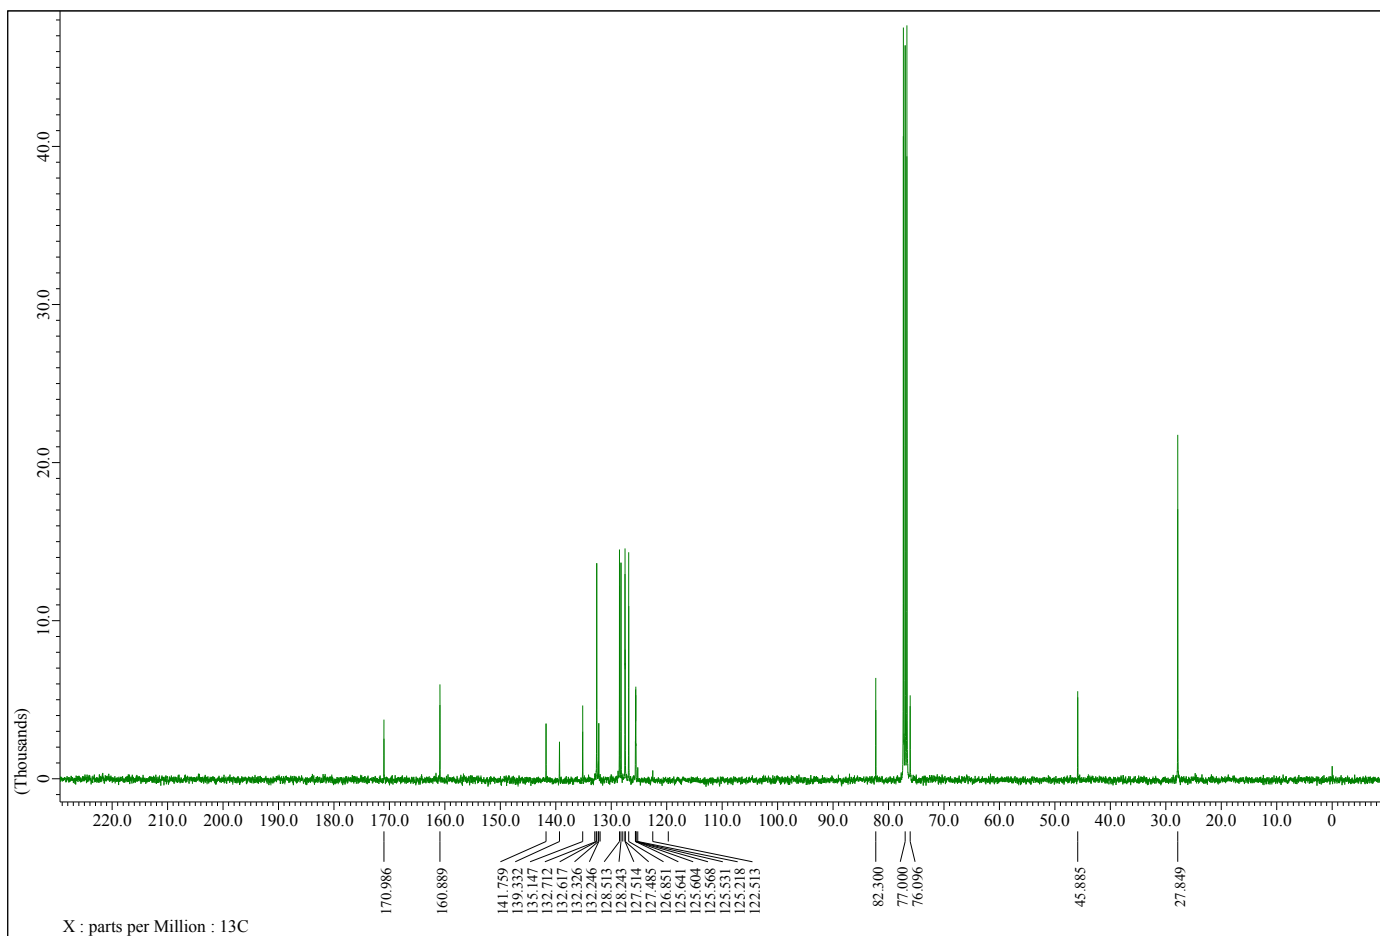

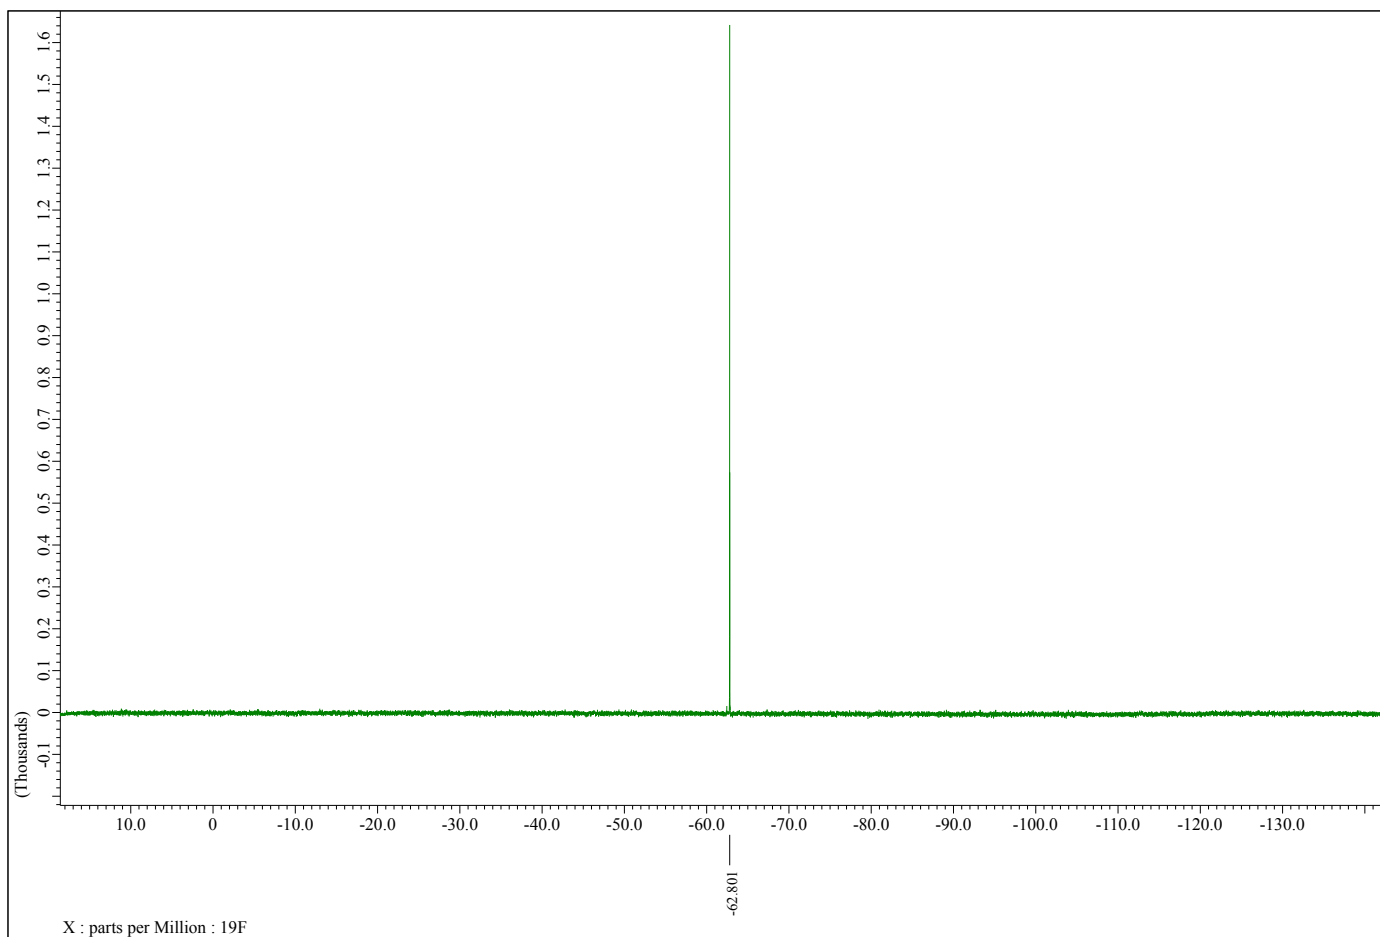



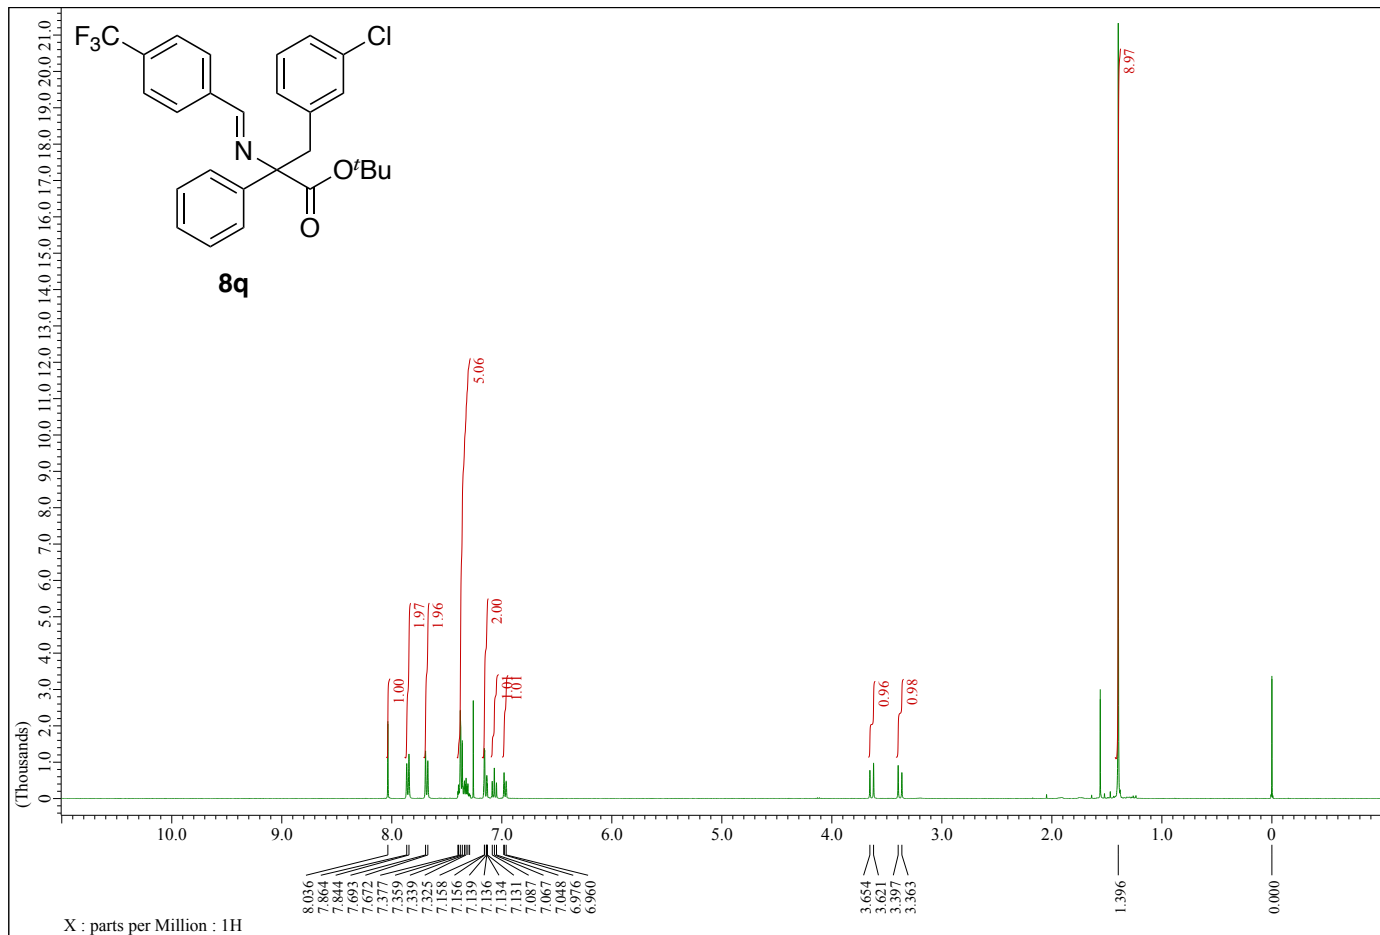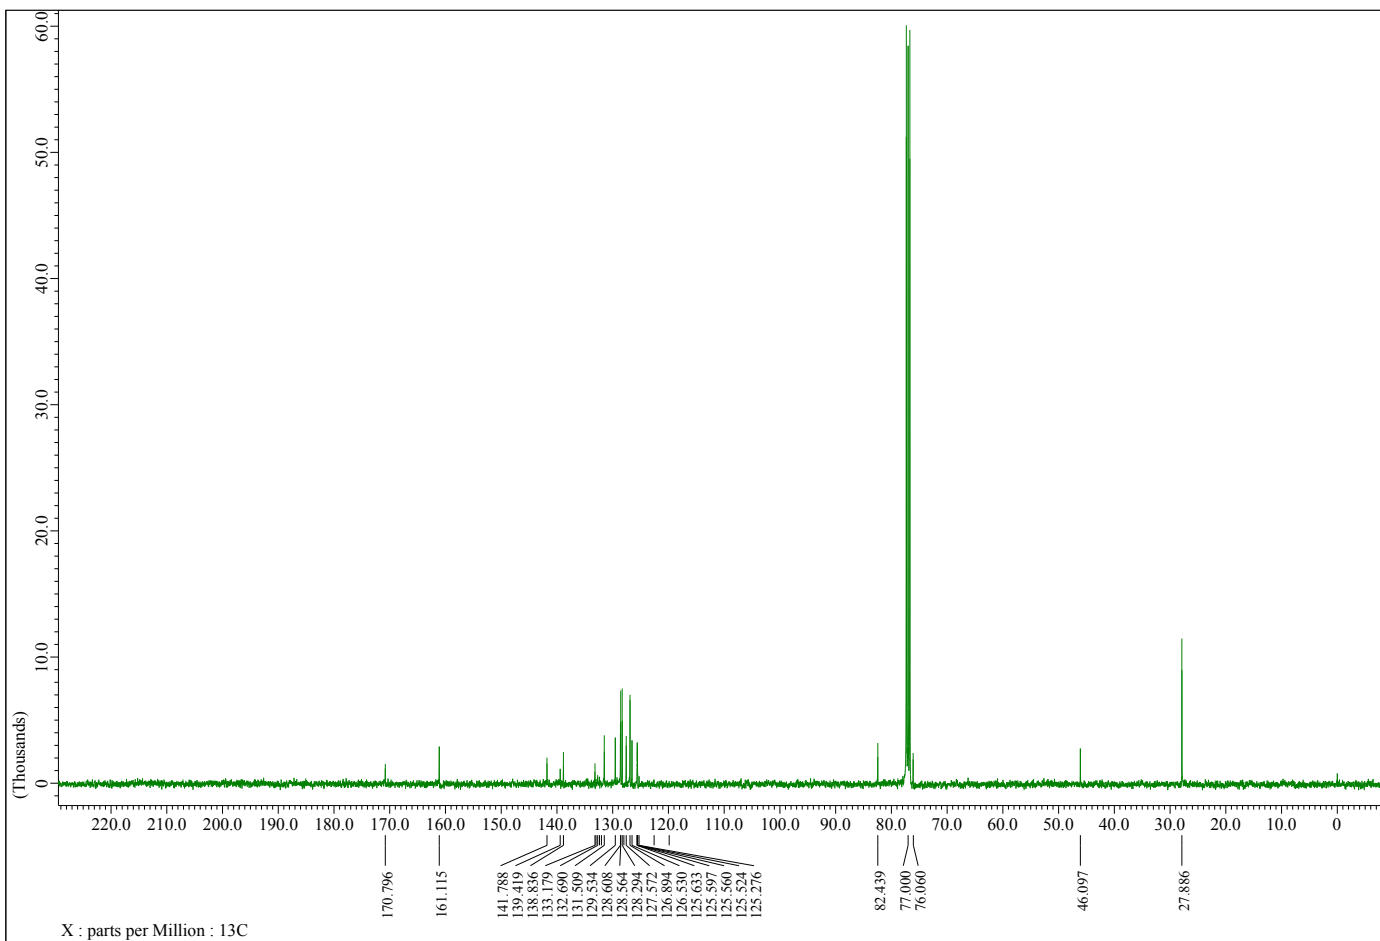

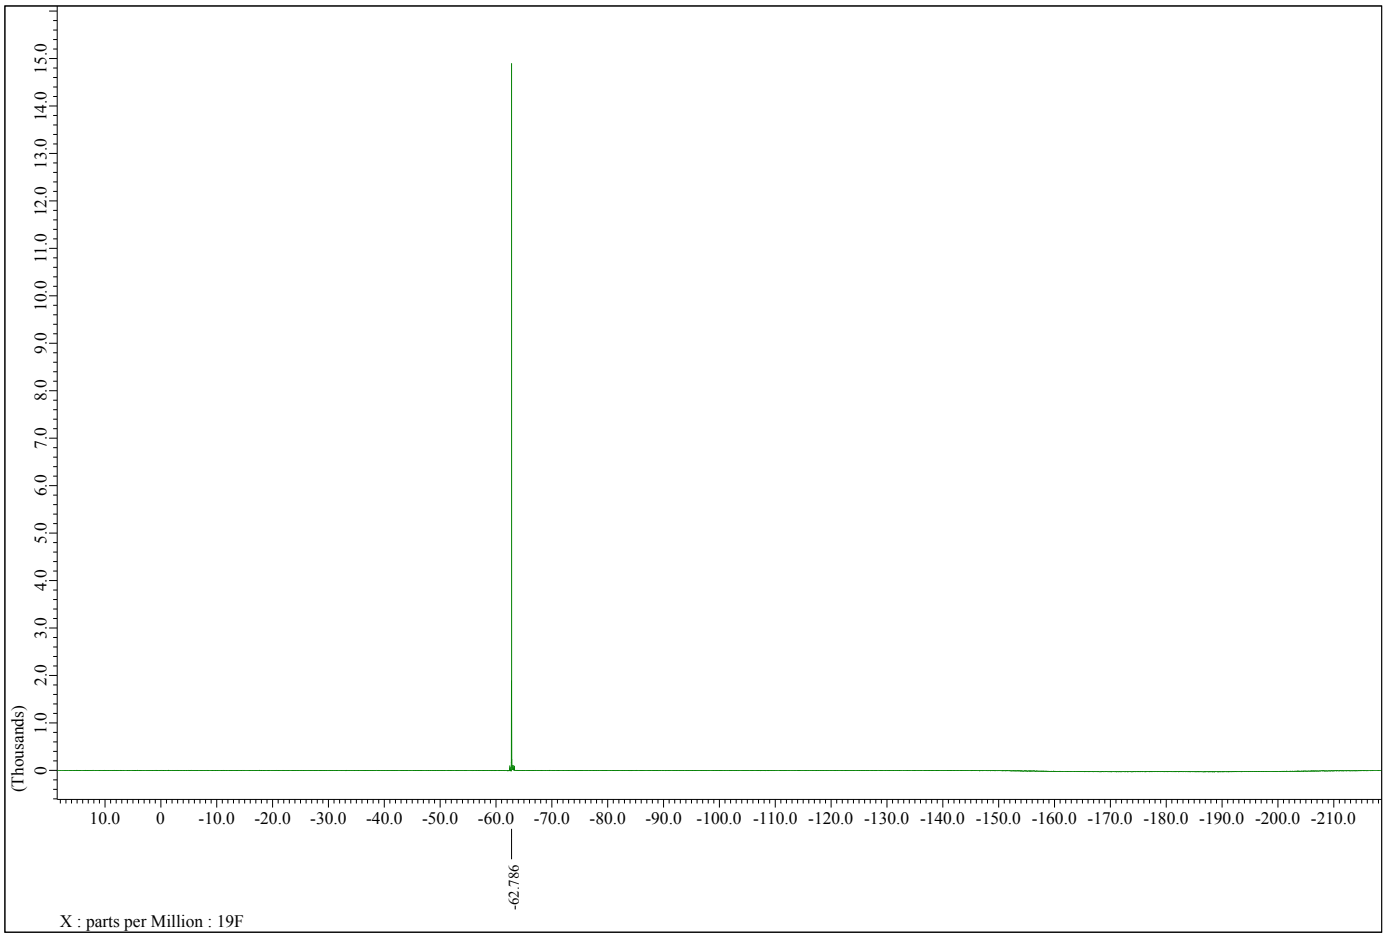

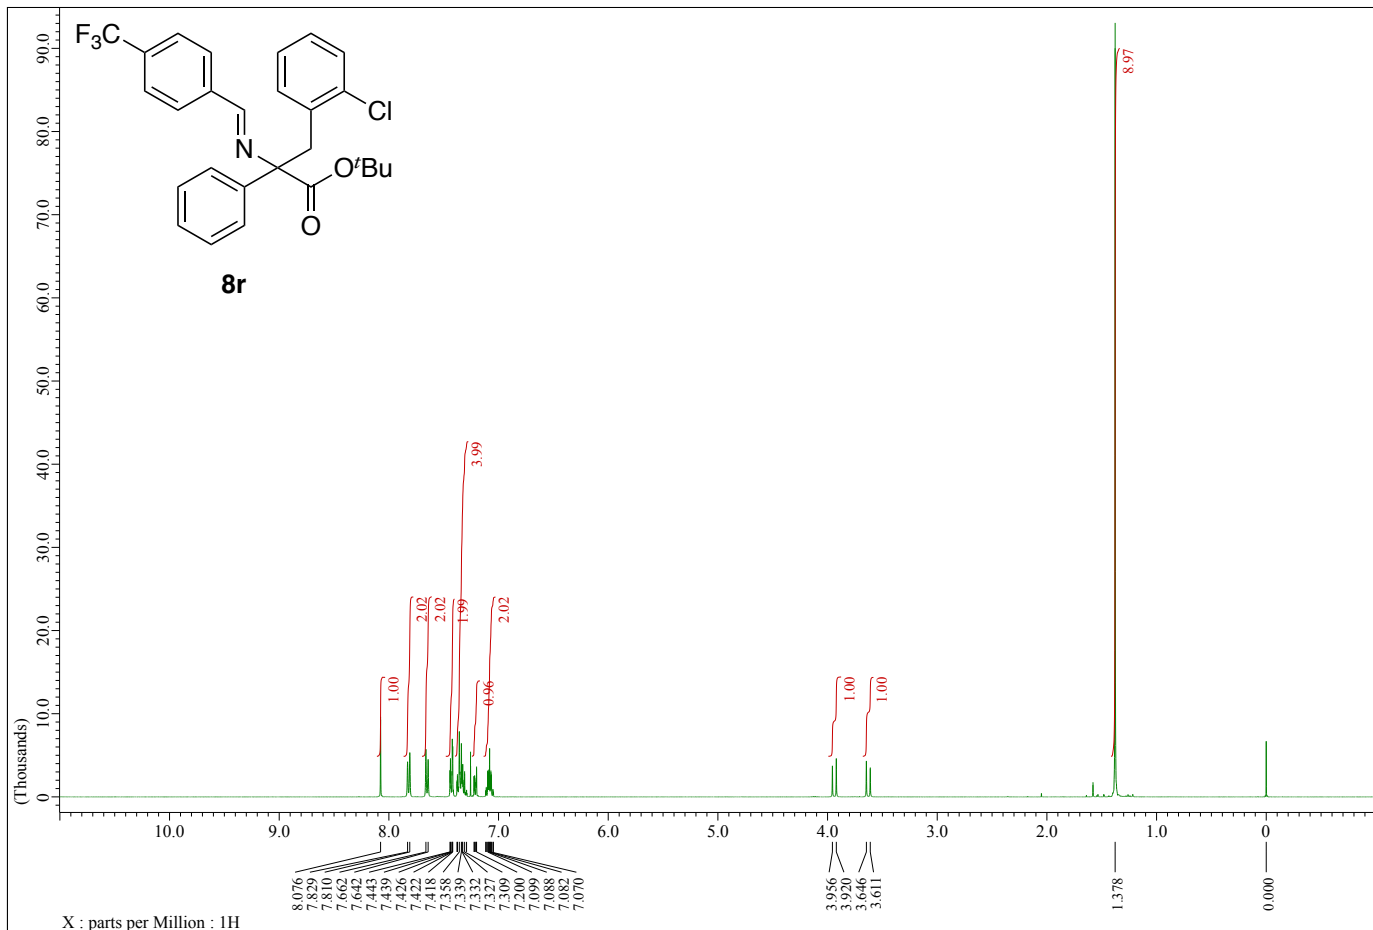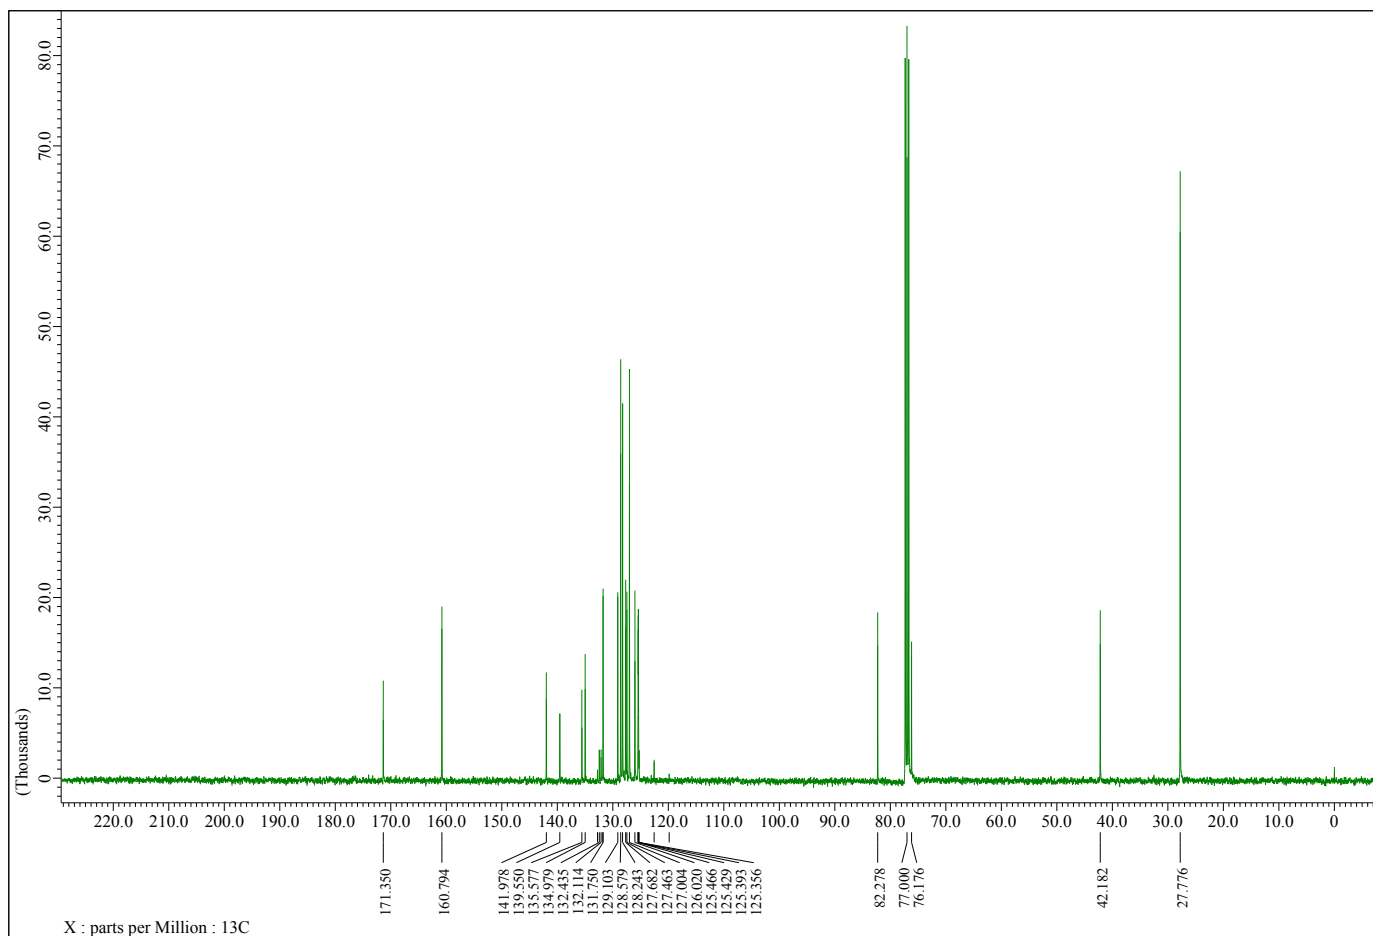

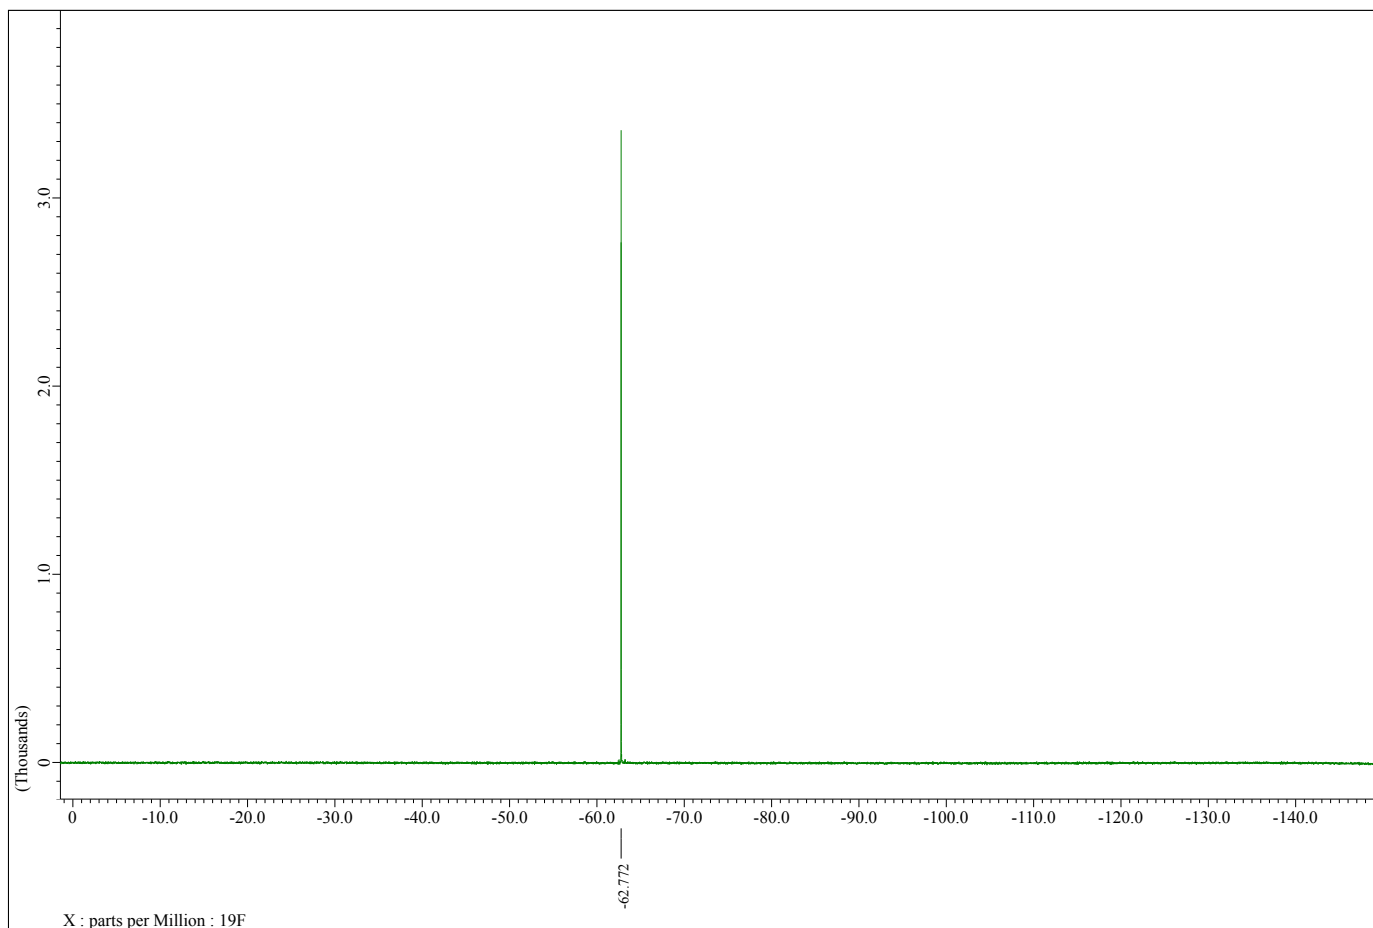

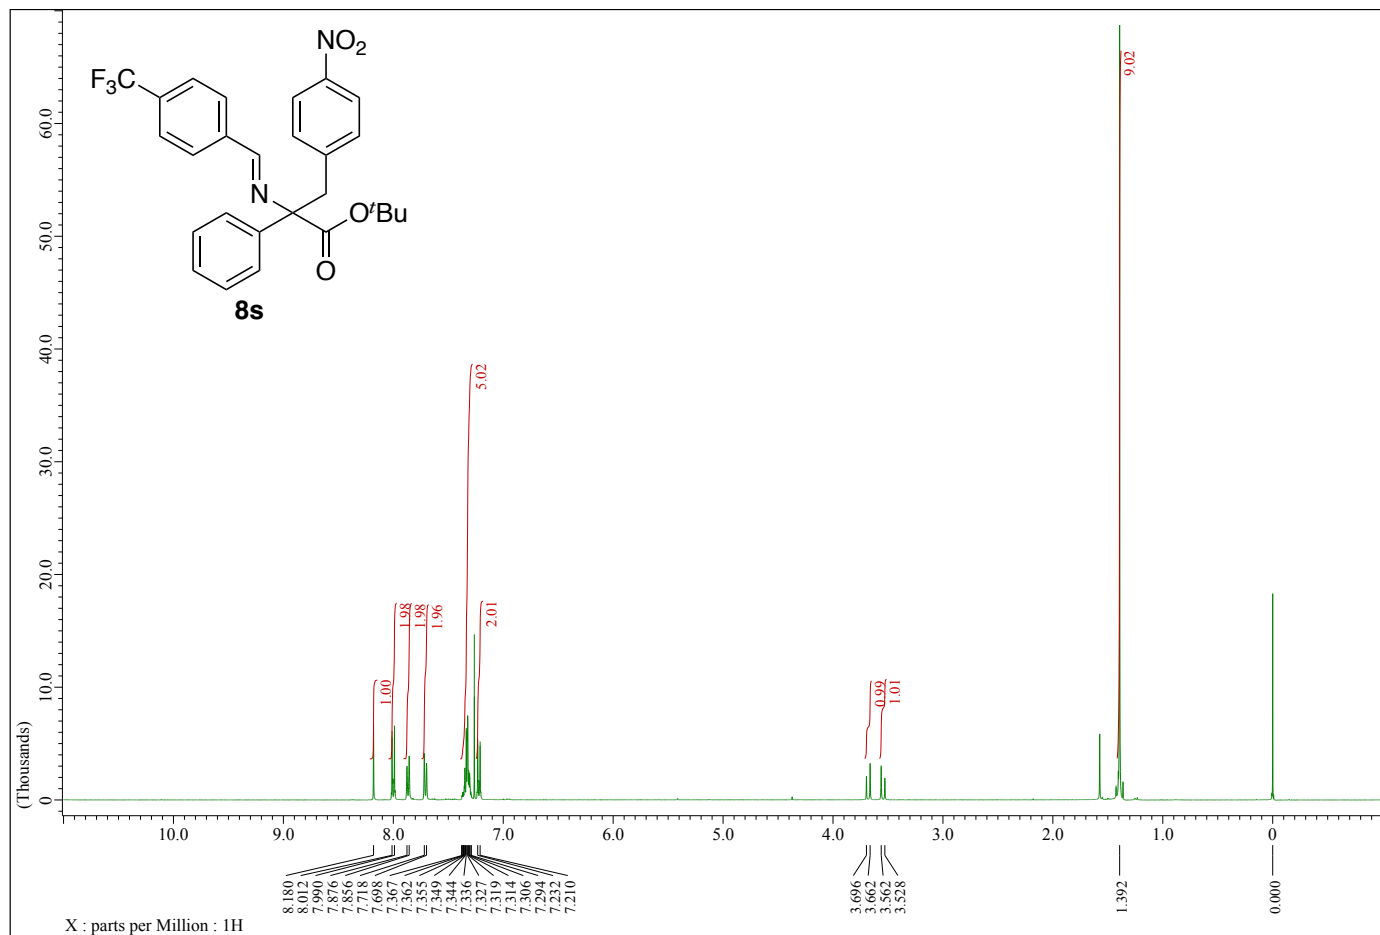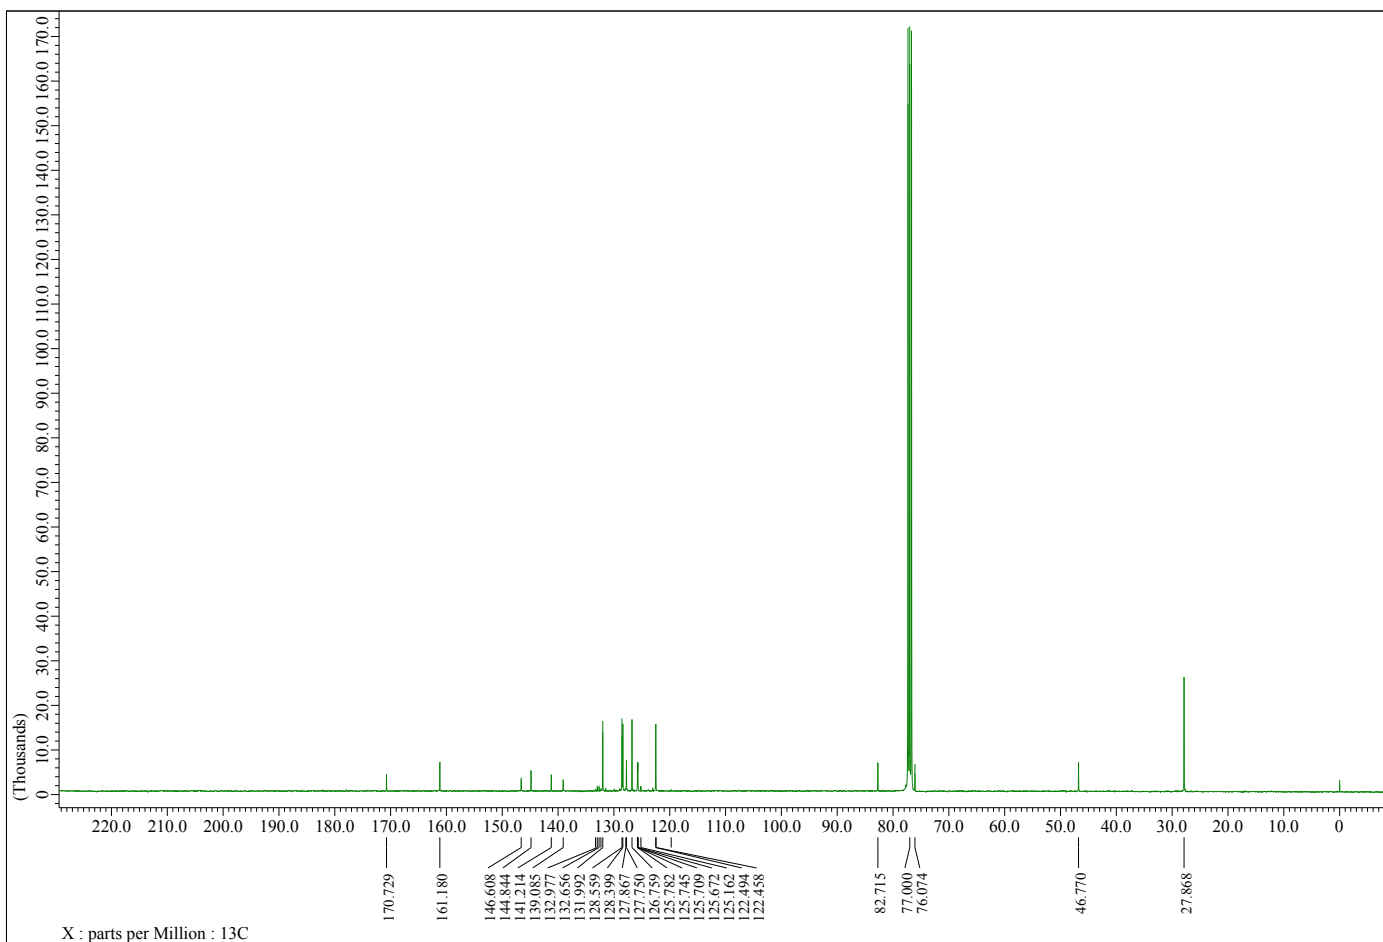

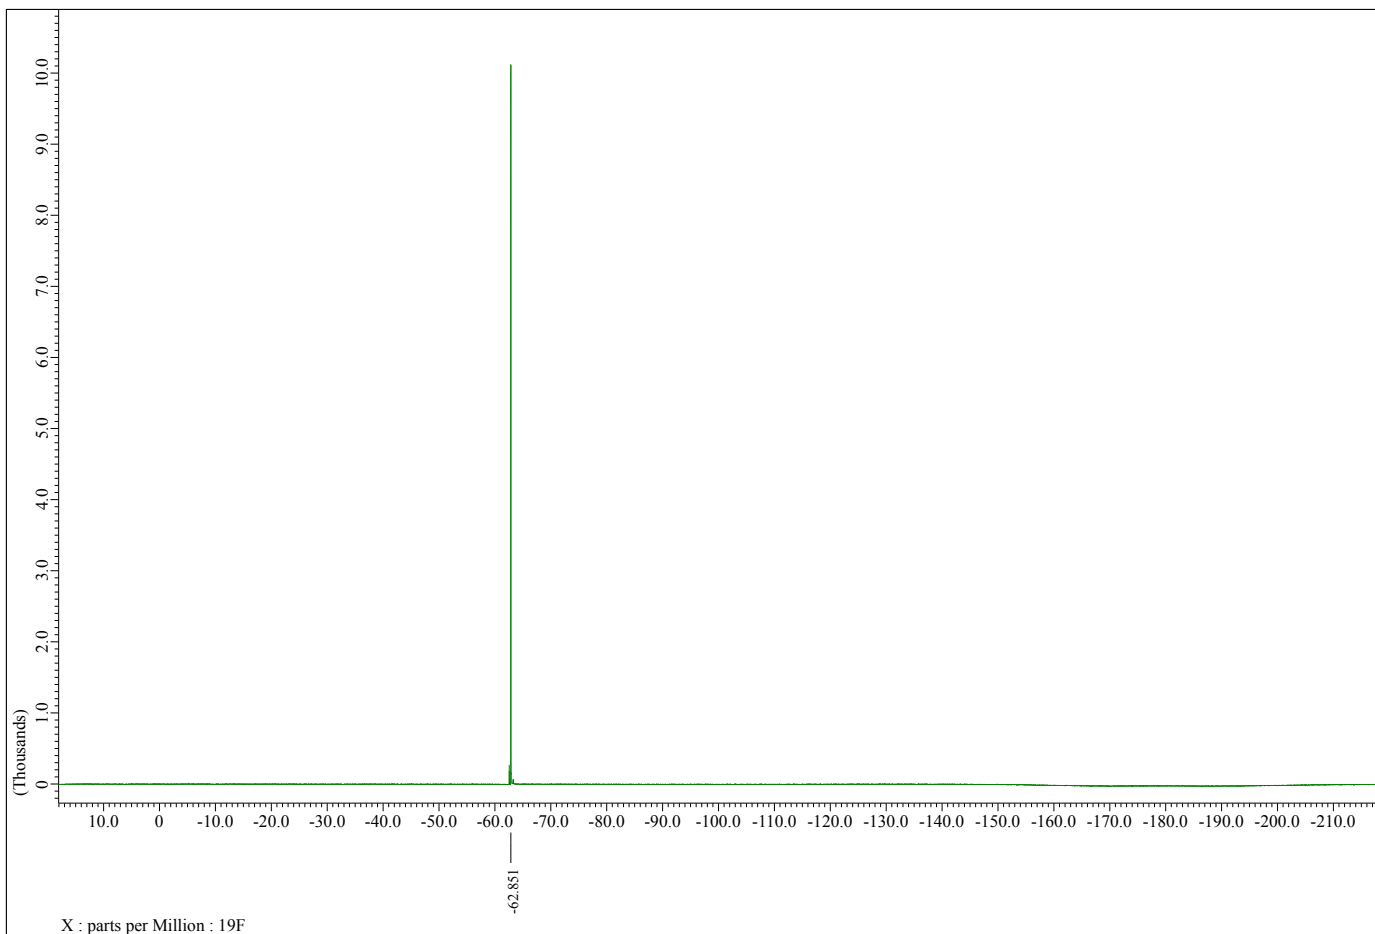

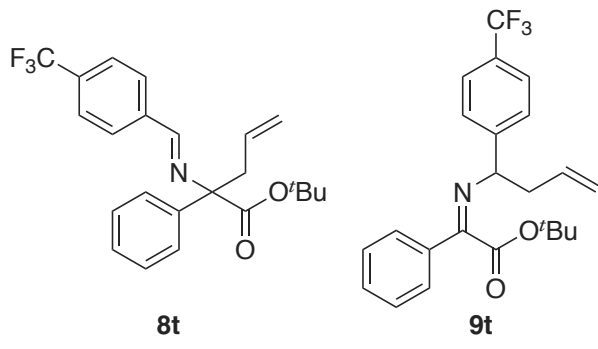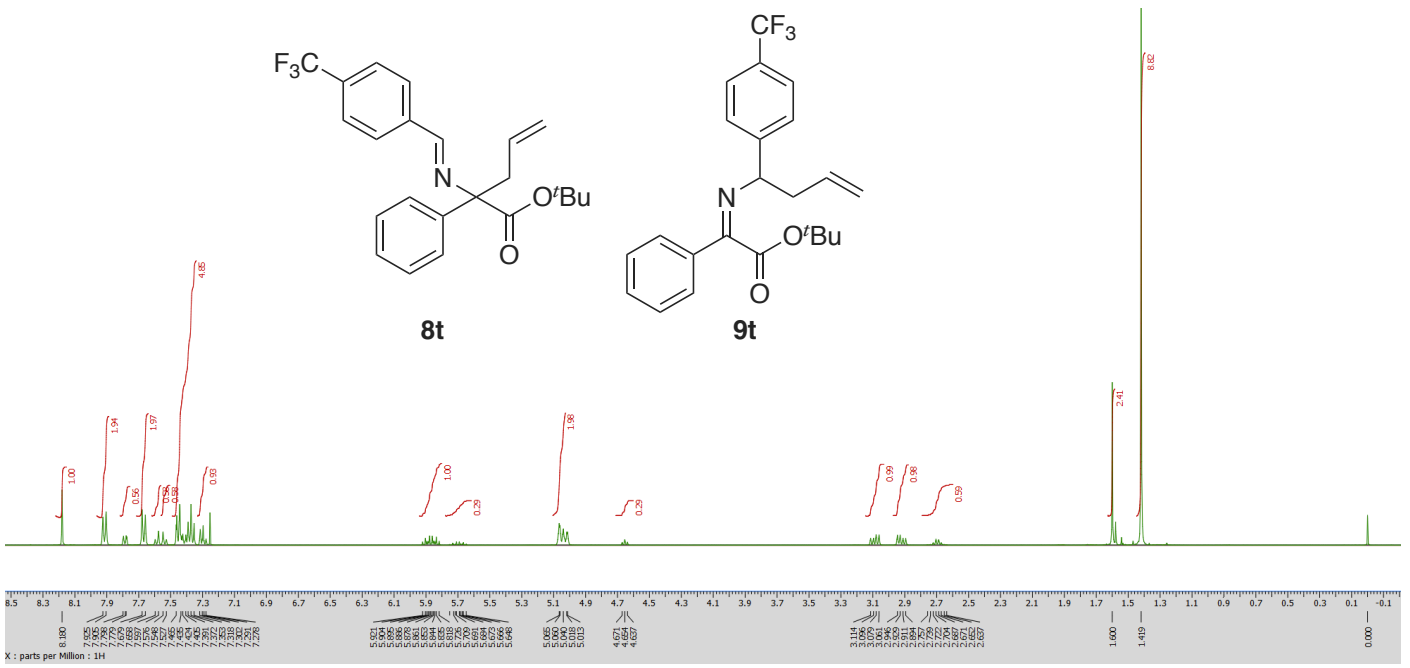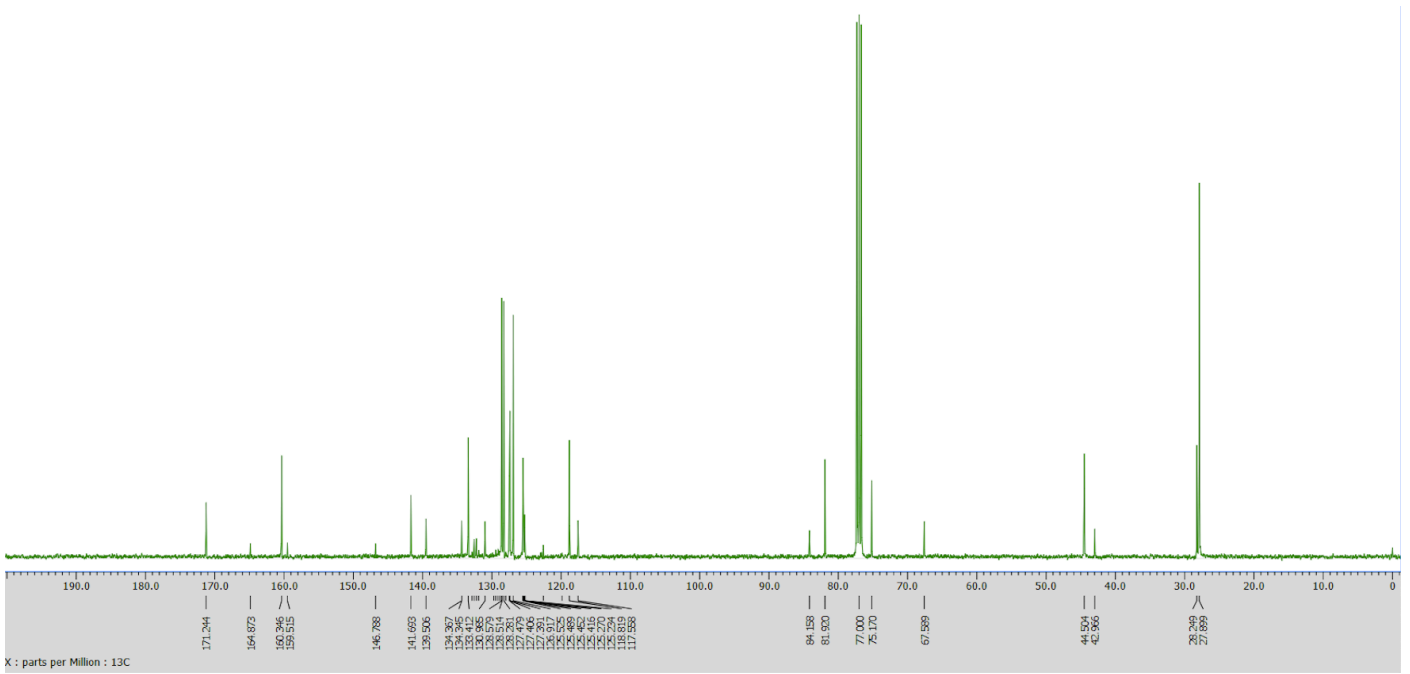

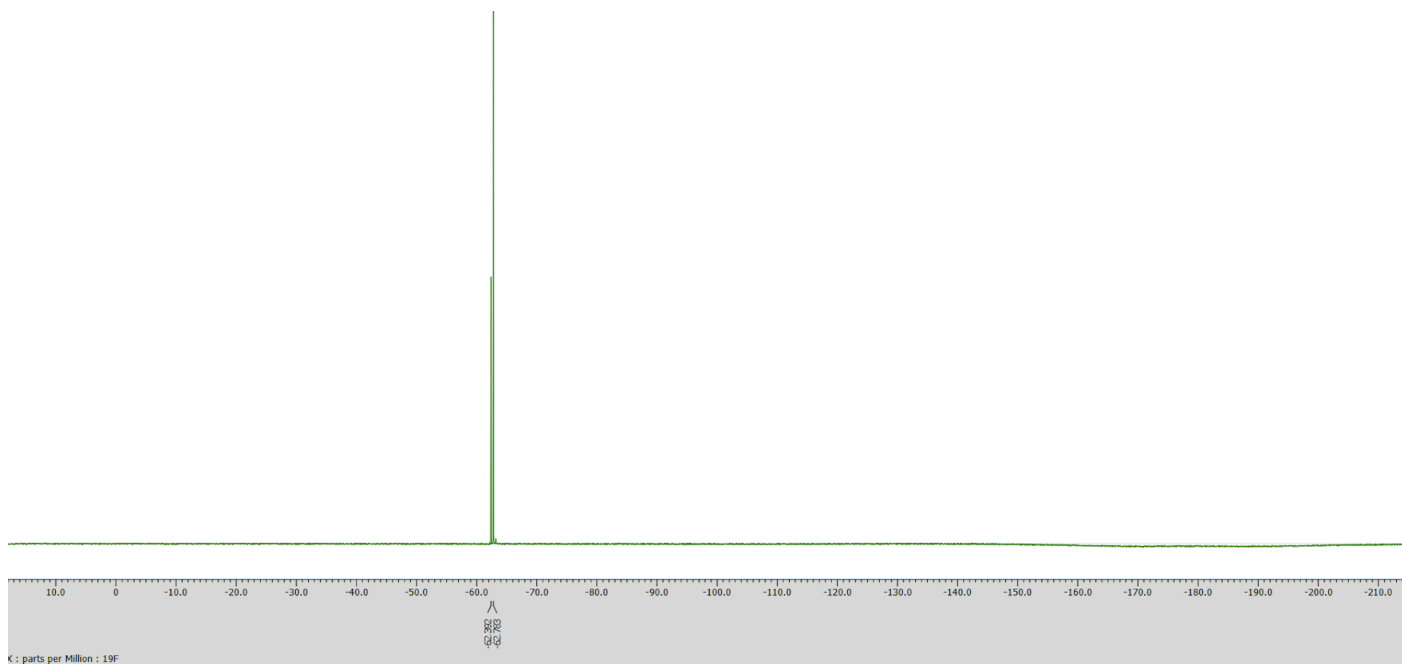



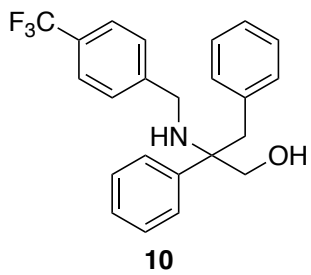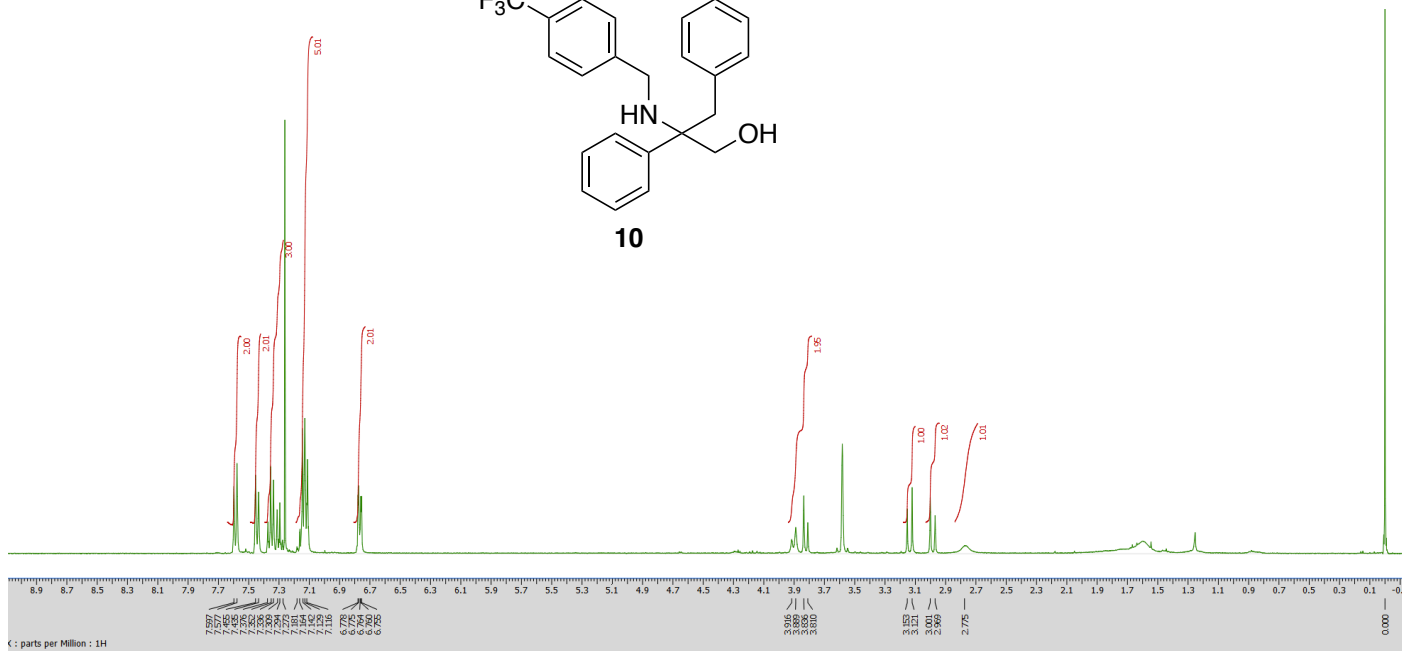

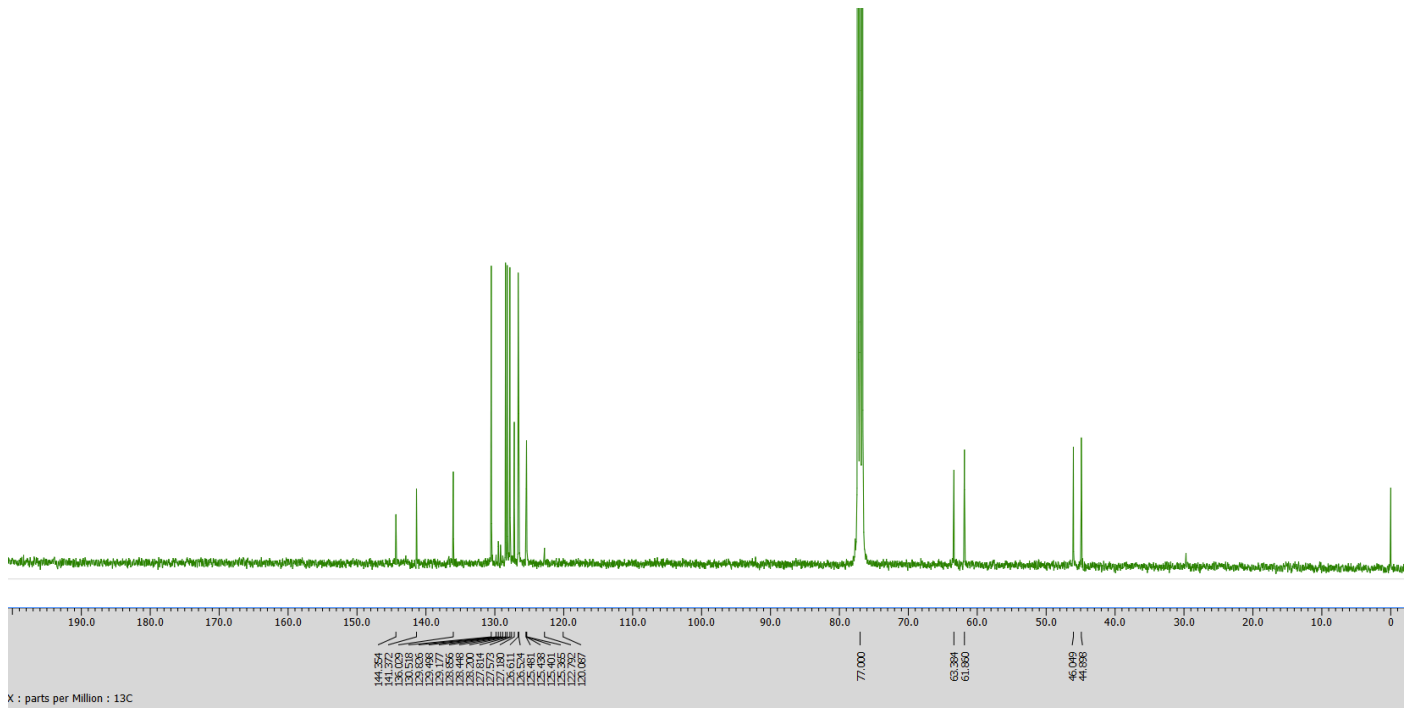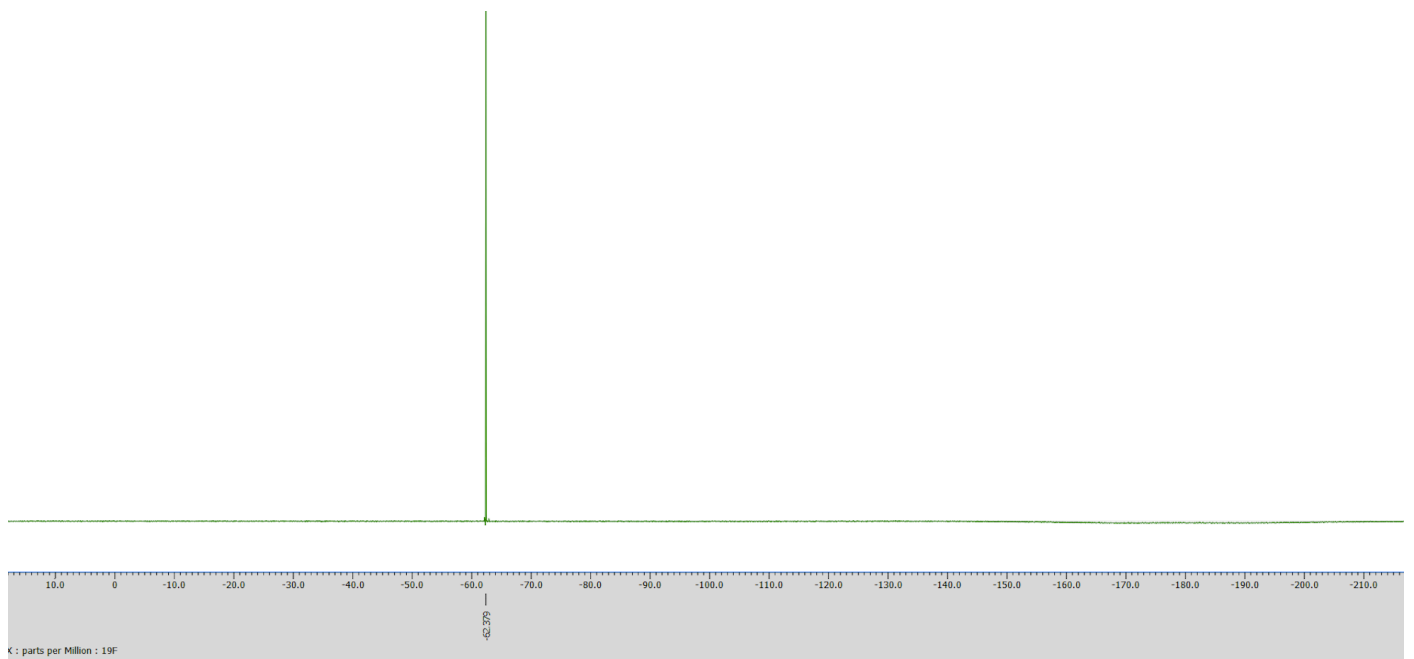

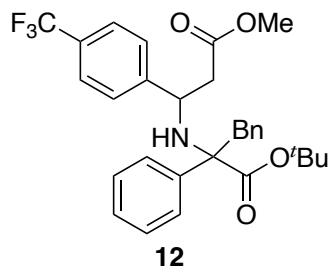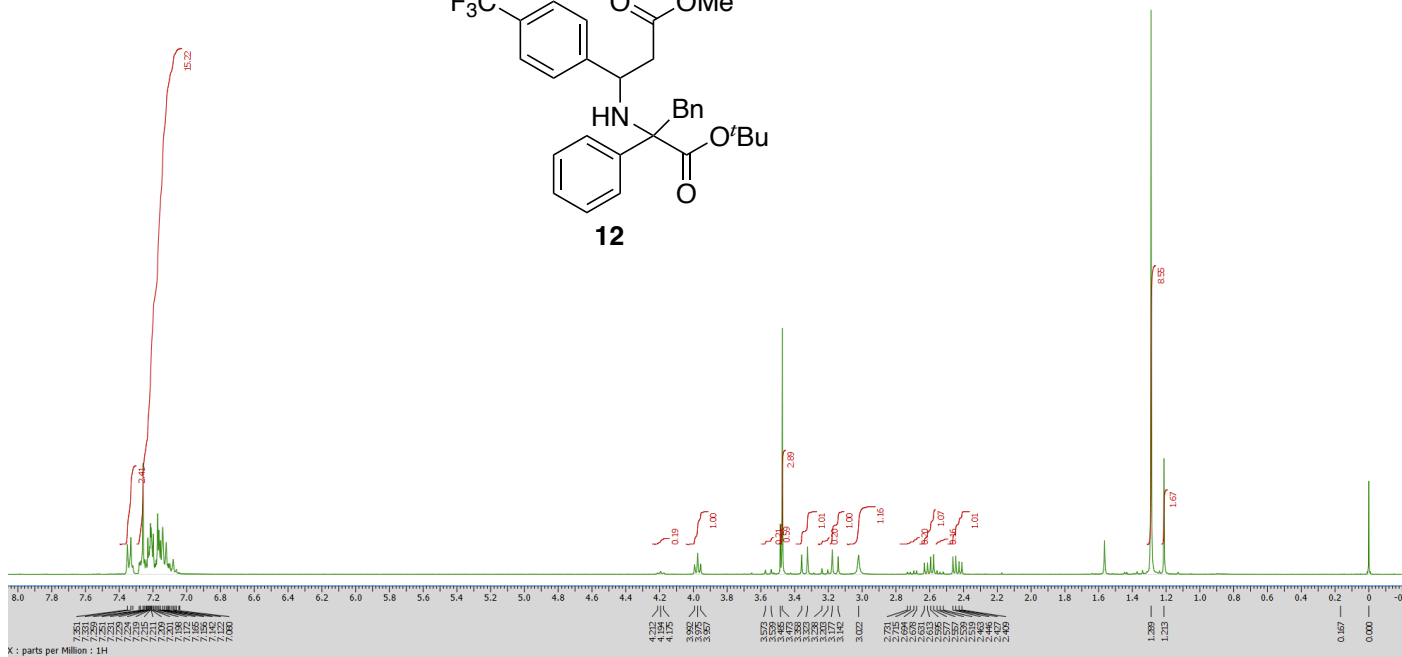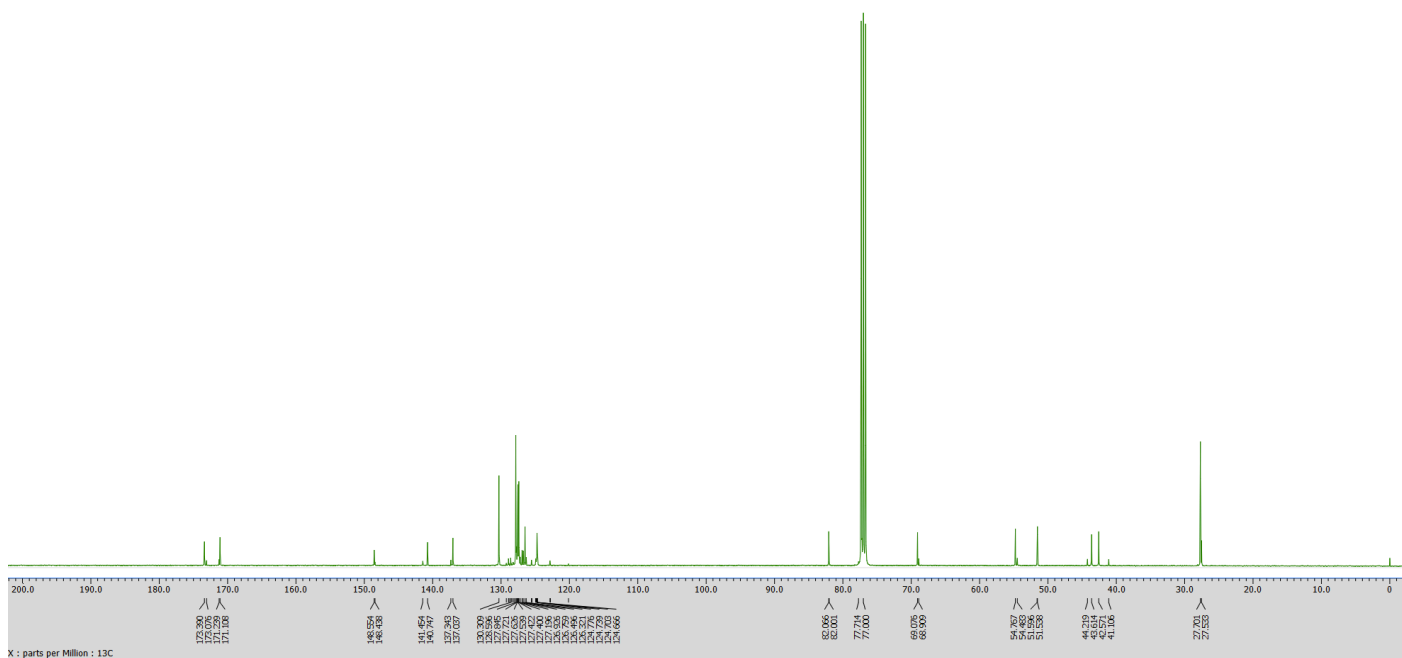

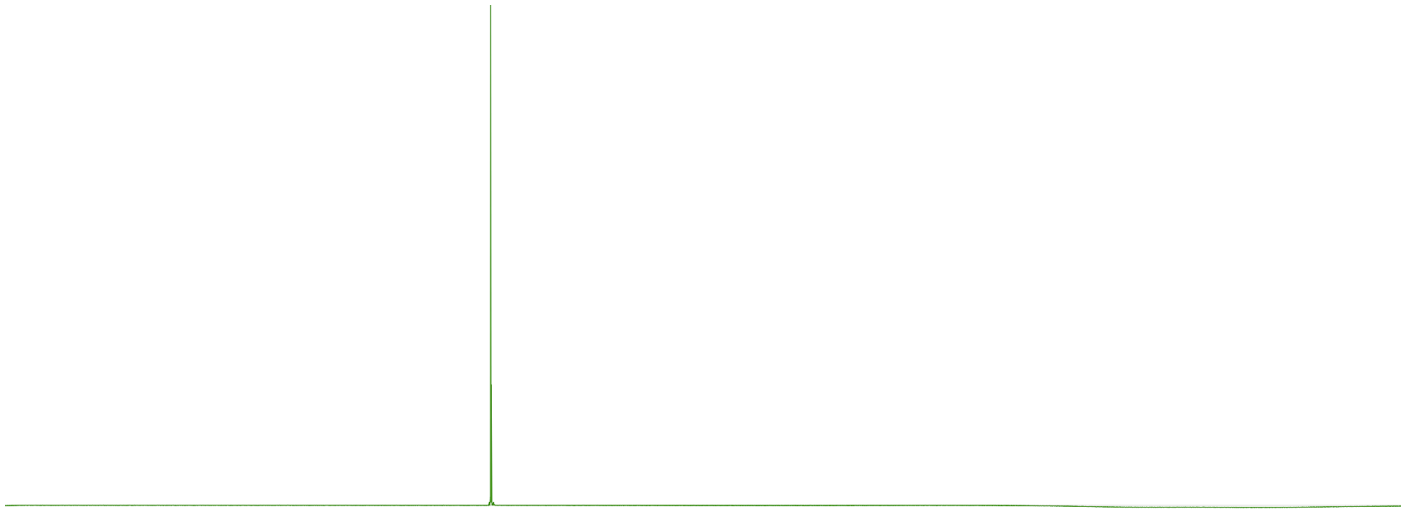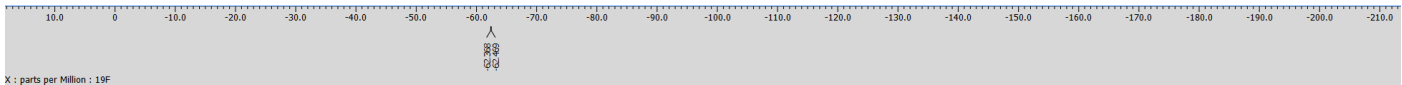

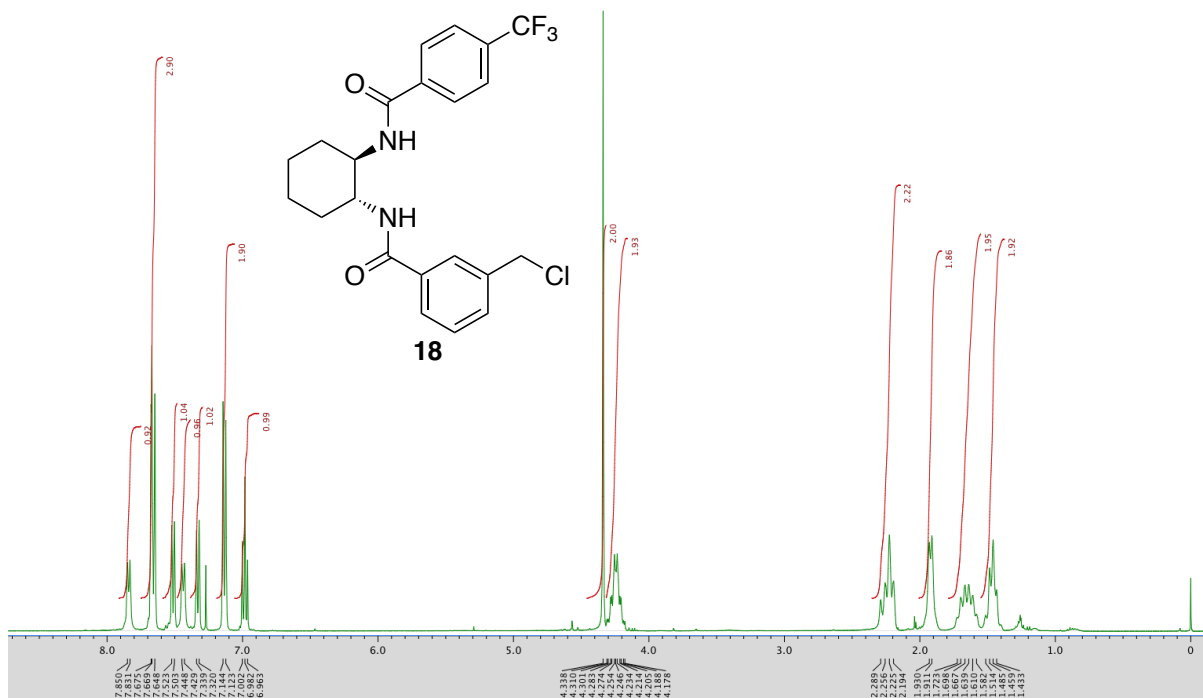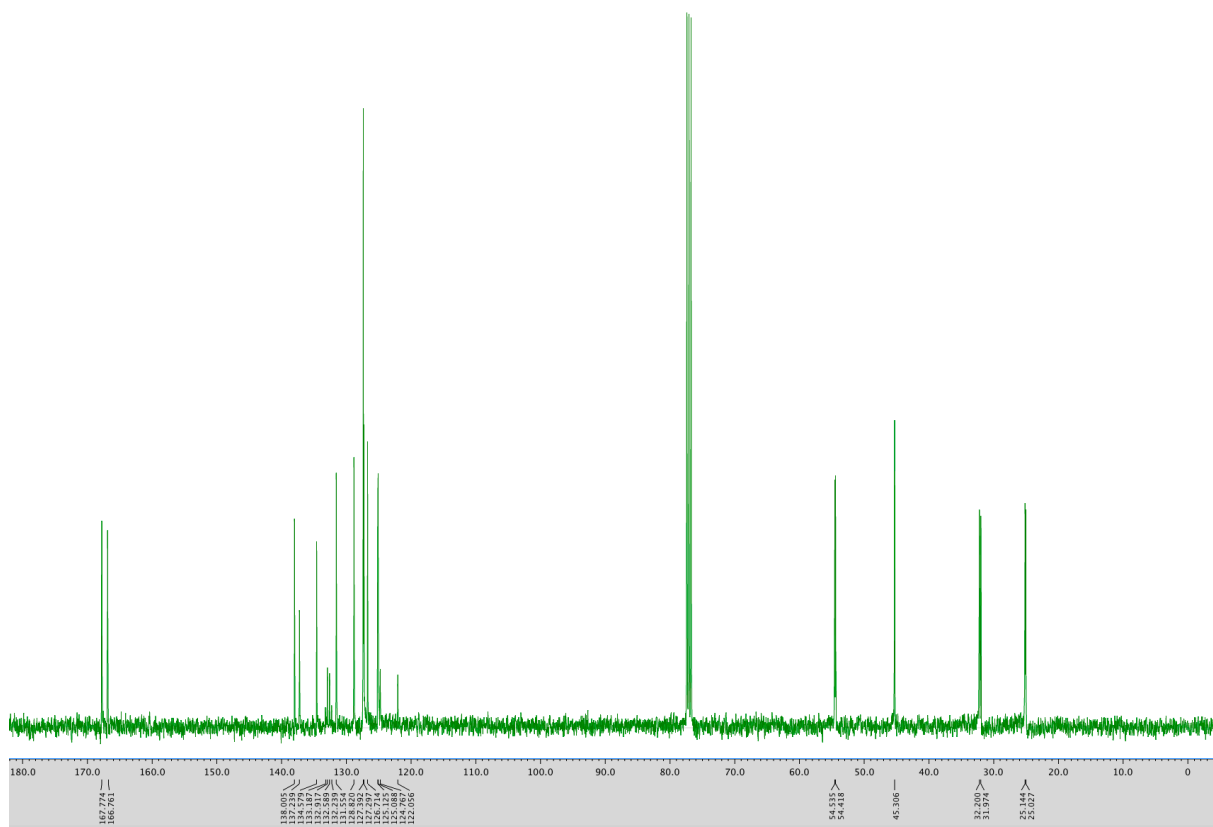

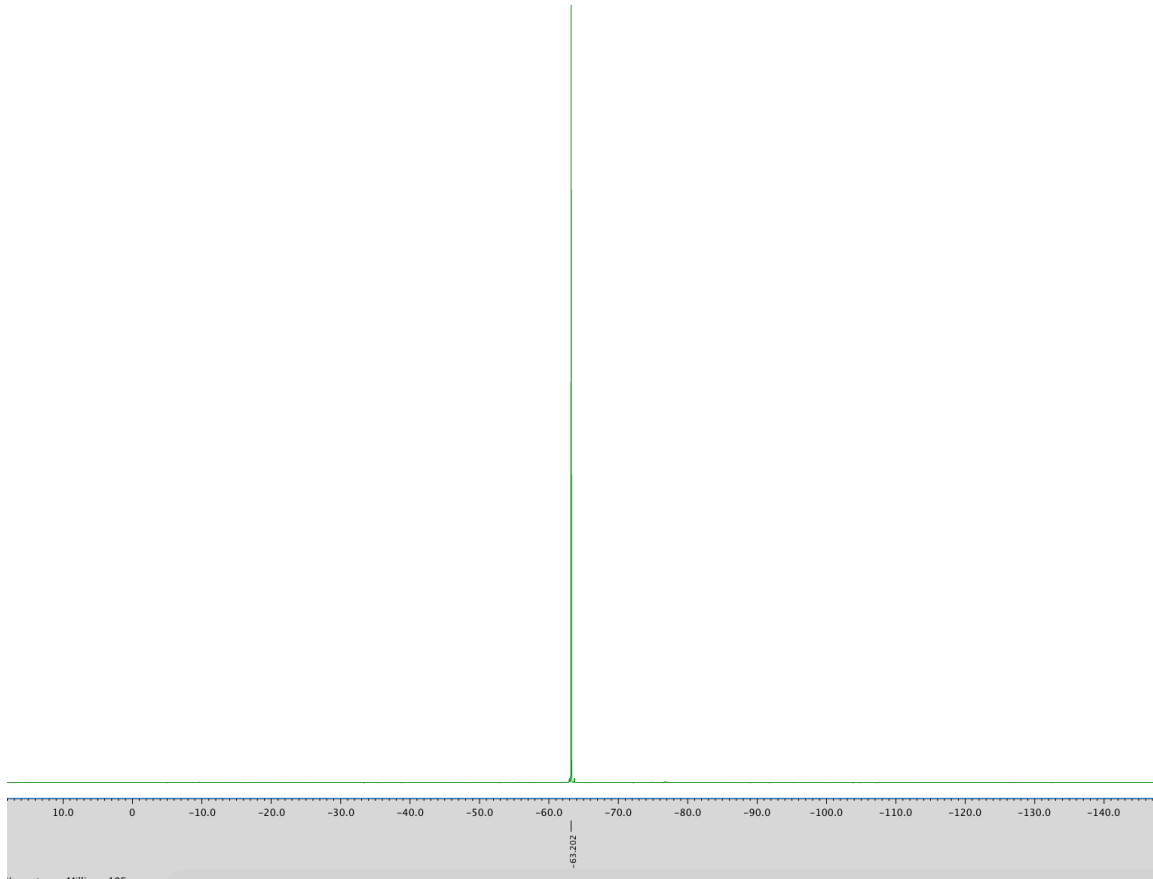

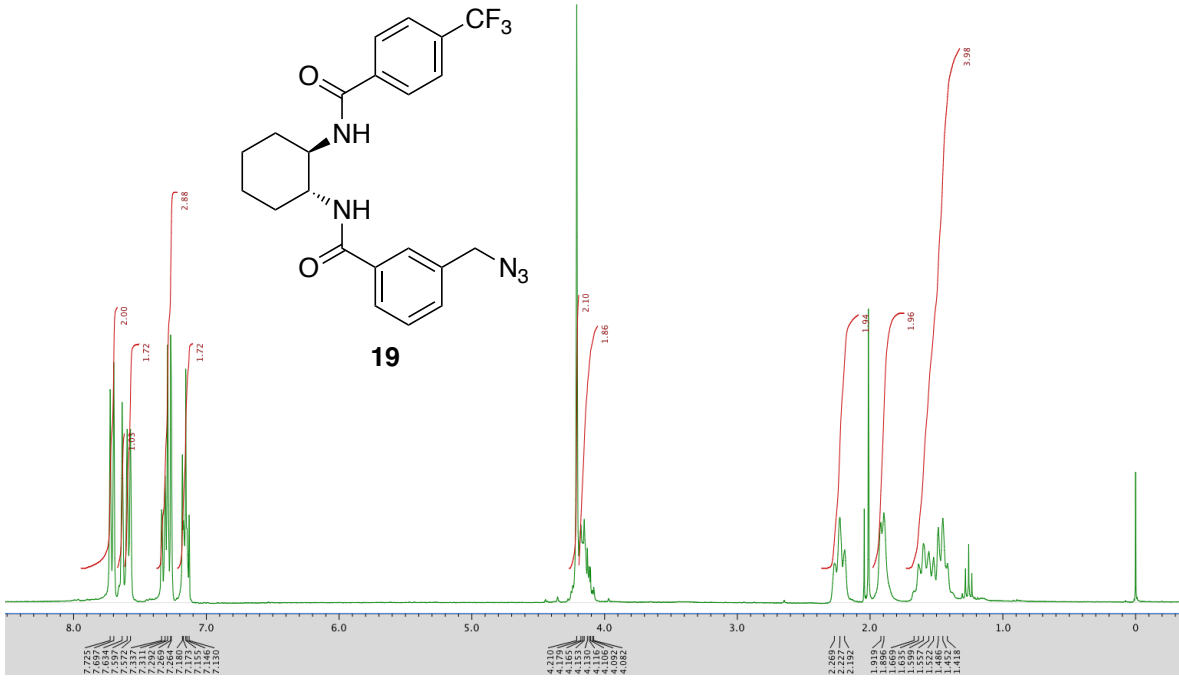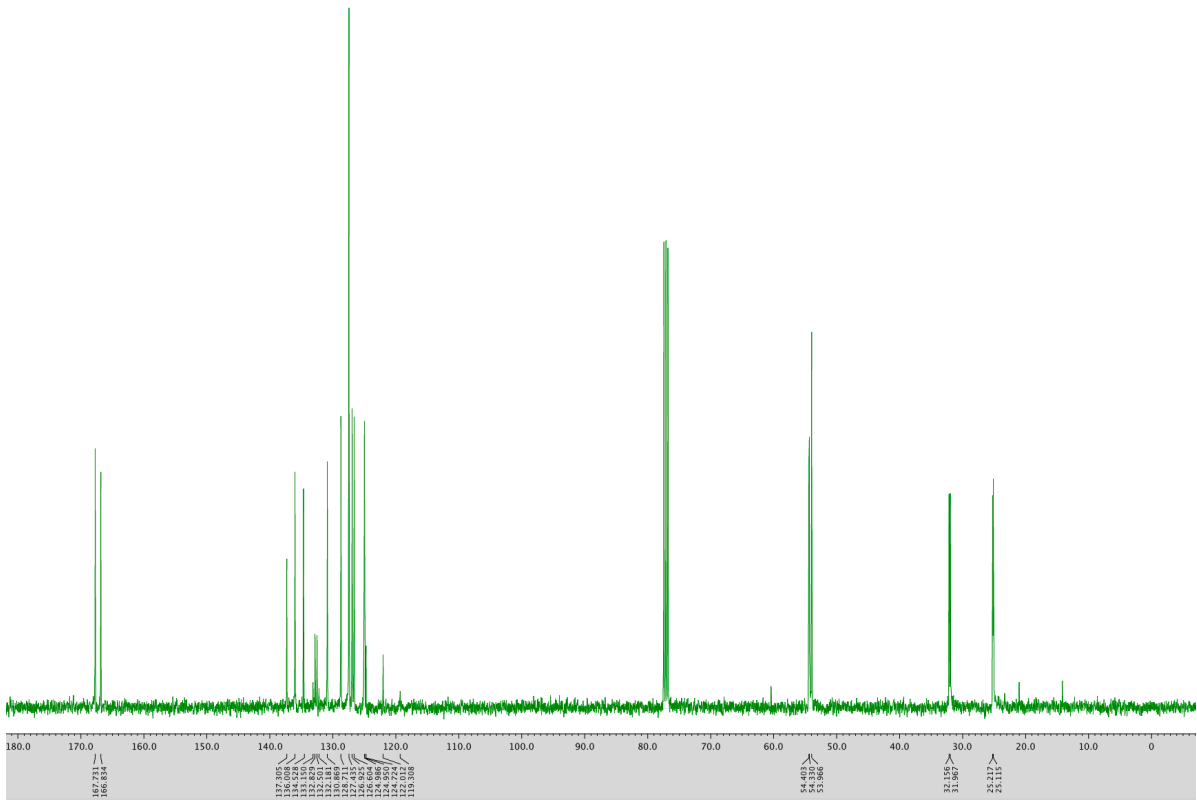

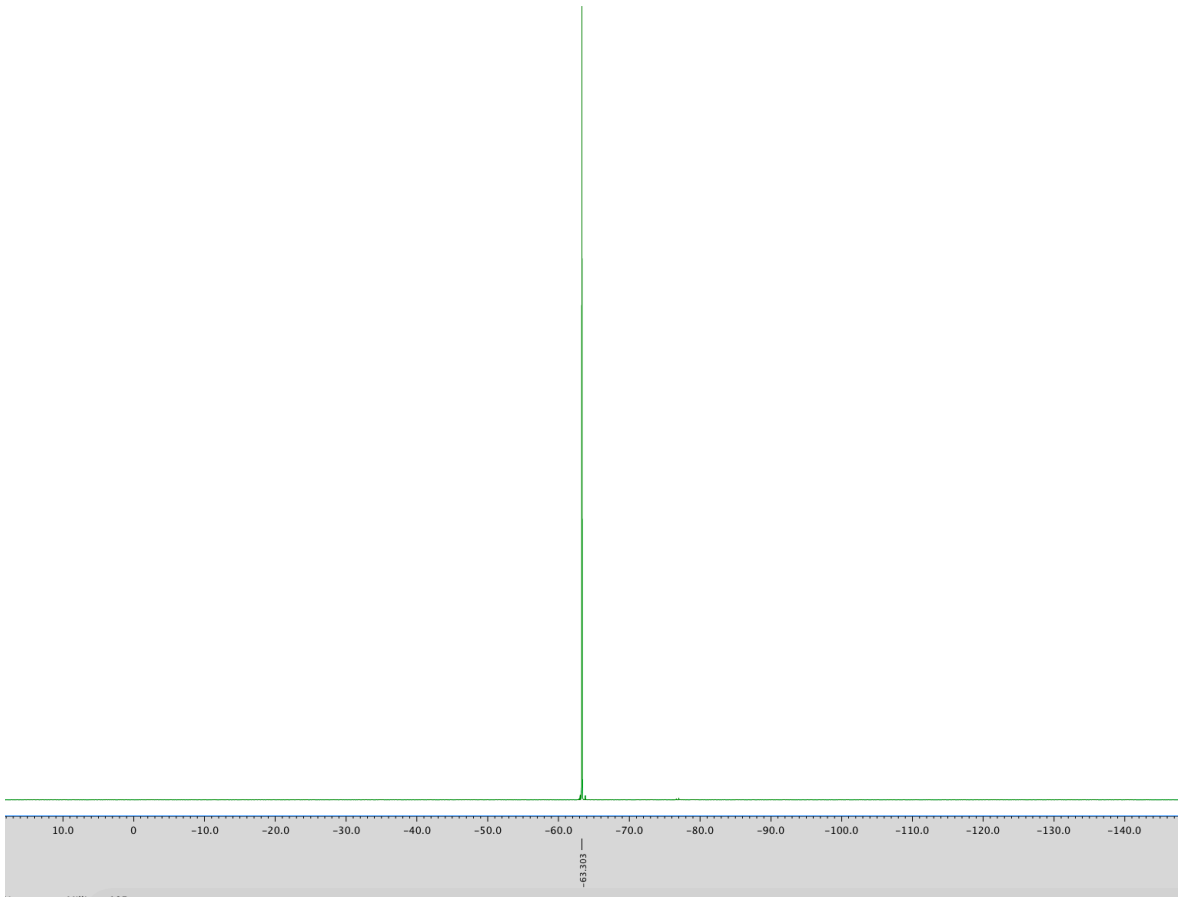



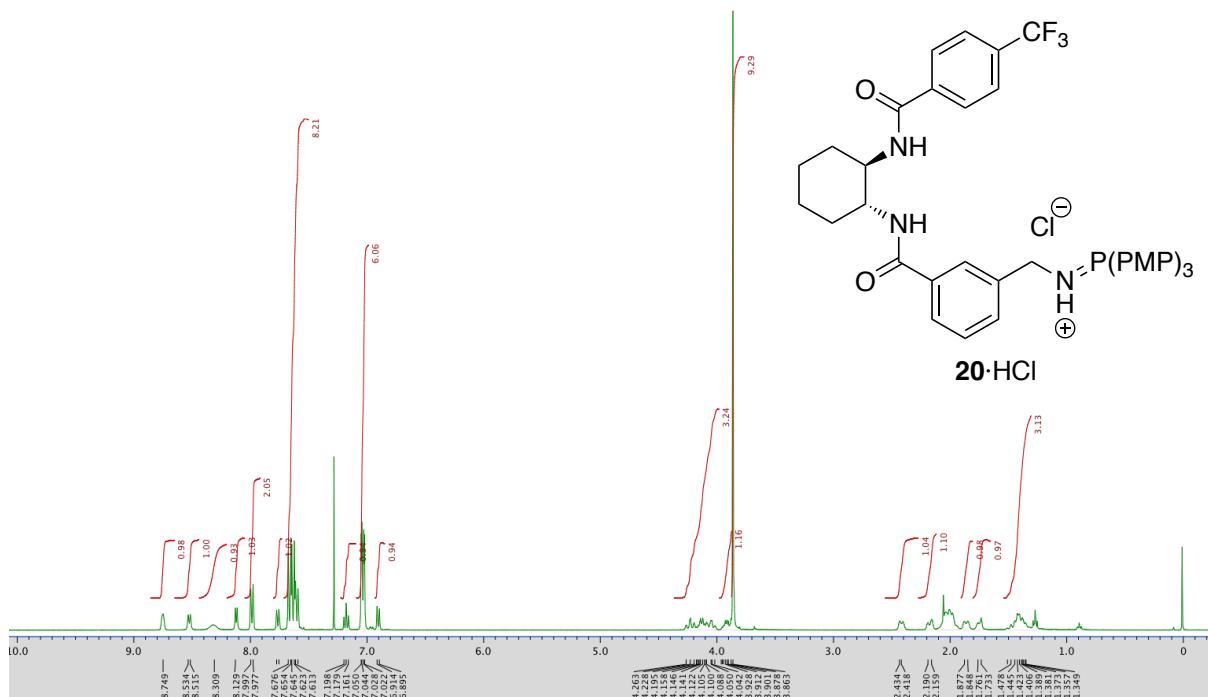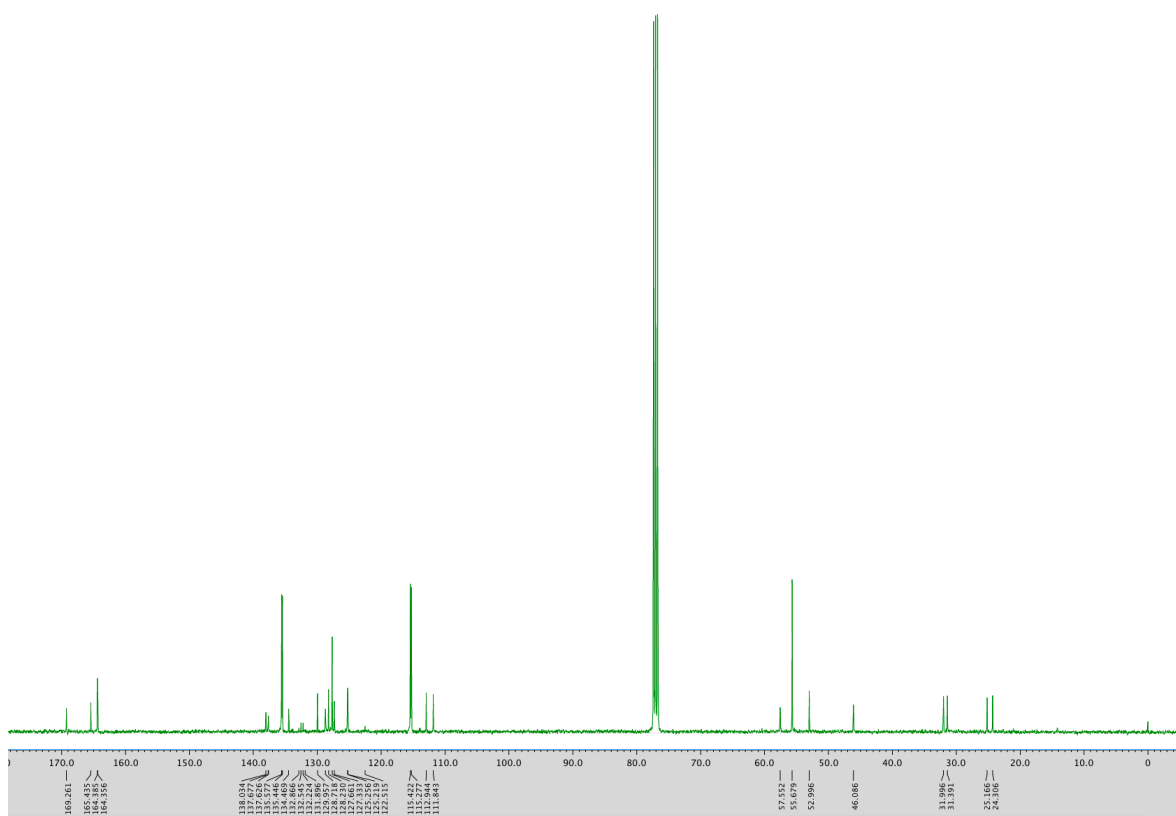

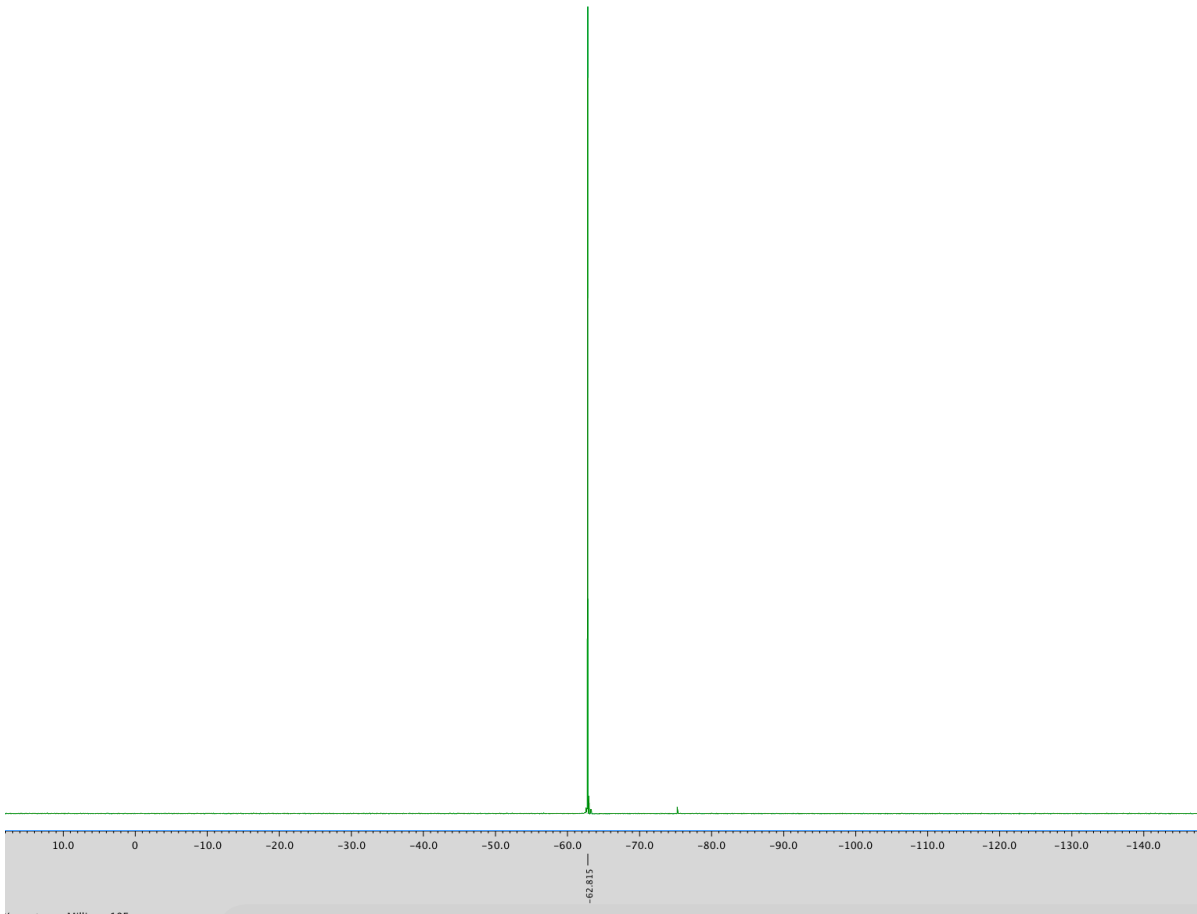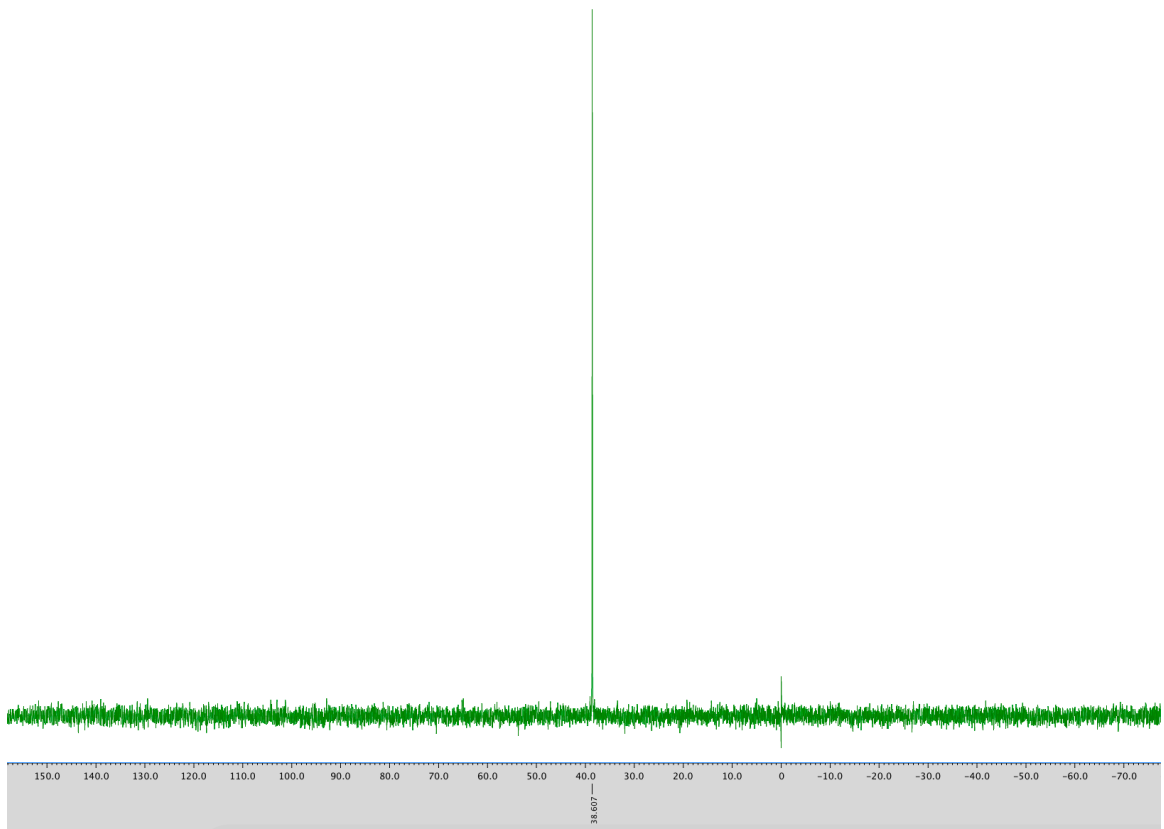

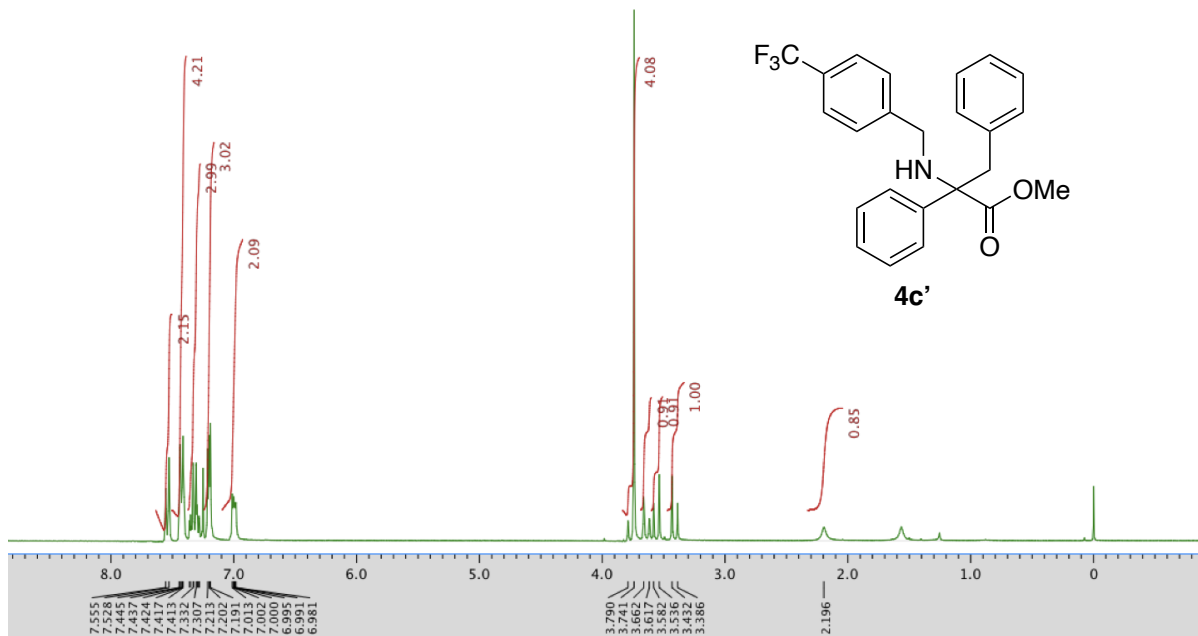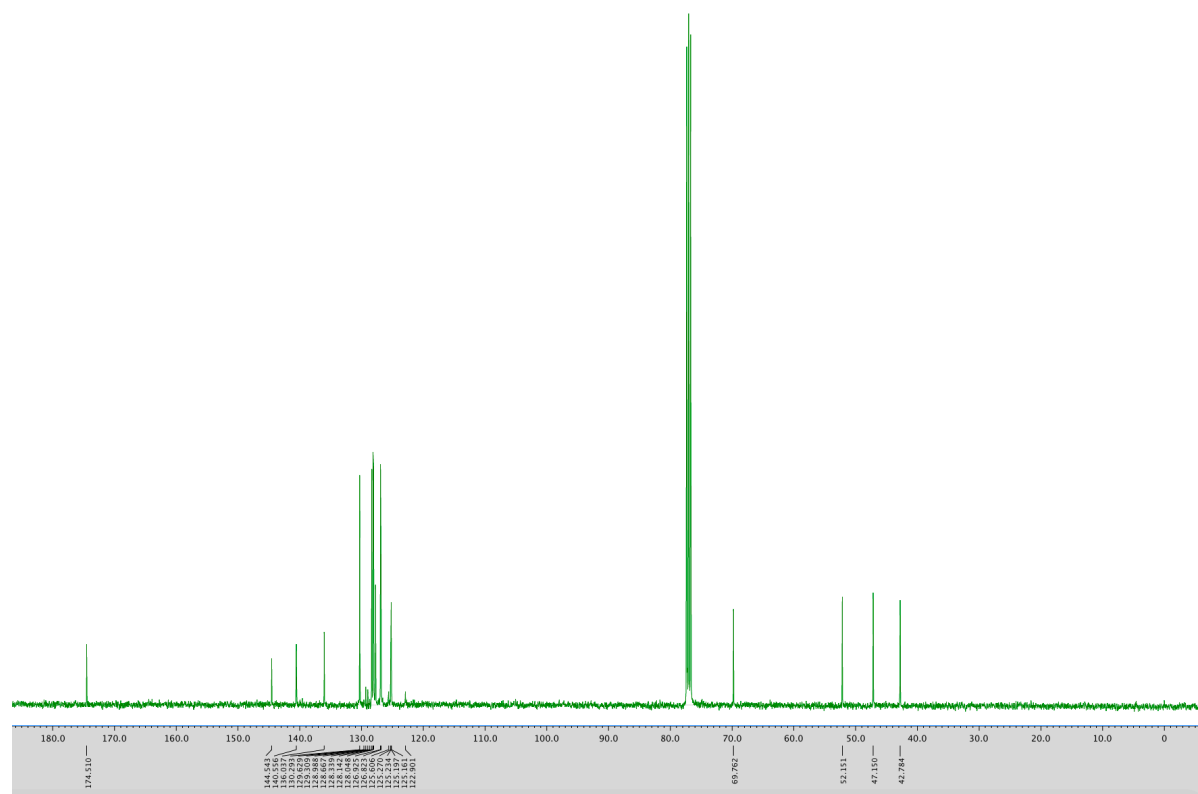

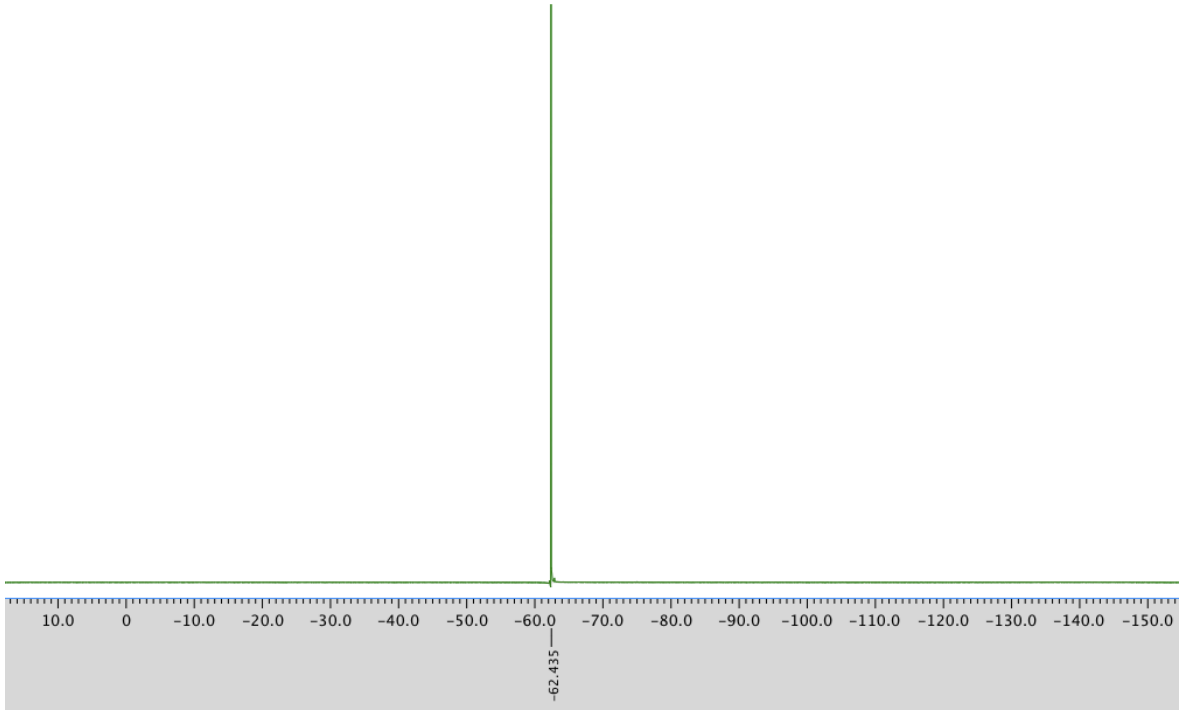

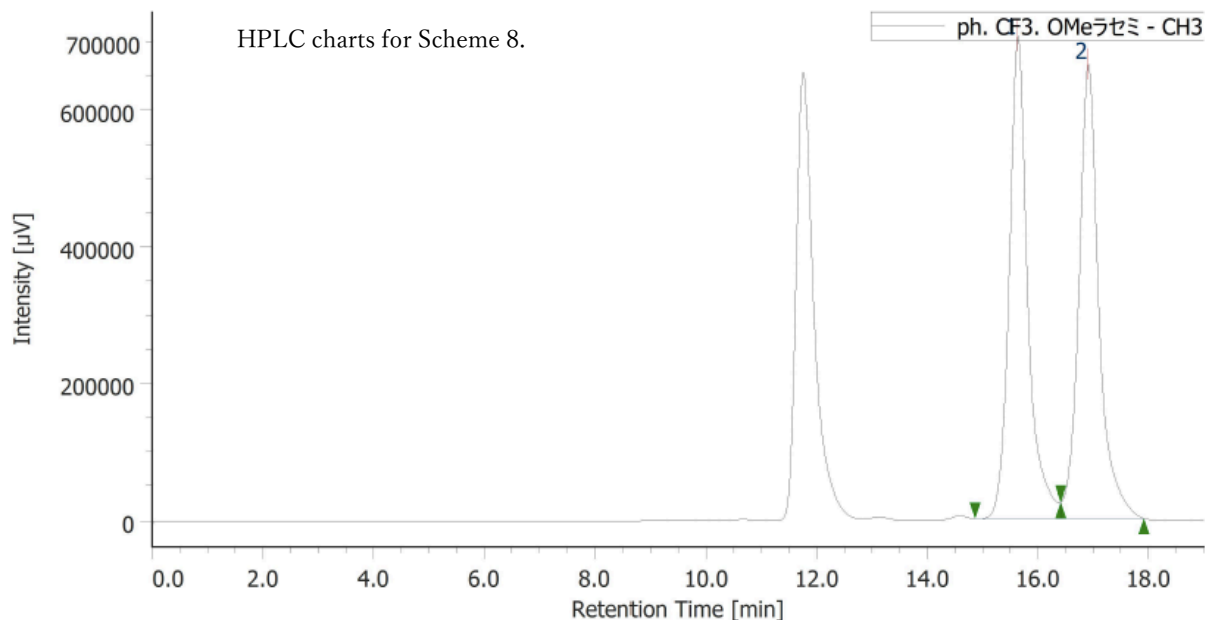

| # | ピーク名    | CH | tR [min] | area [μV·sec] | height [μV] | area%  | height% |
|---|---------|----|----------|---------------|-------------|--------|---------|
| 1 | Unknown | 3  | 15.633   | 16421893      | 704913      | 49.700 | 51.497  |
| 2 | Unknown | 3  | 16.908   | 16620101      | 663922      | 50.300 | 48.503  |

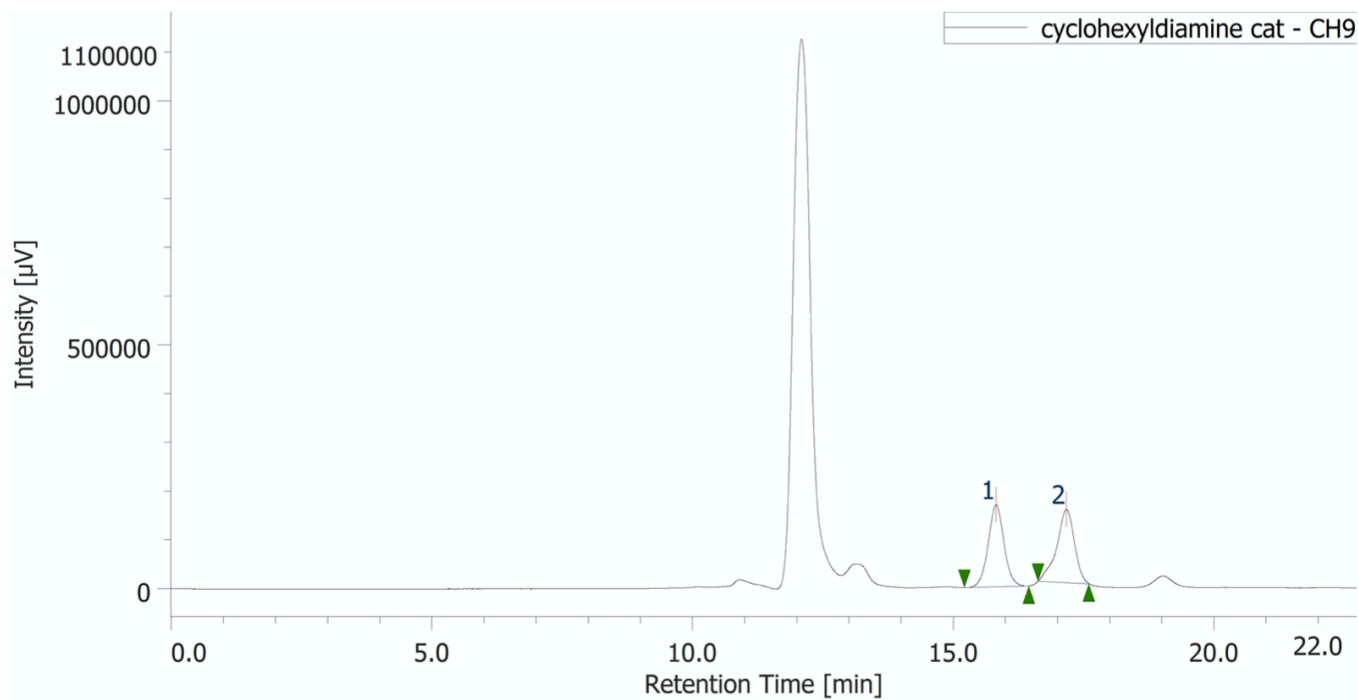

| # | ピーク名    | CH | tR [min] | 面積 [μV·sec] | 高さ [μV] | 面積%    | 高さ%    | 定量値 | NTP   | 分離度   | シンメトリー係数 | 警告 |
|---|---------|----|----------|-------------|---------|--------|--------|-----|-------|-------|----------|----|
| 1 | Unknown | 9  | 15.818   | 3539934     | 167938  | 50.012 | 52.820 | N/A | 13581 | 2.394 | 1.026    |    |
| 2 | Unknown | 9  | 17.167   | 3538247     | 150003  | 49.988 | 47.180 | N/A | 13708 | N/A   | 0.863    |    |

## 2. Calculation results

APT charges for 14

|    |   | 1         |
|----|---|-----------|
| 1  | C | 0.057578  |
| 2  | C | -0.204254 |
| 3  | C | 0.006295  |
| 4  | C | -0.234990 |
| 5  | C | 0.474475  |
| 6  | C | -0.202360 |
| 7  | C | -1.789996 |
| 8  | C | 2.548976  |
| 9  | O | -1.175909 |
| 10 | O | -1.896817 |
| 11 | C | 0.949861  |
| 12 | C | -0.016011 |
| 13 | C | -0.070054 |
| 14 | C | -0.059340 |
| 15 | N | 1.548022  |
| 16 | C | -1.702556 |
| 17 | C | 1.748612  |
| 18 | C | -0.674597 |
| 19 | C | 0.832251  |
| 20 | C | -2.168591 |
| 21 | C | 0.761228  |
| 22 | C | -0.913810 |
| 23 | N | 4.445701  |
| 24 | O | -2.085545 |
| 25 | O | -1.660953 |
| 26 | H | -0.004974 |
| 27 | H | 0.020504  |
| 28 | H | 0.027881  |
| 29 | H | 0.079067  |

|    |   |           |
|----|---|-----------|
| 30 | H | 0.074195  |
| 31 | H | -0.009525 |
| 32 | H | -0.015410 |
| 33 | H | -0.013511 |
| 34 | H | -0.018141 |
| 35 | H | 0.037196  |
| 36 | H | -0.013053 |
| 37 | H | -0.014754 |
| 38 | H | -0.027899 |
| 39 | H | 0.047621  |
| 40 | H | 0.011192  |
| 41 | H | 0.081102  |
| 42 | H | 0.085323  |
| 43 | H | 0.090914  |
| 44 | H | 0.045056  |

Sum of APT charges = -1.00000

APT charges with hydrogens summed into heavy atoms:

| 1  |   |           |
|----|---|-----------|
| 1  | C | 0.052603  |
| 2  | C | -0.183750 |
| 3  | C | 0.034176  |
| 4  | C | -0.155923 |
| 5  | C | 0.474475  |
| 6  | C | -0.128165 |
| 7  | C | -1.789996 |
| 8  | C | 2.548976  |
| 9  | O | -1.175909 |
| 10 | O | -1.896817 |
| 11 | C | 0.949861  |
| 12 | C | -0.054456 |
| 13 | C | -0.064052 |
| 14 | C | -0.054372 |

15 N 1.548022  
 16 C -1.691364  
 17 C 1.748612  
 18 C -0.593496  
 19 C 0.917574  
 20 C -2.168591  
 21 C 0.852142  
 22 C -0.868754  
 23 N 4.445701  
 24 O -2.085545  
 25 O -1.660953

Electronic spatial extent (au):  $\langle R^{**2} \rangle =$  12639.6273

Charge= -1.0000 electrons

Dipole moment (field-independent basis, Debye):

X= -13.5830 Y= 5.0781 Z= 0.5726 Tot=  
 14.5125

Quadrupole moment (field-independent basis, Debye-Ang):

XX= -298.7349 YY= -141.7707 ZZ= -155.3366  
 XY= -2.2532 XZ= -8.7809 YZ= 0.8714

Traceless Quadrupole moment (field-independent basis, Debye-Ang):

XX= -100.1208 YY= 56.8434 ZZ= 43.2775  
 XY= -2.2532 XZ= -8.7809 YZ= 0.8714

Octapole moment (field-independent basis, Debye-Ang\*\*2):

XXX= -868.3300 YYY= 55.8687 ZZZ= 0.7060 XYY=  
 -44.2275

XXY= 63.6739 XXZ= 25.6566 XZZ= 10.1374 YZZ=  
 17.1797

YYZ= -7.1366 XYZ= 6.4813

Hexadecapole moment (field-independent basis, Debye-Ang\*\*3):

XXXX= -18644.1341 YYYY= -4890.0285 ZZZZ= -434.4642 XXXY=  
 202.0320

XXXZ= -226.6219 YYYYX= -110.7852 YYYYZ= 31.6756 ZZZX=  
 4.1115



ZZZY= 5.5002 XXYY= -2866.3736 XXZZ= -2041.6761 YYZZ= -  
996.3062  
XXYZ= -25.0263 YYXZ= -24.8568 ZZXY= -56.1882  
N-N= 2.030127132297D+03 E-N=-6.747352665266D+03 KE= 1.135174893490D+03

APT charges for 15

1

|    |   |           |
|----|---|-----------|
| 1  | C | 0.132016  |
| 2  | C | -0.297806 |
| 3  | C | 0.112695  |
| 4  | C | -0.256308 |
| 5  | C | 0.749801  |
| 6  | C | -0.369664 |
| 7  | C | -1.802282 |
| 8  | C | 2.324376  |
| 9  | O | -1.237073 |
| 10 | O | -1.706005 |
| 11 | C | 0.918701  |
| 12 | C | 0.002765  |
| 13 | C | -0.053537 |
| 14 | C | -0.052689 |
| 15 | N | 1.209611  |
| 16 | C | -1.162417 |
| 17 | C | 1.255011  |
| 18 | C | -0.448009 |
| 19 | C | 0.369335  |
| 20 | C | -0.972621 |
| 21 | C | 0.390596  |
| 22 | C | -0.671160 |
| 23 | C | 2.949834  |
| 24 | F | -0.847072 |
| 25 | F | -1.002019 |
| 26 | F | -0.860207 |
| 27 | H | -0.000581 |
| 28 | H | 0.018222  |
| 29 | H | 0.016665  |
| 30 | H | 0.074784  |

|    |   |           |
|----|---|-----------|
| 31 | H | 0.094243  |
| 32 | H | -0.021044 |
| 33 | H | -0.020534 |
| 34 | H | -0.018871 |
| 35 | H | -0.027412 |
| 36 | H | 0.038027  |
| 37 | H | -0.021607 |
| 38 | H | -0.021826 |
| 39 | H | -0.030169 |
| 40 | H | 0.037062  |
| 41 | H | -0.010711 |
| 42 | H | 0.075974  |
| 43 | H | 0.050864  |
| 44 | H | 0.050215  |
| 45 | H | 0.040826  |

Sum of APT charges = -1.00000

APT charges with hydrogens summed into heavy atoms:

| 1  |   |           |
|----|---|-----------|
| 1  | C | 0.131435  |
| 2  | C | -0.279584 |
| 3  | C | 0.129360  |
| 4  | C | -0.181523 |
| 5  | C | 0.749801  |
| 6  | C | -0.275421 |
| 7  | C | -1.802282 |
| 8  | C | 2.324376  |
| 9  | O | -1.237073 |
| 10 | O | -1.706005 |
| 11 | C | 0.918701  |
| 12 | C | -0.057684 |
| 13 | C | -0.064529 |
| 14 | C | -0.067622 |

15 N 1.209611  
 16 C -1.173128  
 17 C 1.255011  
 18 C -0.372034  
 19 C 0.420199  
 20 C -0.972621  
 21 C 0.440811  
 22 C -0.630334  
 23 C 2.949834  
 24 F -0.847072  
 25 F -1.002019  
 26 F -0.860207

Electronic spatial extent (au):  $\langle R^2 \rangle = 14287.9823$

Charge = -1.0000 electrons

Dipole moment (field-independent basis, Debye):

X = 2.4449 Y = 5.2320 Z = 0.0468 Tot = 5.7753

Quadrupole moment (field-independent basis, Debye-Ang):

XX = -237.1129 YY = -152.4060 ZZ = -162.9796  
 XY = -11.0577 XZ = -5.1864 YZ = 0.2003

Traceless Quadrupole moment (field-independent basis, Debye-Ang):

XX = -52.9467 YY = 31.7602 ZZ = 21.1866  
 XY = -11.0577 XZ = -5.1864 YZ = 0.2003

Octapole moment (field-independent basis, Debye-Ang<sup>2</sup>):

XXX = -43.4763 YYY = 70.7153 ZZZ = -0.2681 XYY = 43.9035

XXY = 52.2995 XXZ = 15.5042 XZZ = 30.5530 YZZ = 18.9064

YYZ = -4.3204 XYZ = 4.7761

Hexadecapole moment (field-independent basis, Debye-Ang<sup>3</sup>):

XXXX = -15347.7890 YYYY = -5187.0152 ZZZZ = -496.3790 XXXY = 71.3648 -

|                        |                    |        |                    |         |                    |         |   |
|------------------------|--------------------|--------|--------------------|---------|--------------------|---------|---|
| XXXZ=                  | -158.3663          | YYYYX= | -240.2914          | YYYYZ=  | 26.3293            | ZZZX=   |   |
| -1.9766                |                    |        |                    |         |                    |         |   |
| ZZZY=                  | 1.6191             | XXYY=  | -2961.9583         | XXZZ=   | -2326.4079         | YYZZ=   | - |
| 1037.7977              |                    |        |                    |         |                    |         |   |
| XXYZ=                  | -46.1228           | YYXZ=  | -6.8933            | ZZXY=   | -66.7223           |         |   |
| N-N=                   | 2.205285503500D+03 | E-N=-  | 7.419783988978D+03 | KE=     | 1.266903673763D+03 |         |   |
| Exact polarizability:  | 737.070            | 84.562 | 455.238            | -14.079 | 1.397              | 233.400 |   |
| Approx polarizability: | 794.079            | 81.974 | 488.514            | -20.042 | 2.232              | 258.874 |   |
